# Supplementary material for: Identification of STAM-binding protein as a target for the treatment of gemcitabine resistance pancreatic cancer in a nutrient-poor microenvironment
Source: Springer Nature journal article supplement (doi:10.1038/s41419-024-07048-z), 2024-09-06

Full and uncropped western blot for Figure 1H

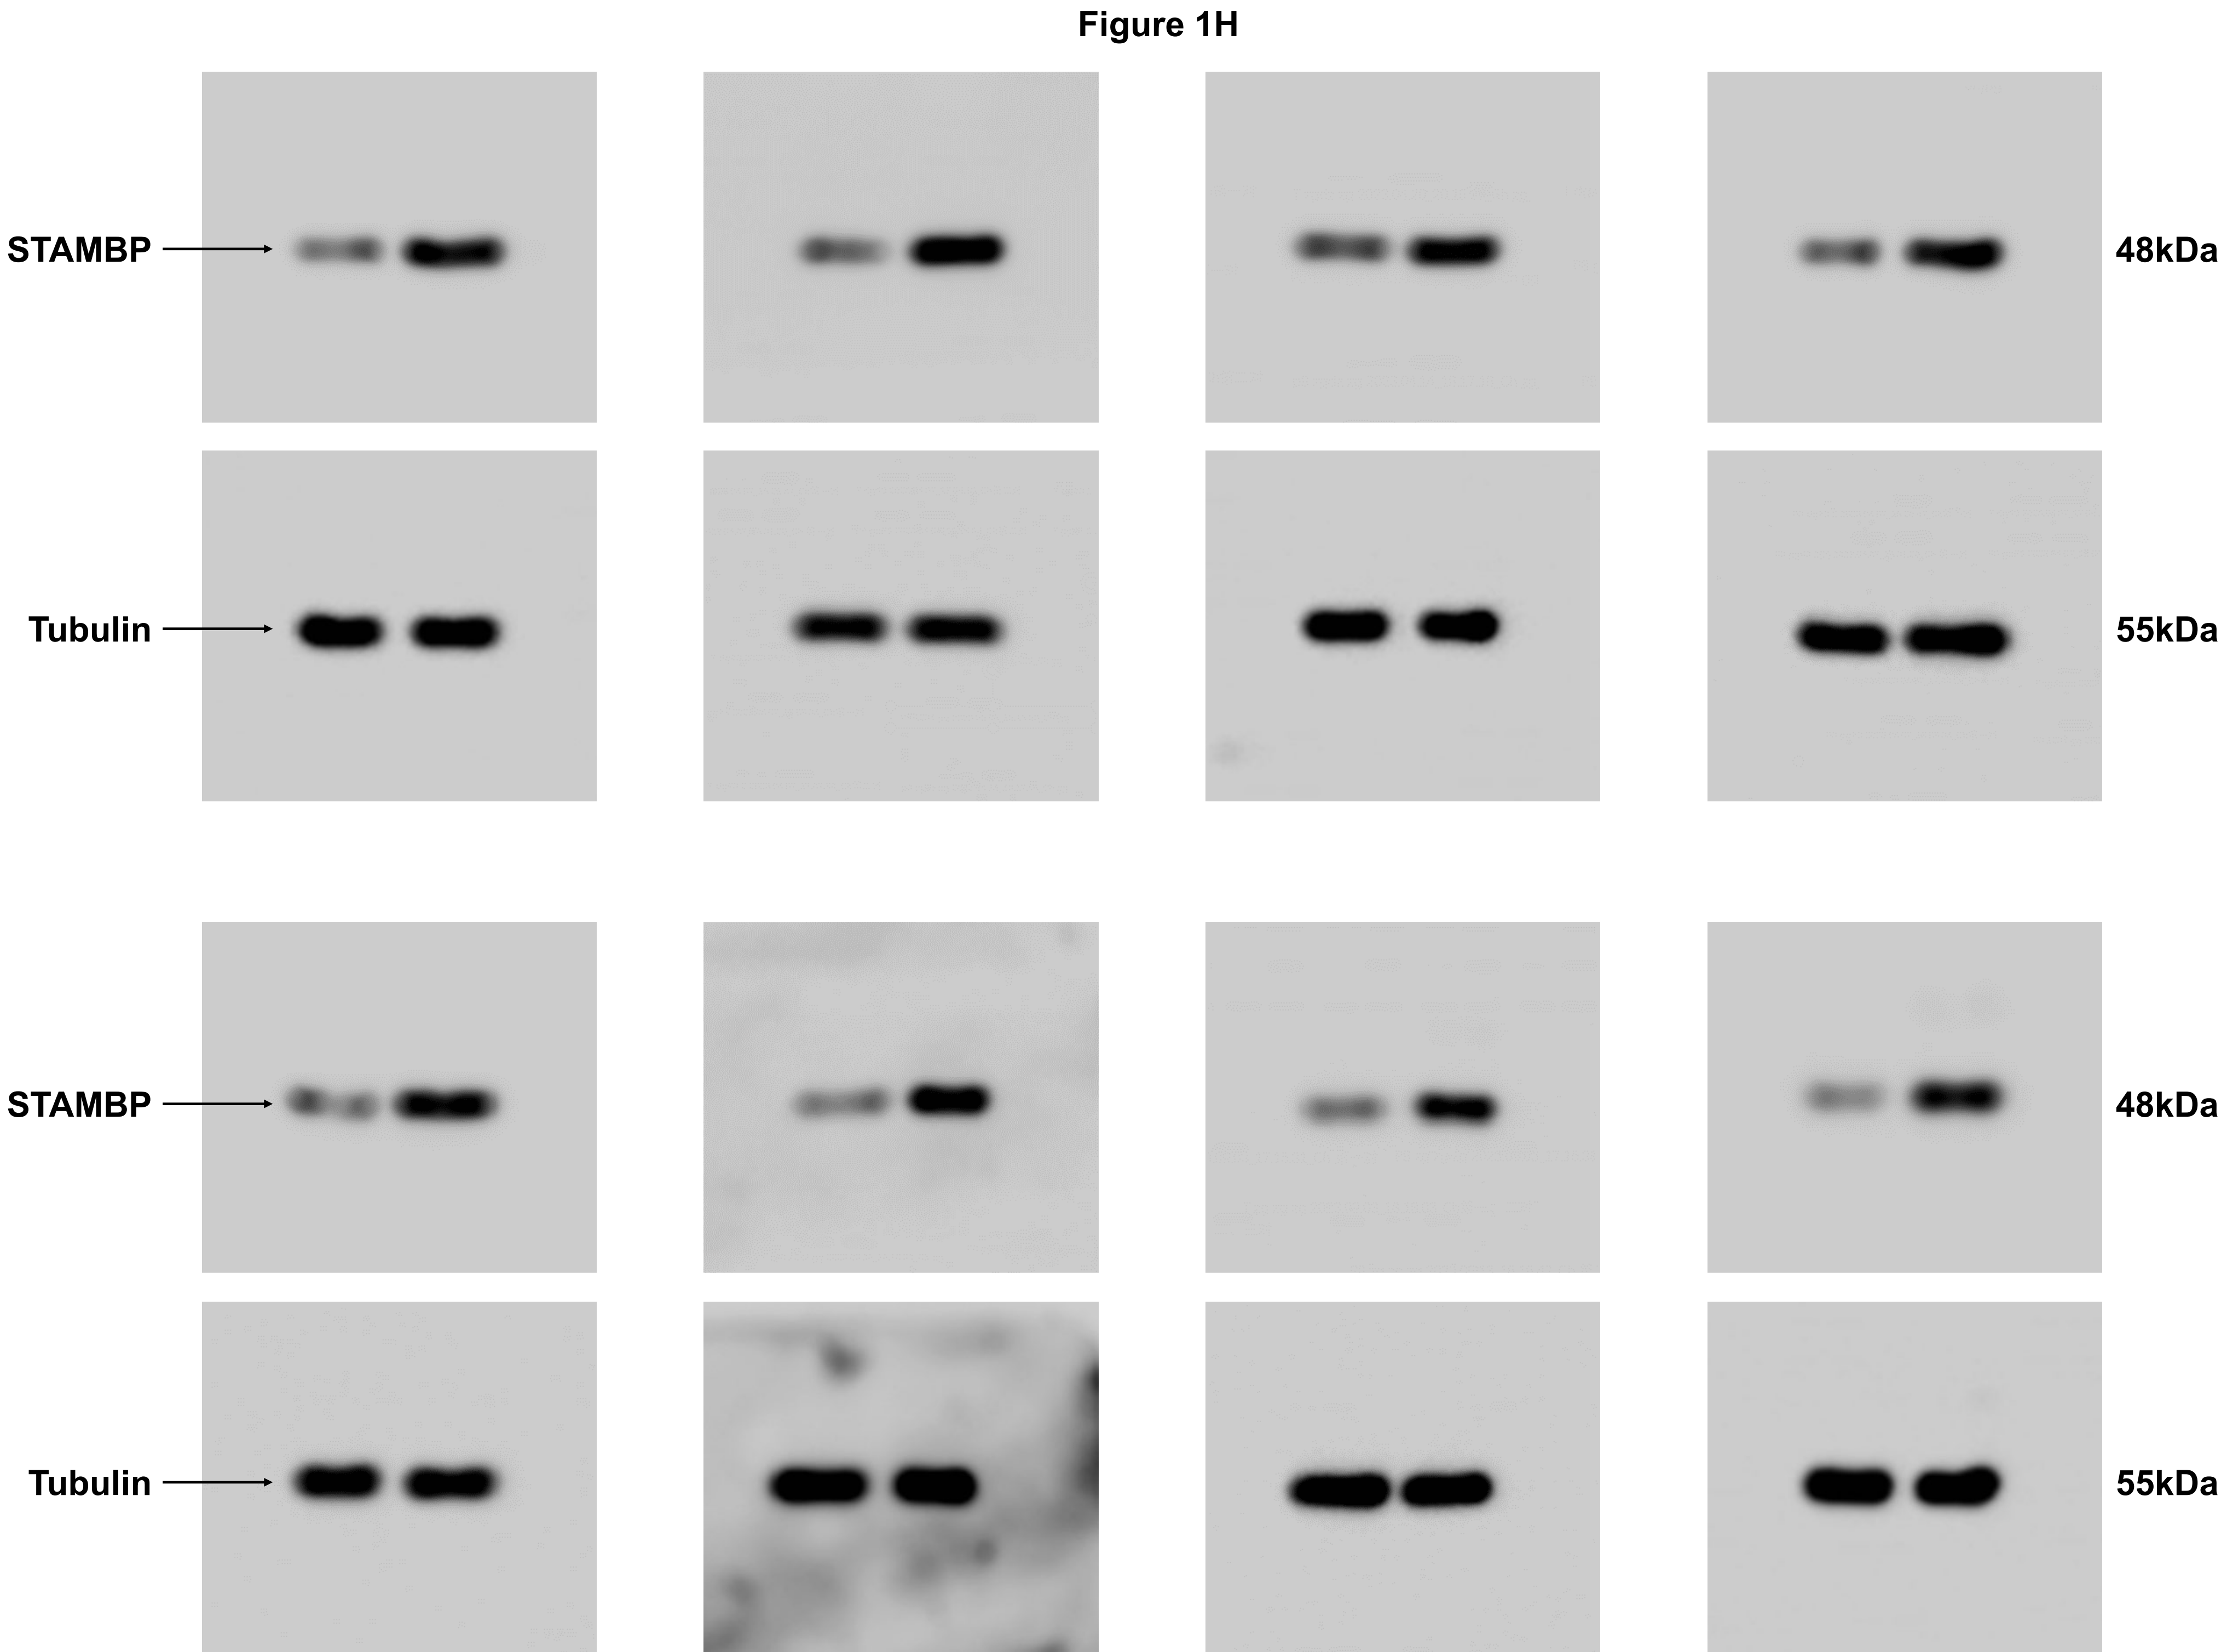

Full and uncropped western blot for Figure 2

Figure 2B

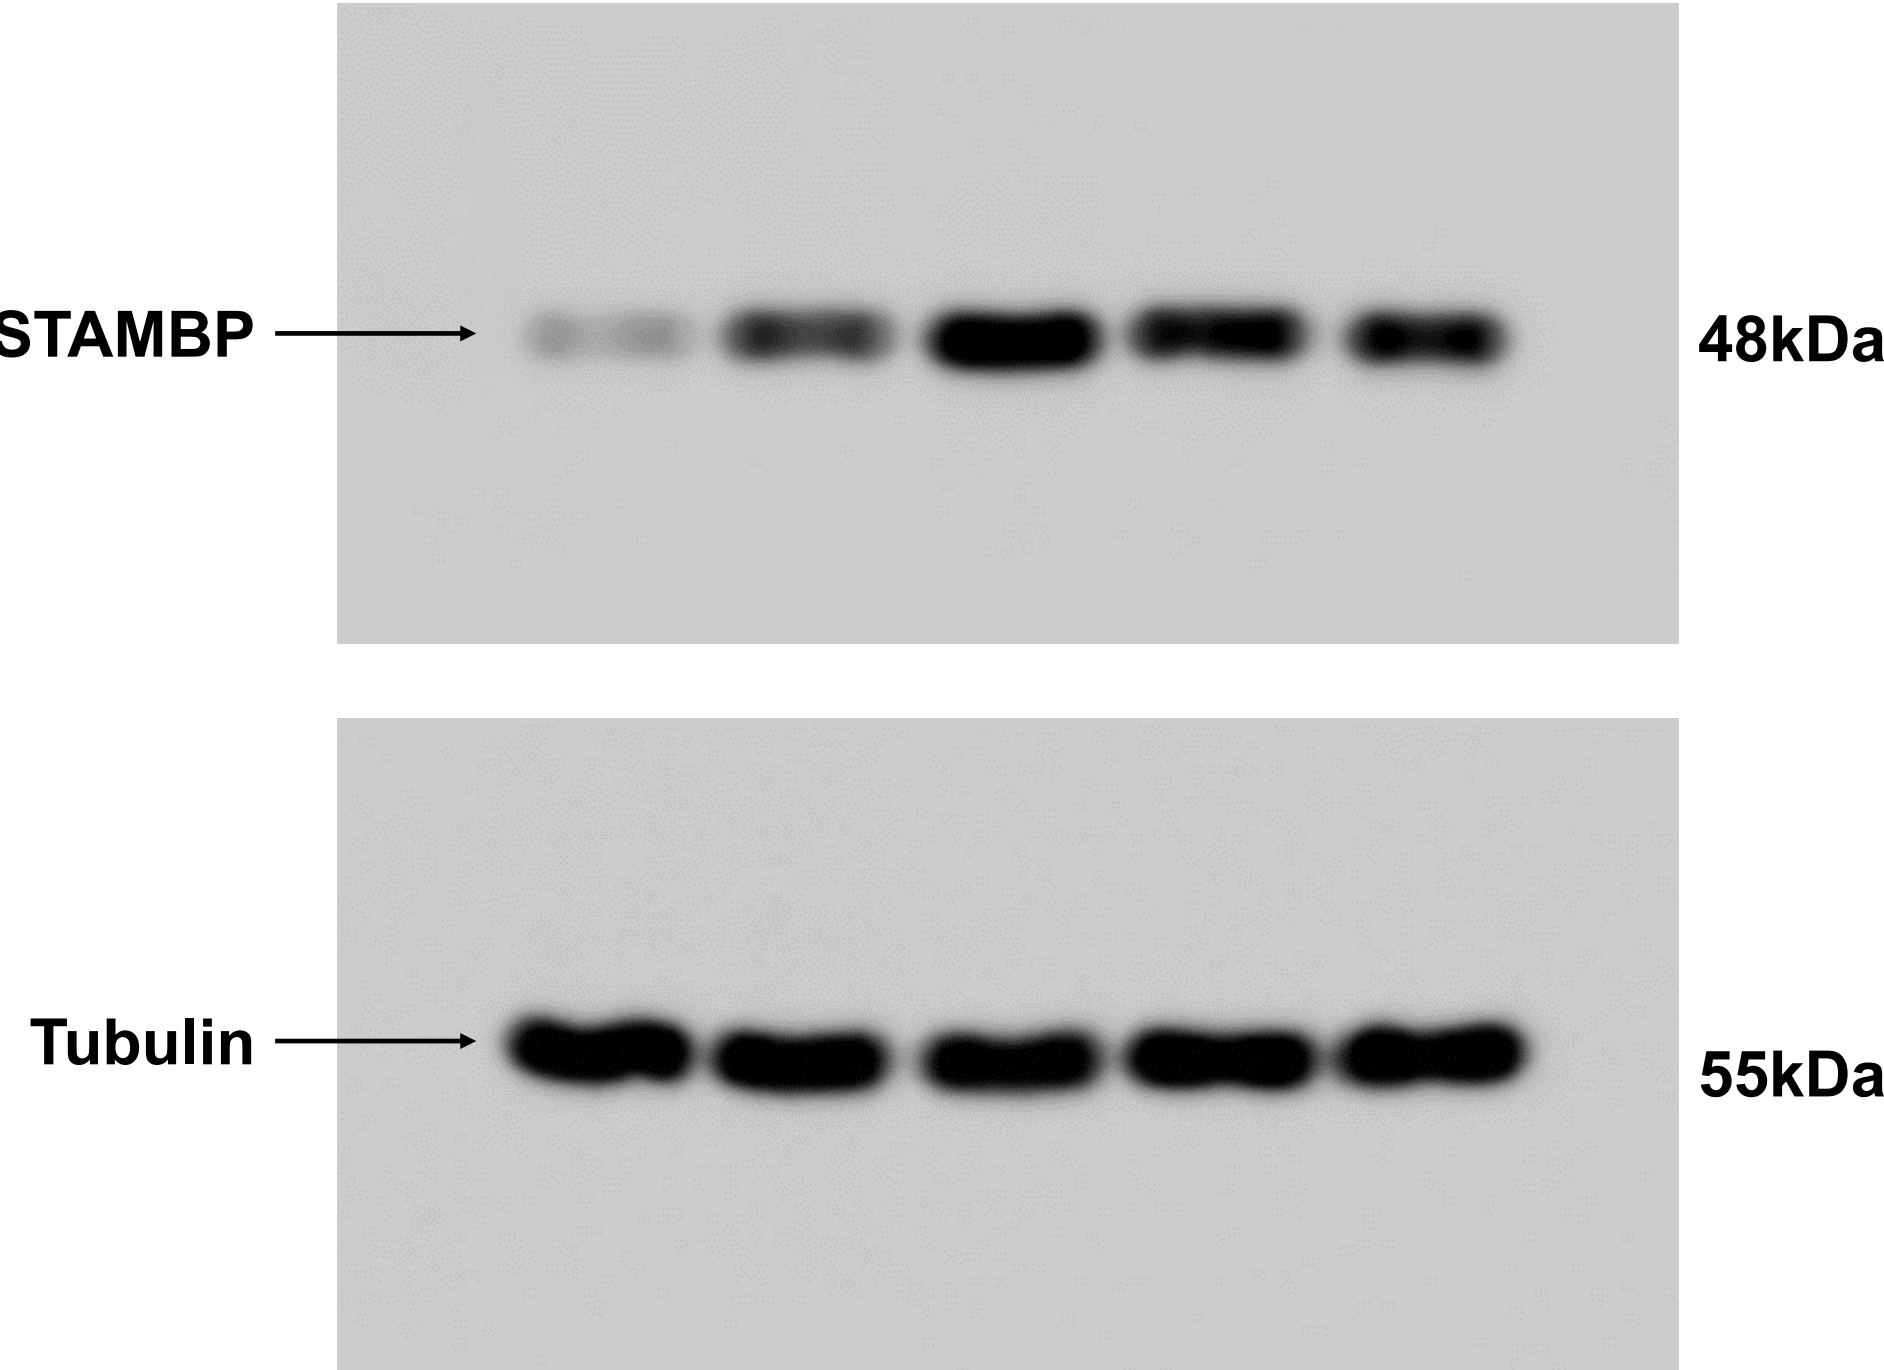

Figure 2H

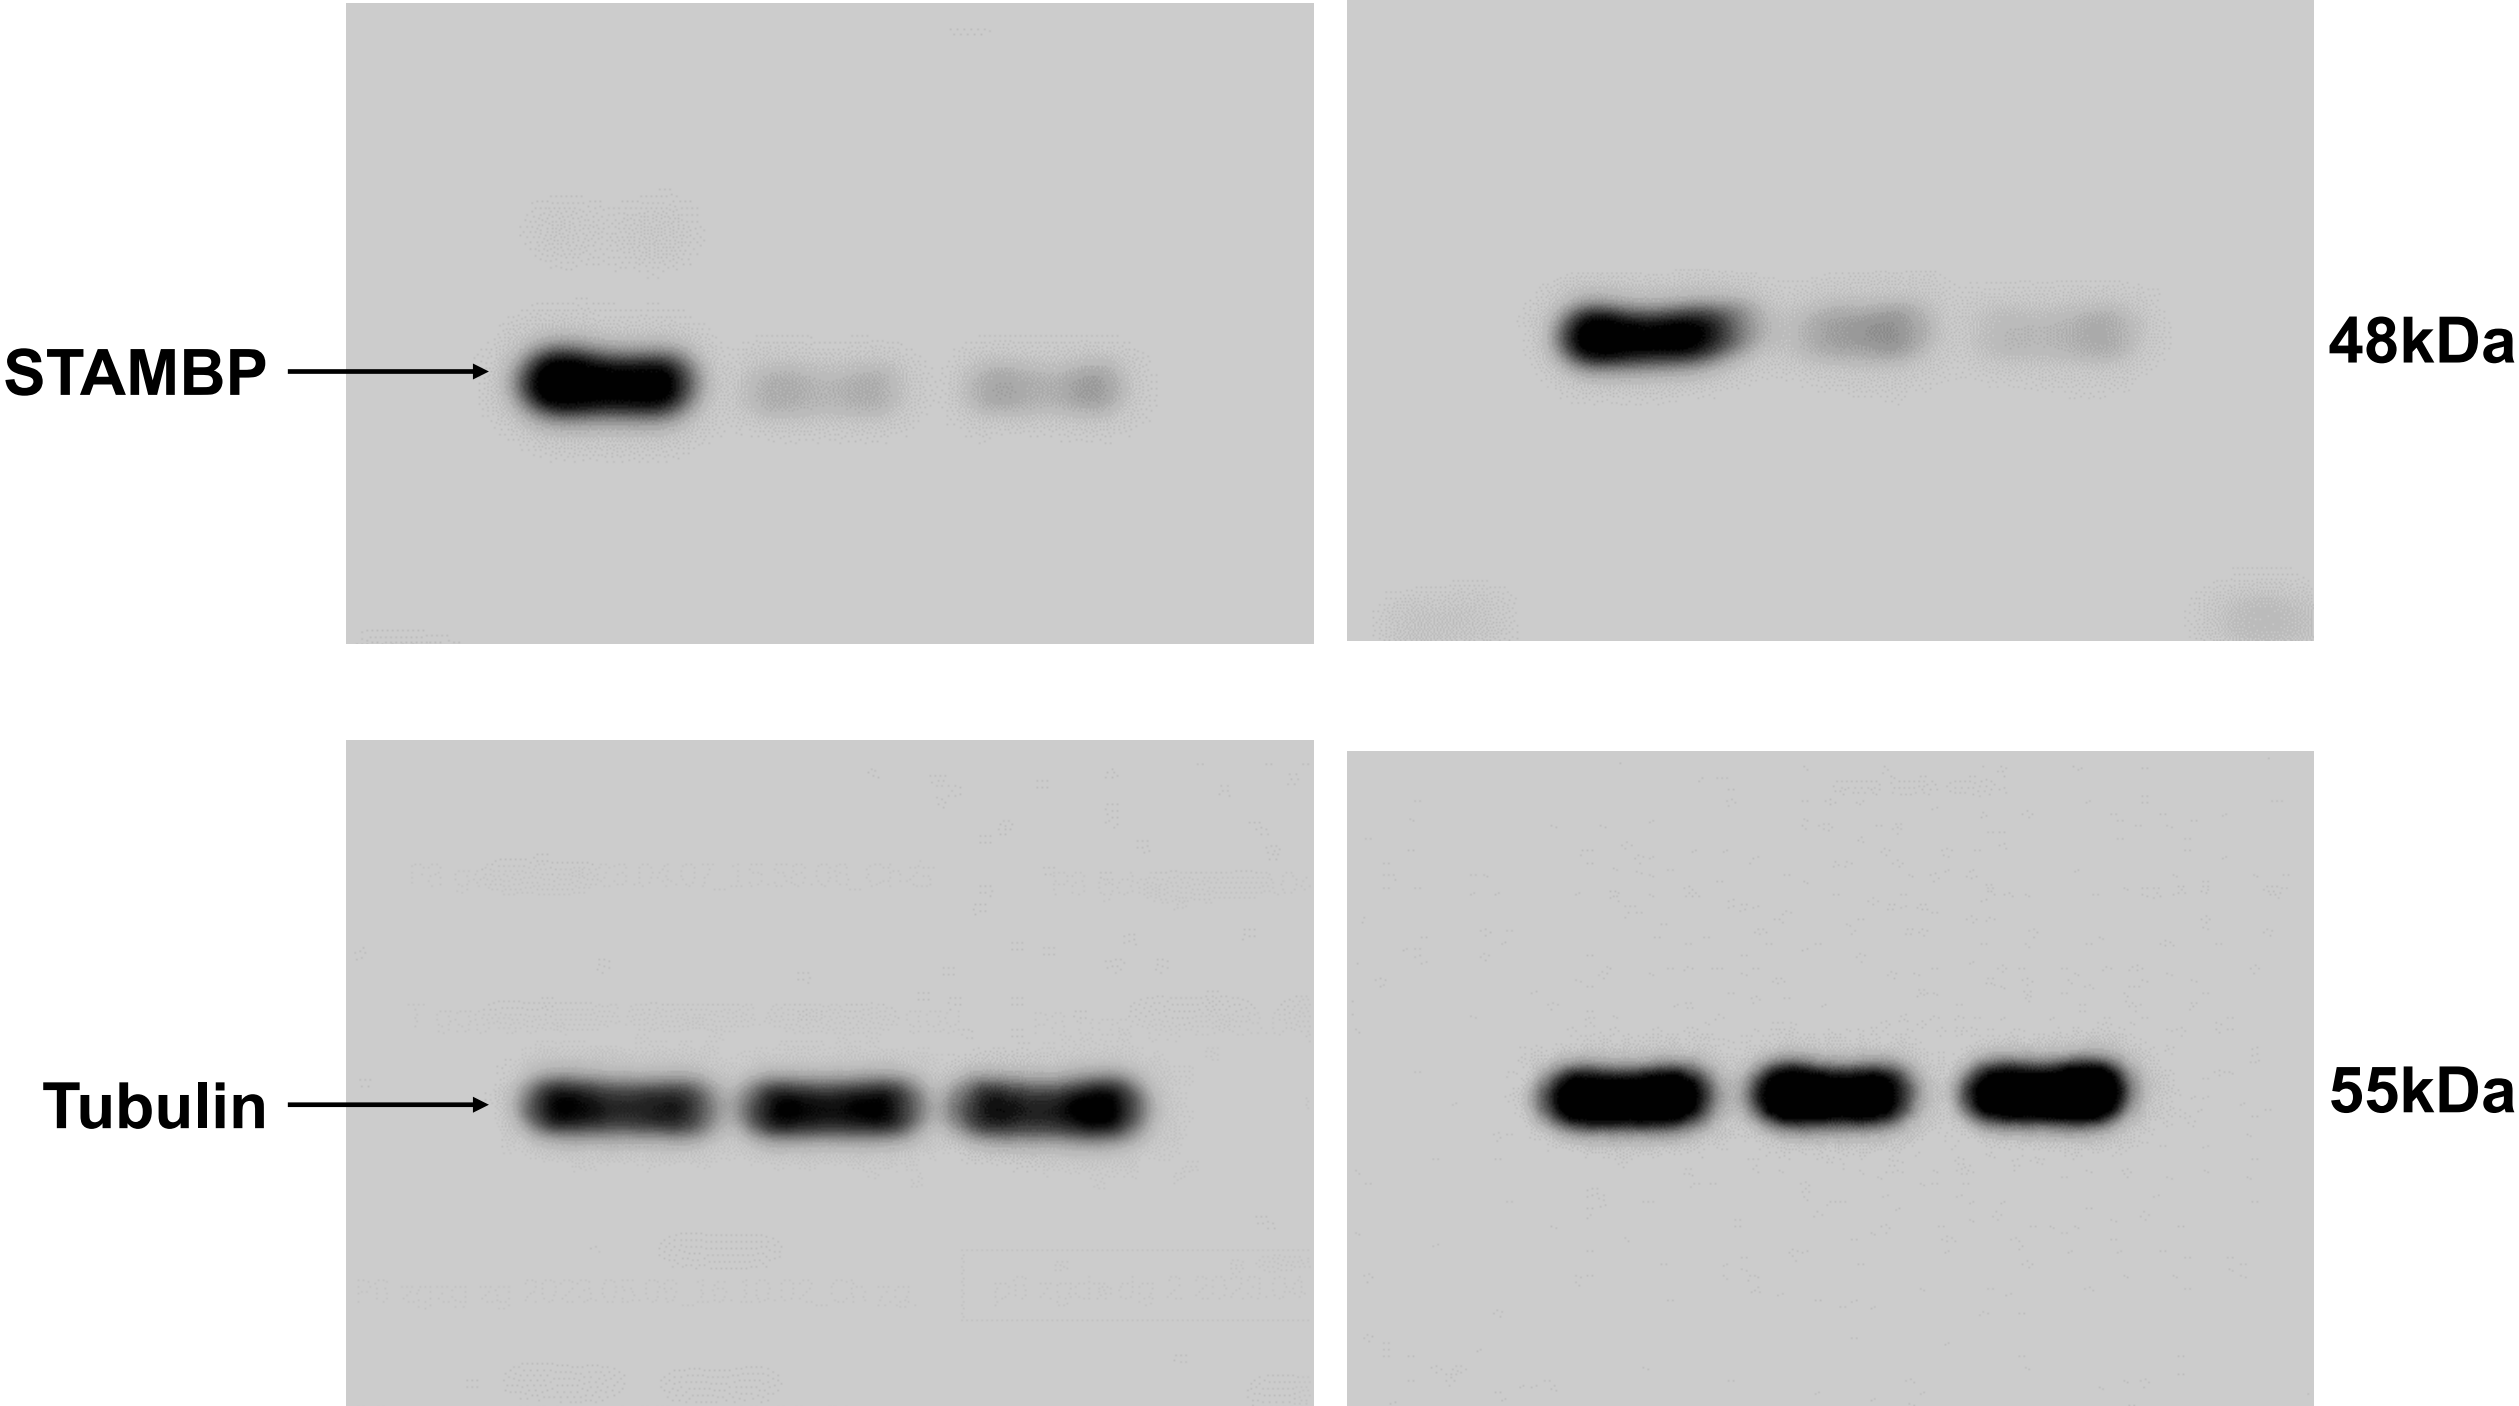

Figure 2F

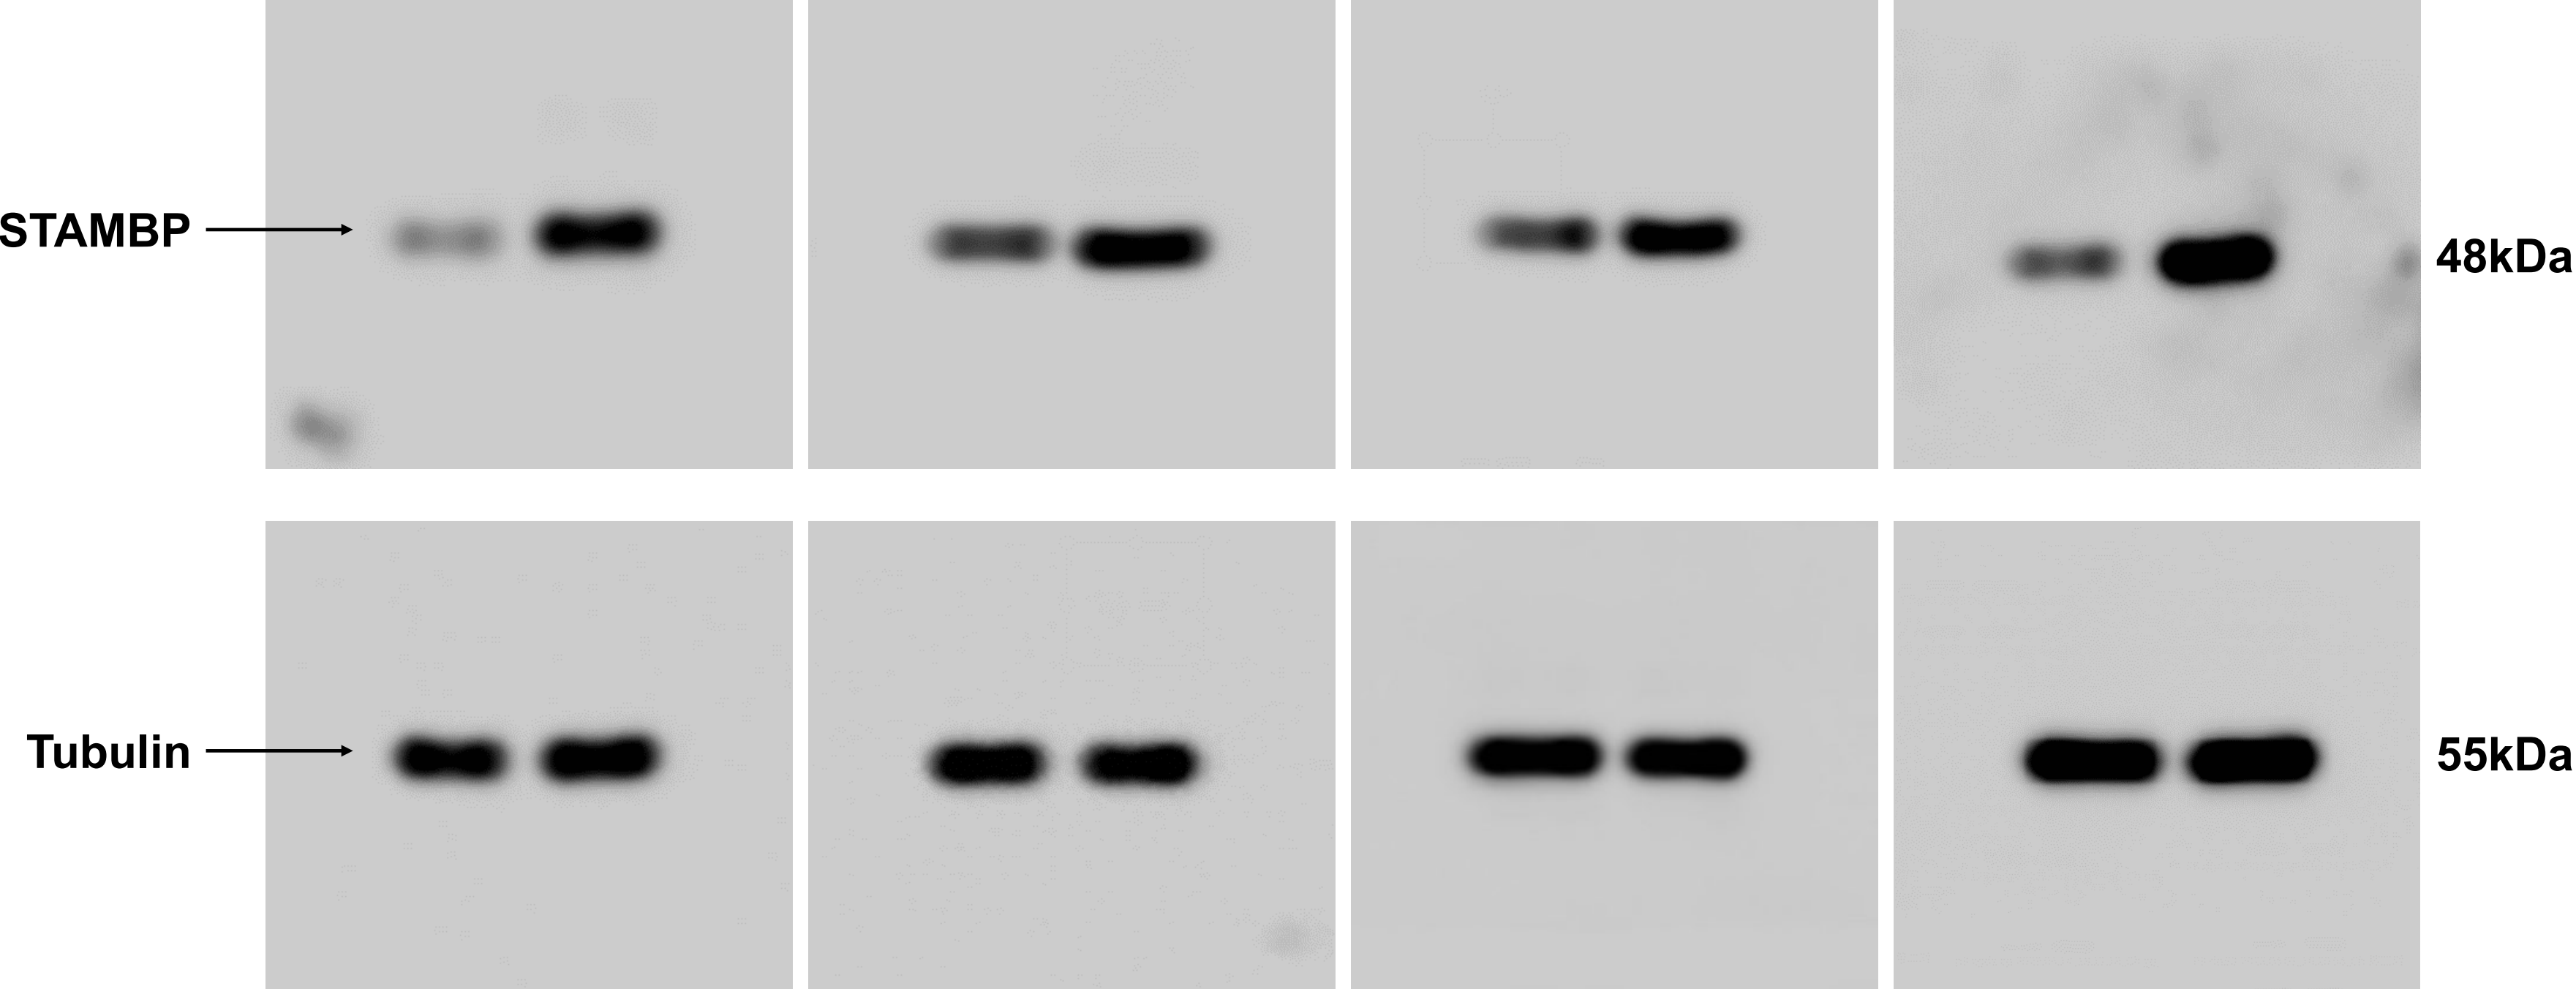



Full and uncropped western blot for Figure 4

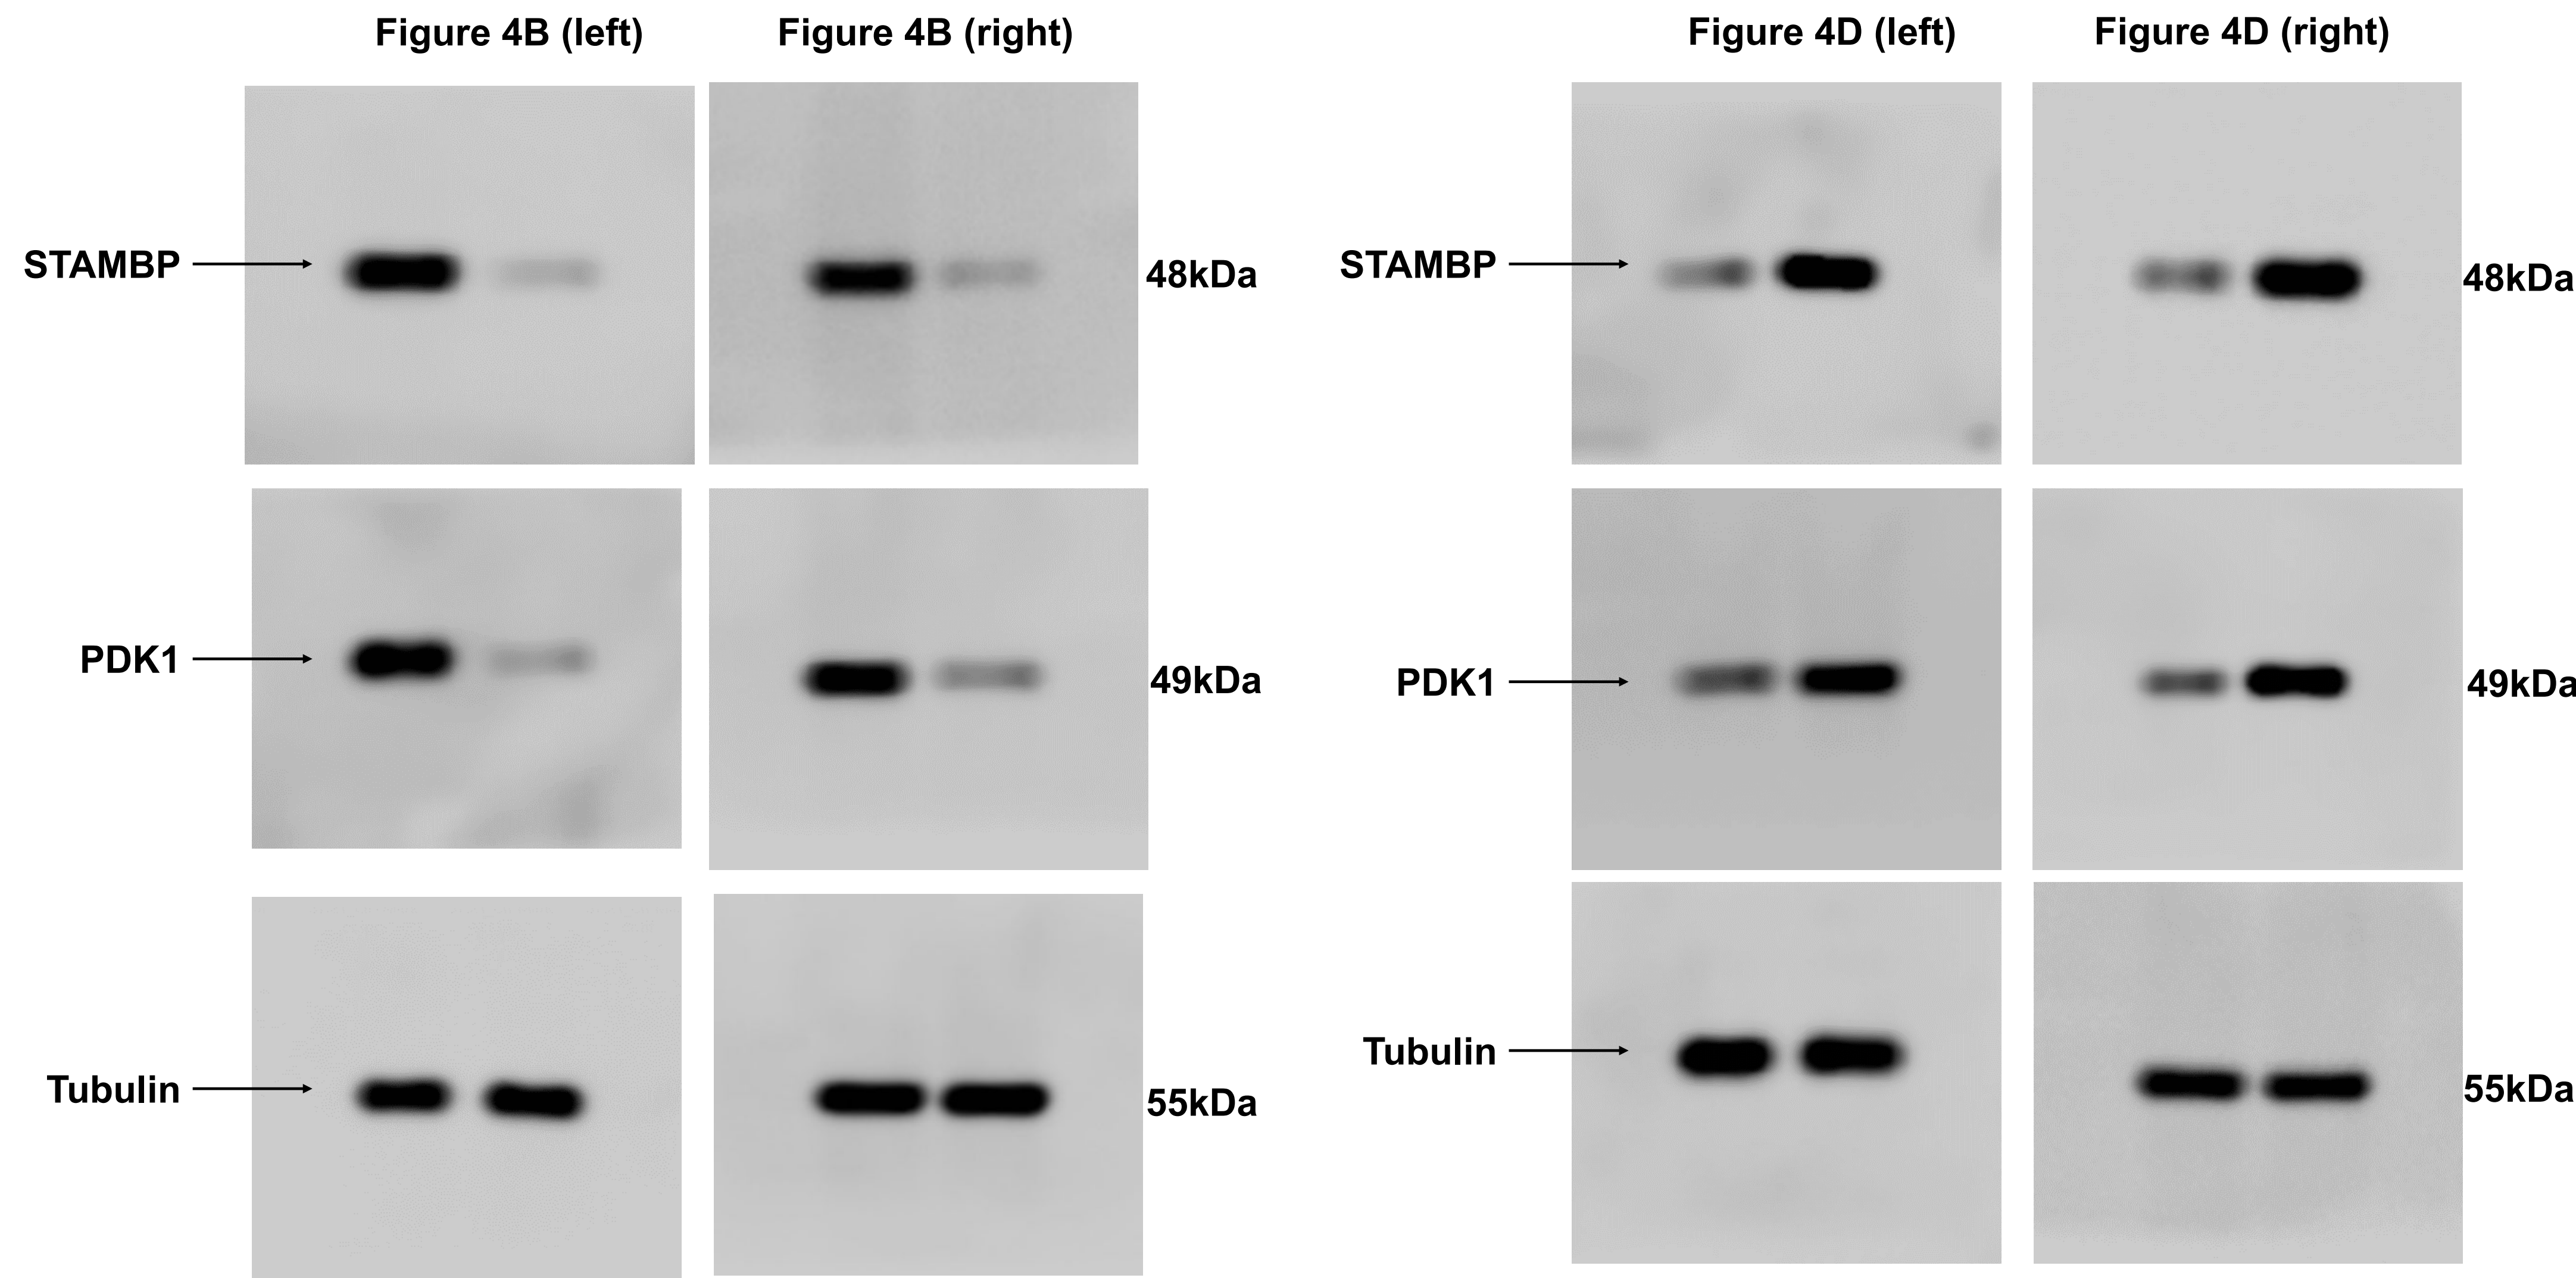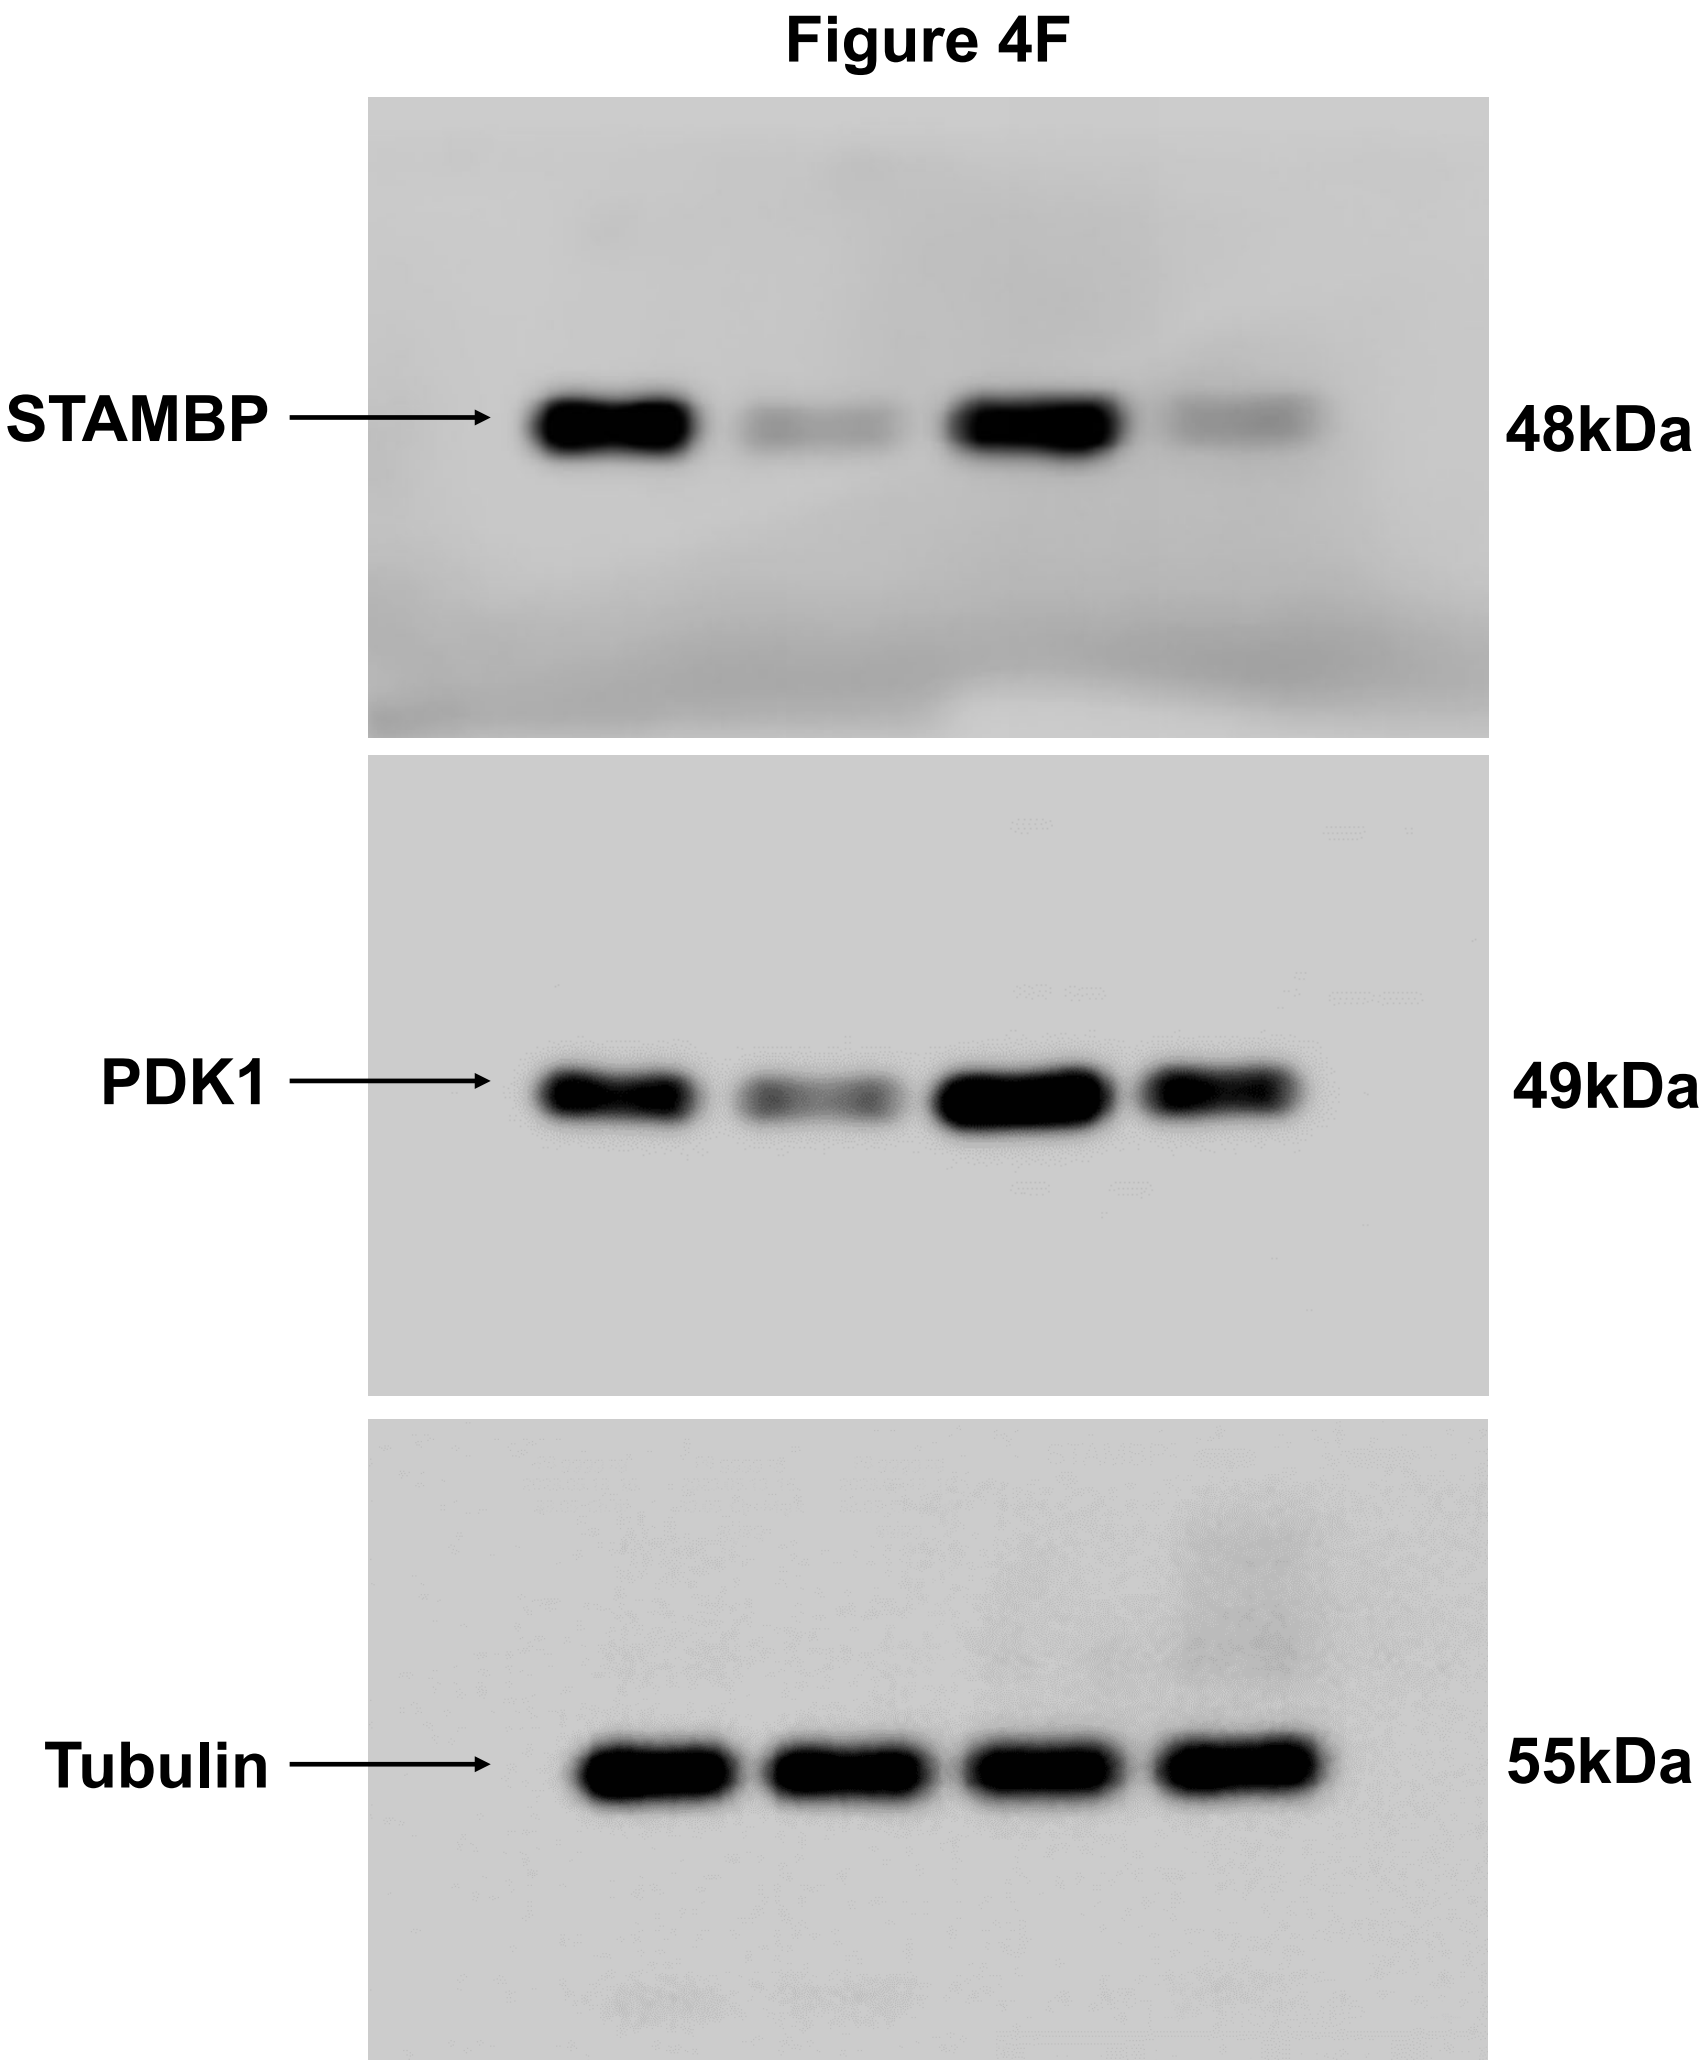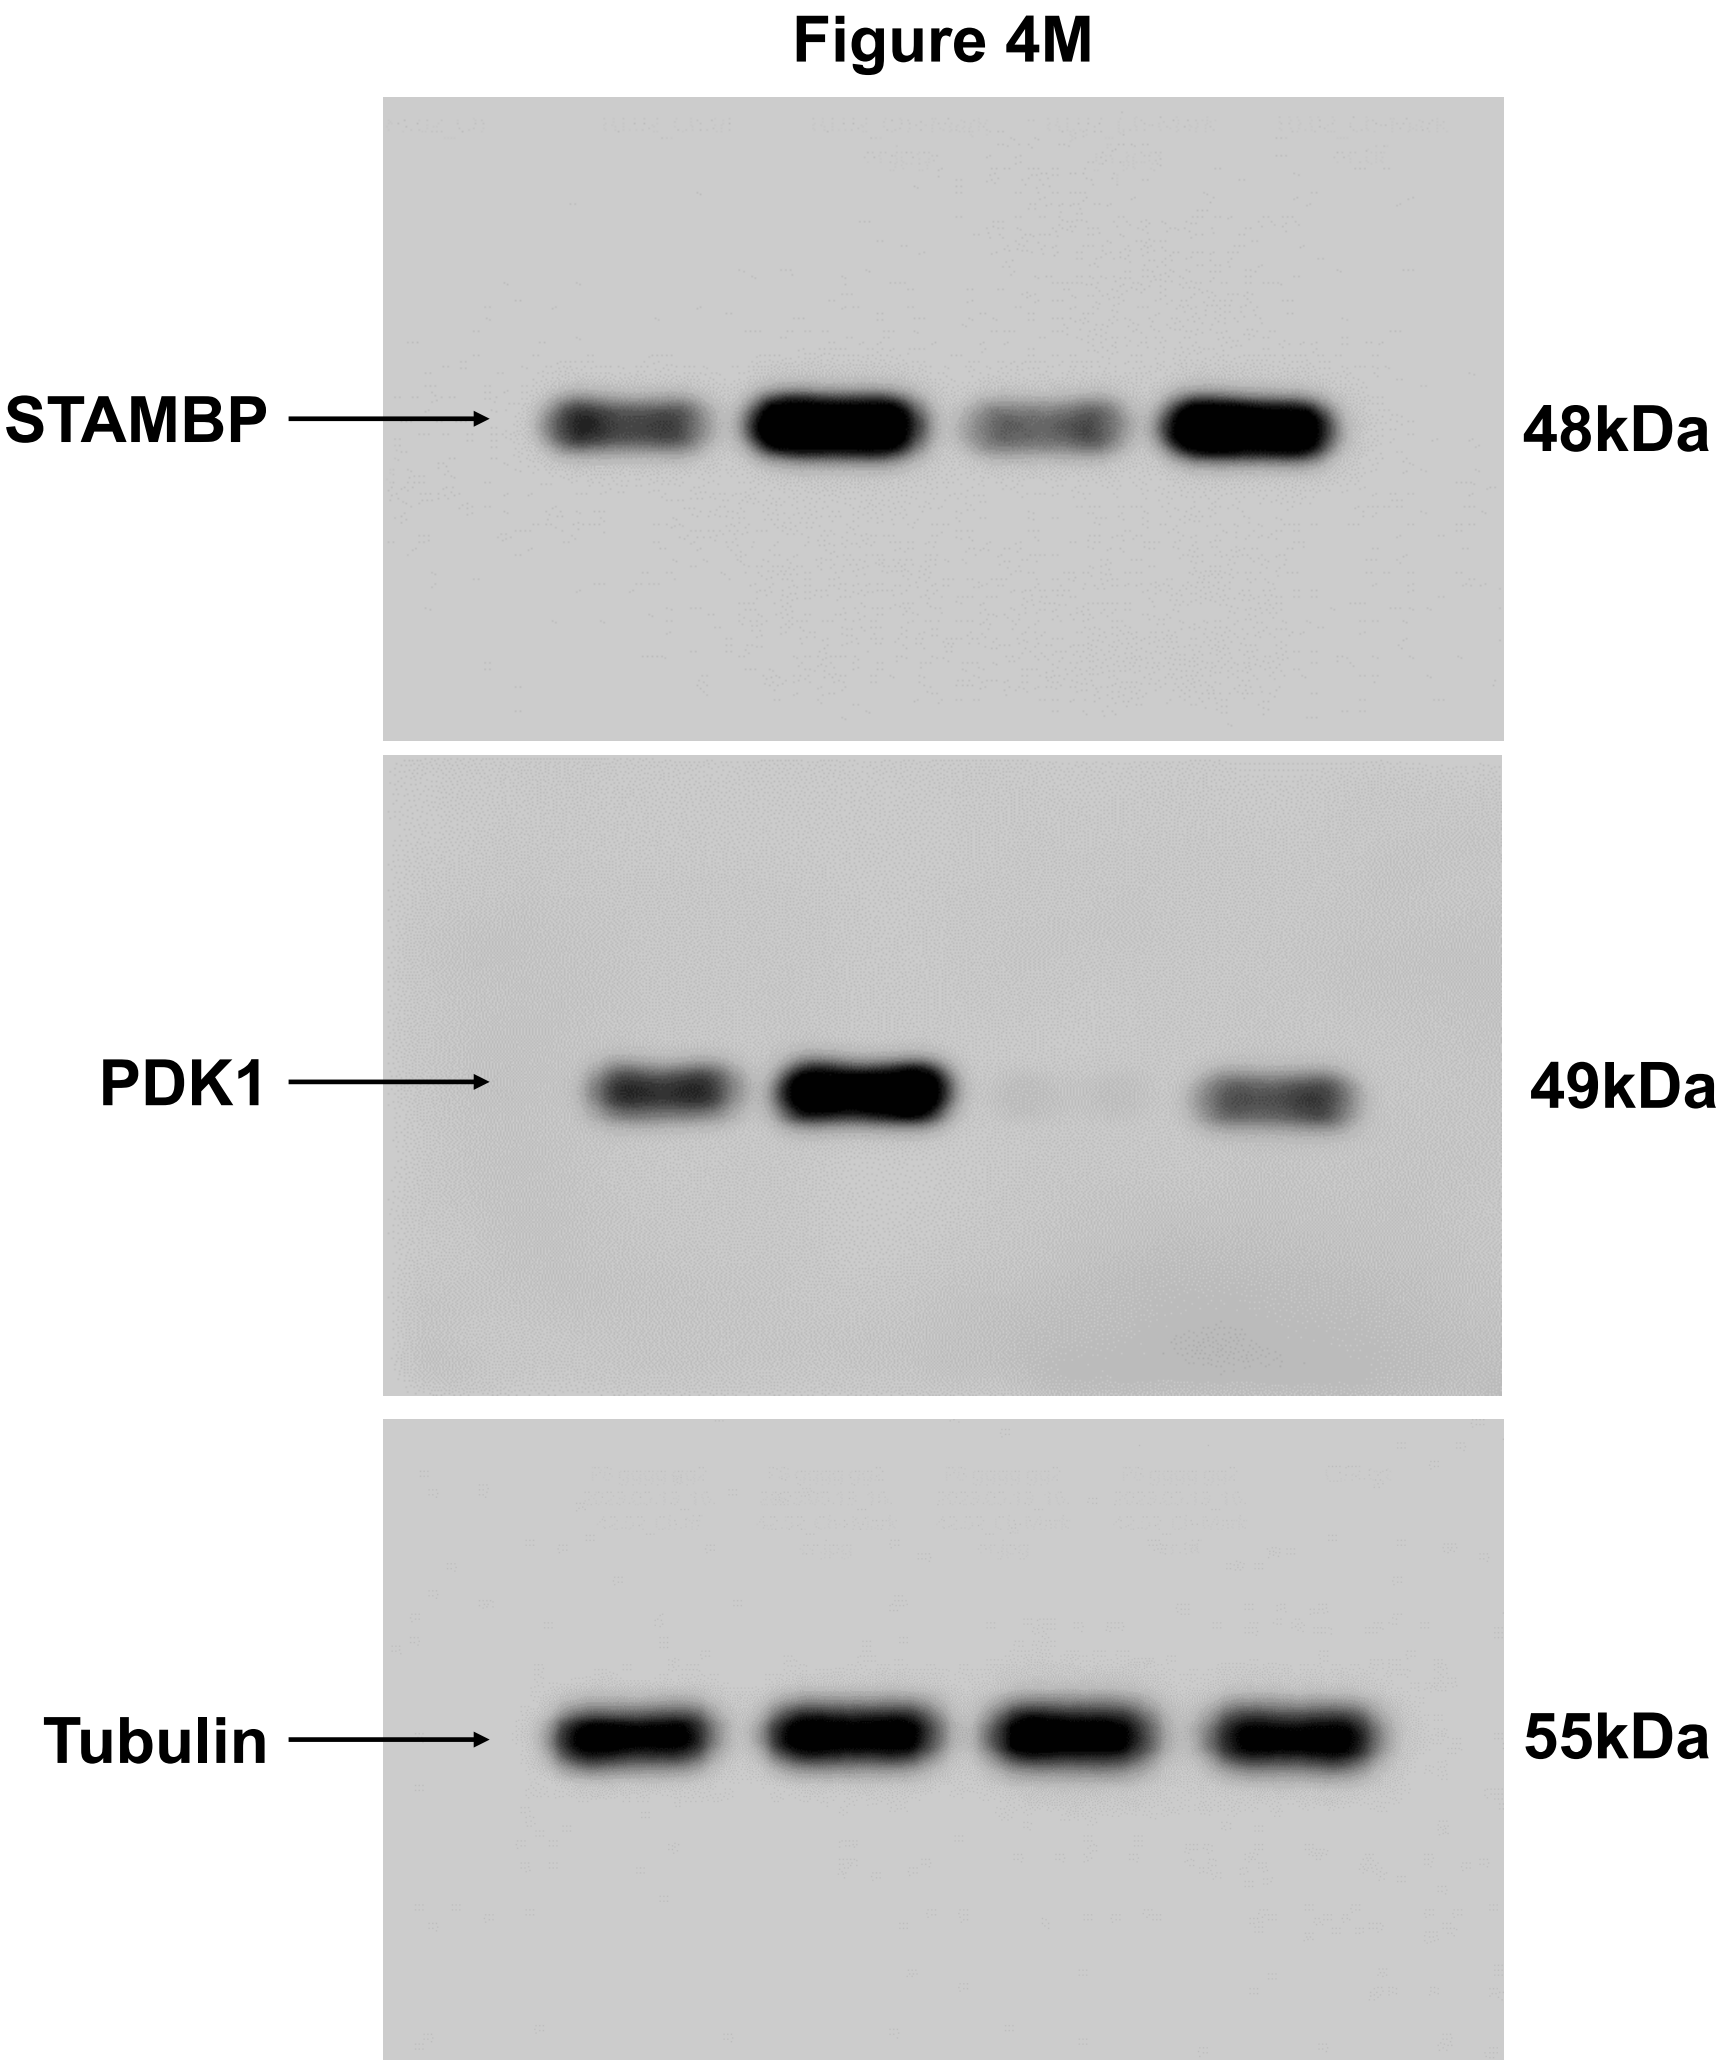



Full and uncropped western blot for Figure 5

Figure 5A (top)

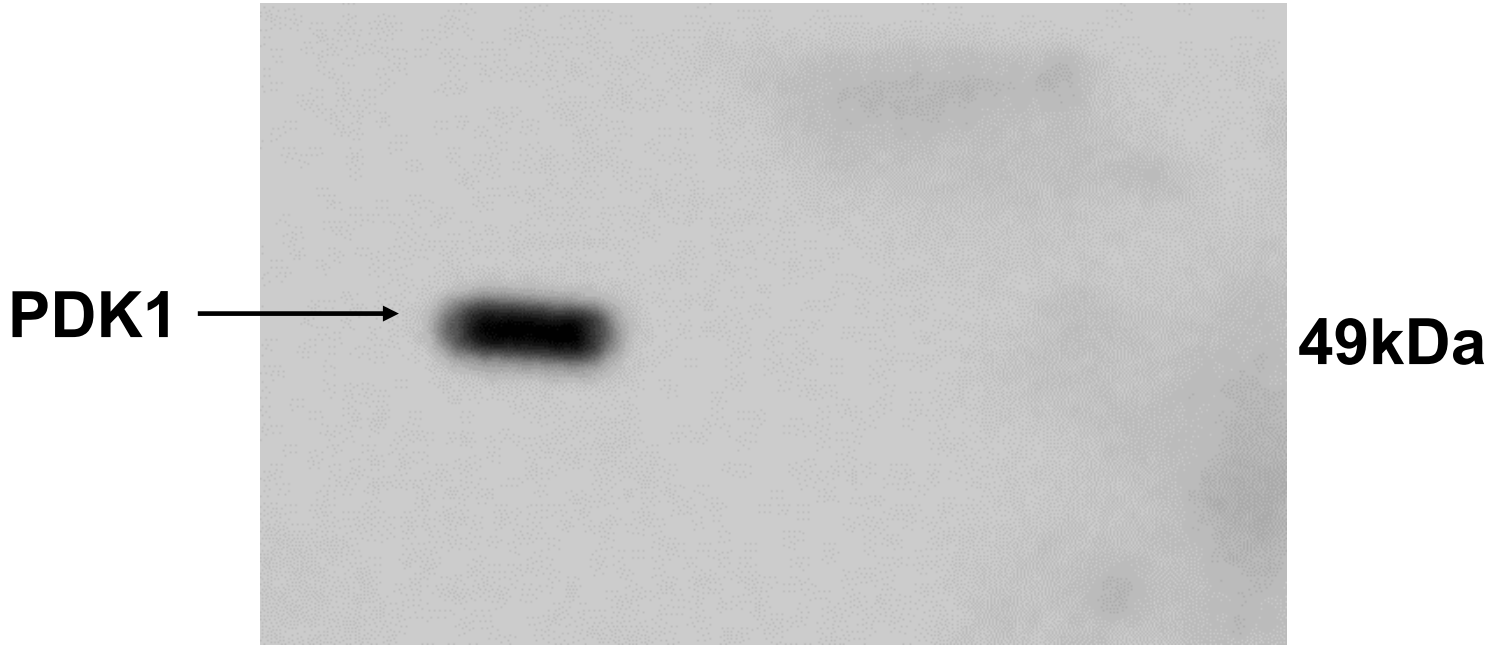

Figure 5E

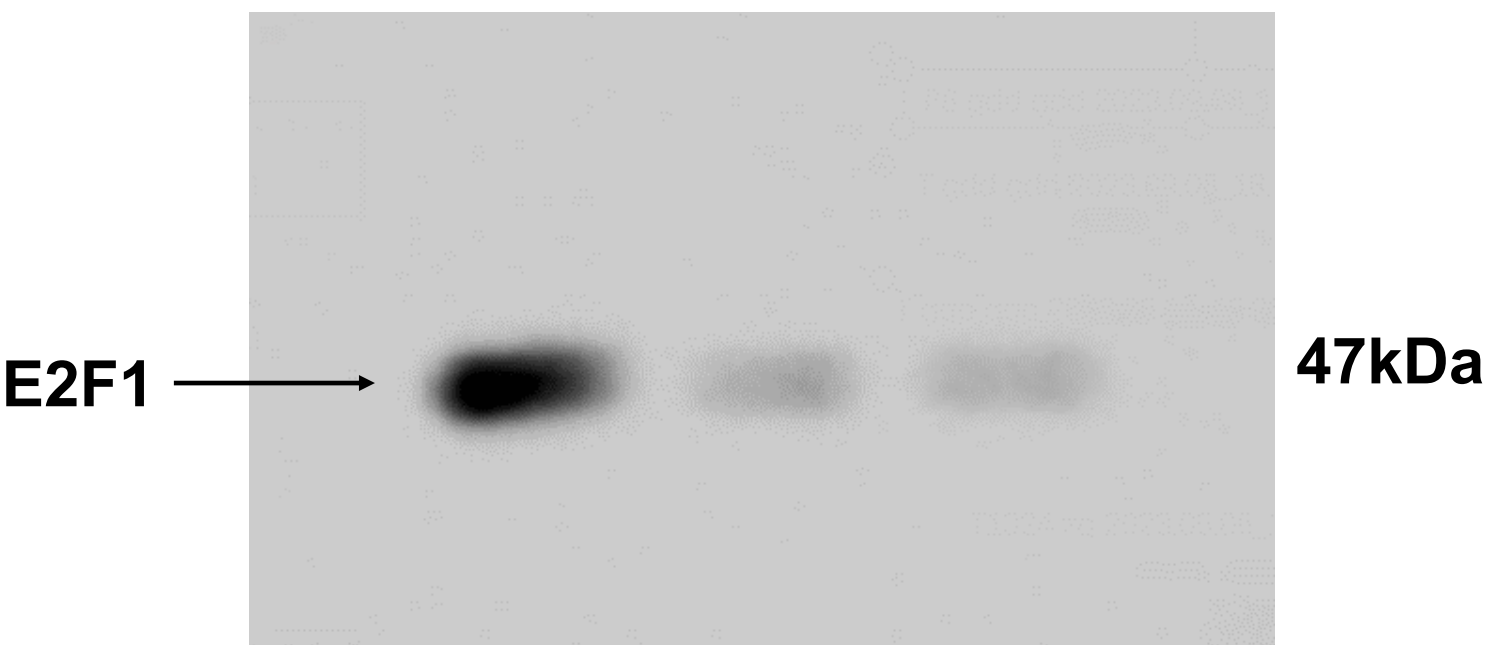

Figure 5G

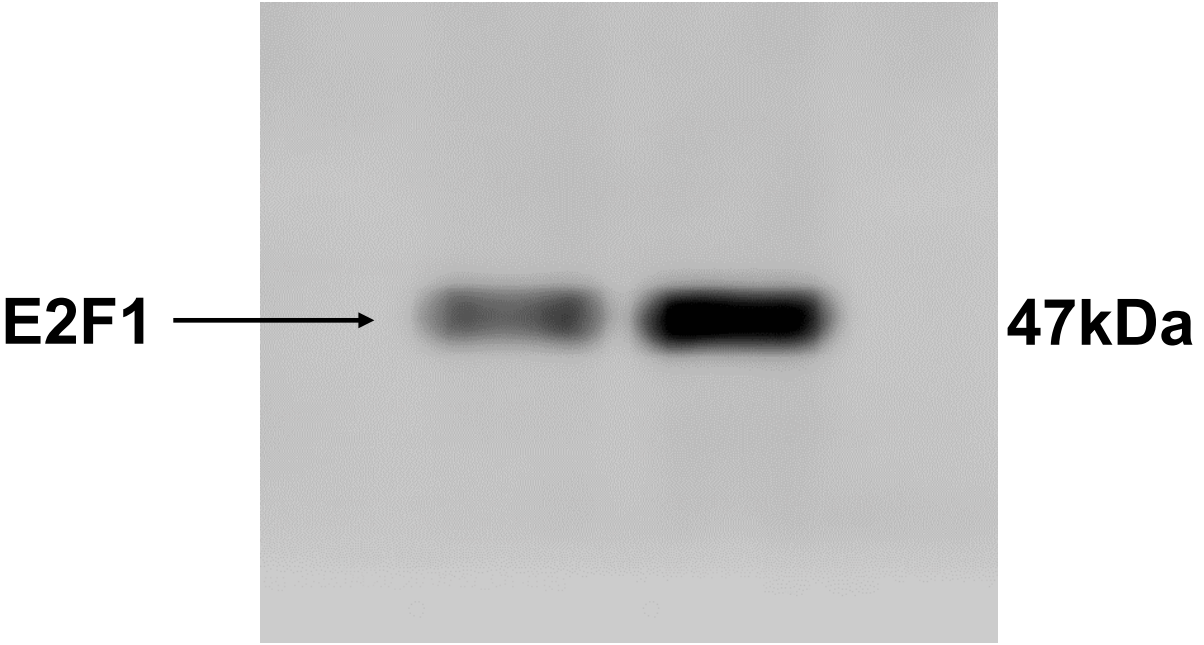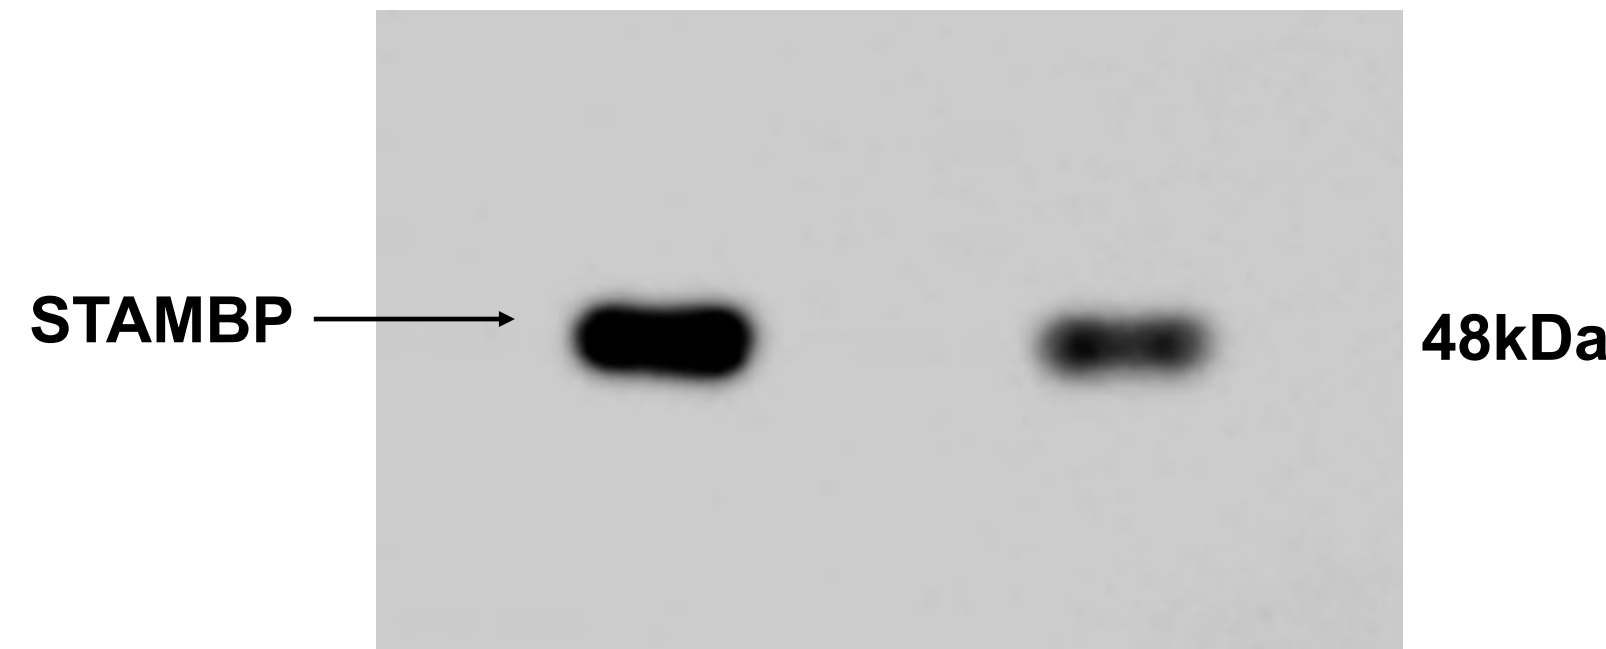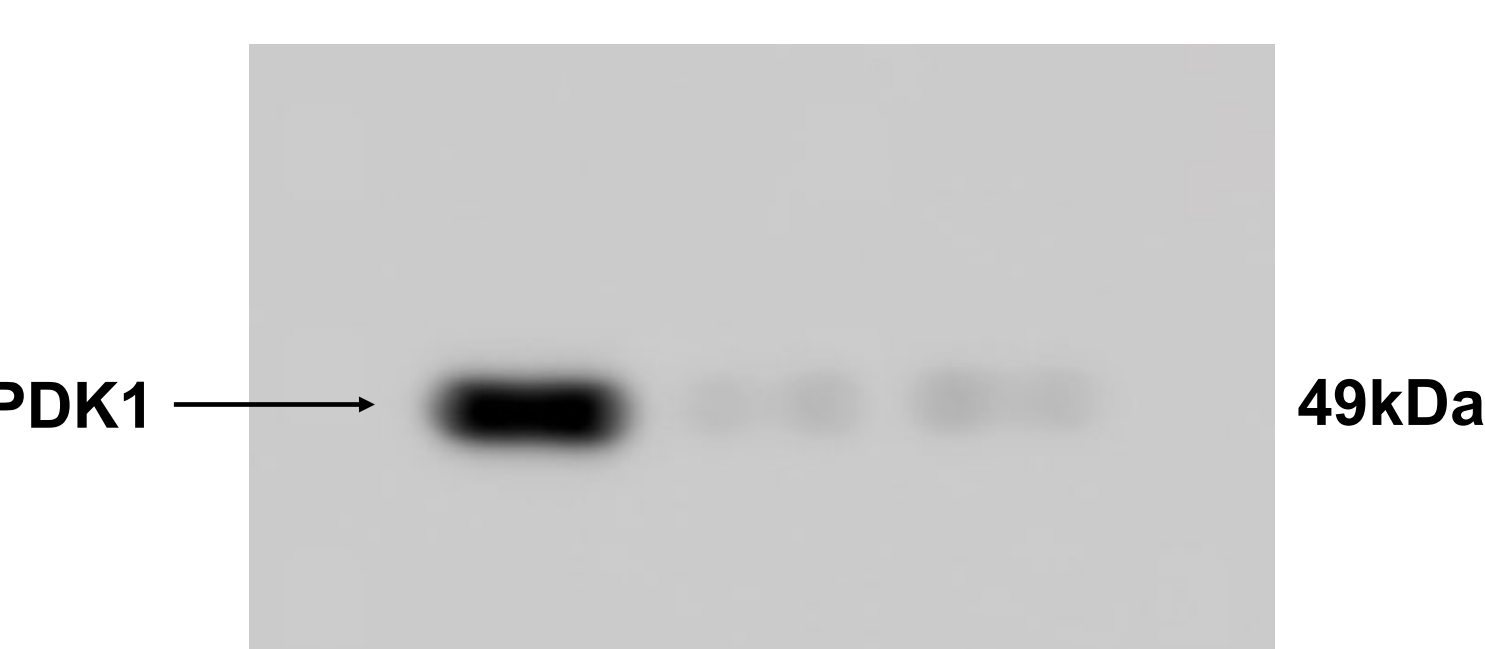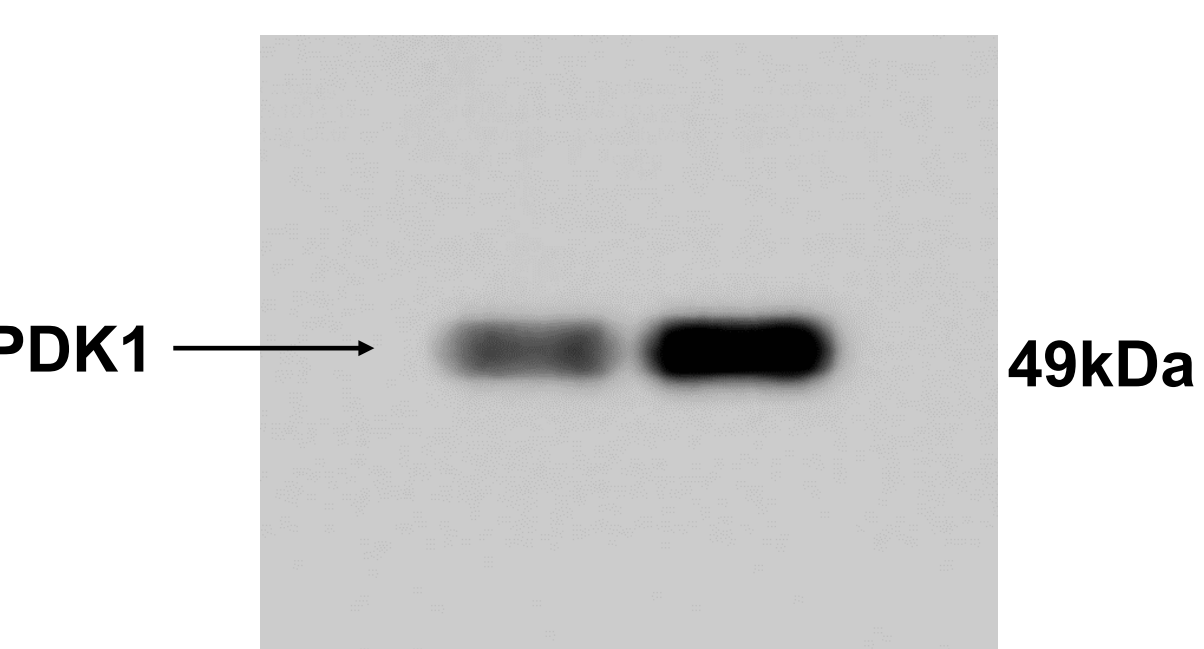

Figure 5A (bottom)

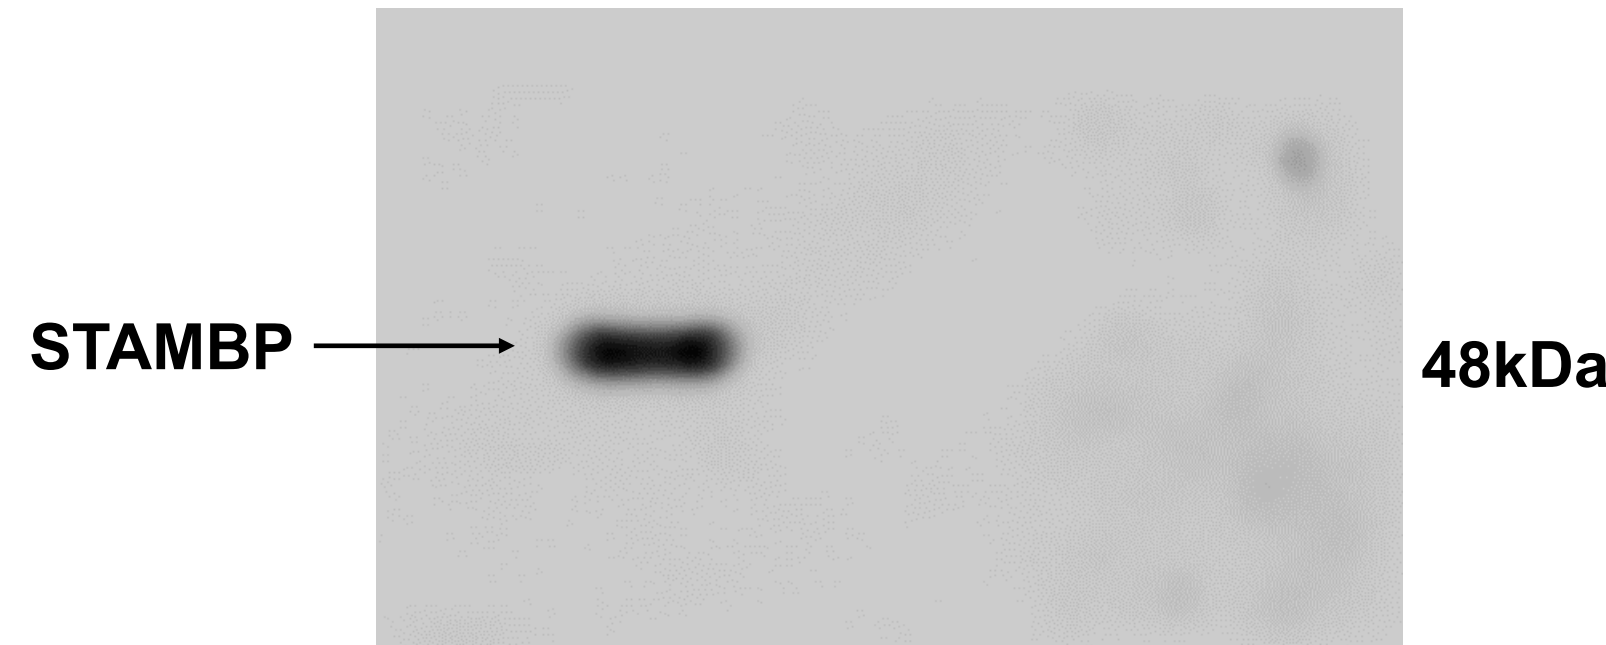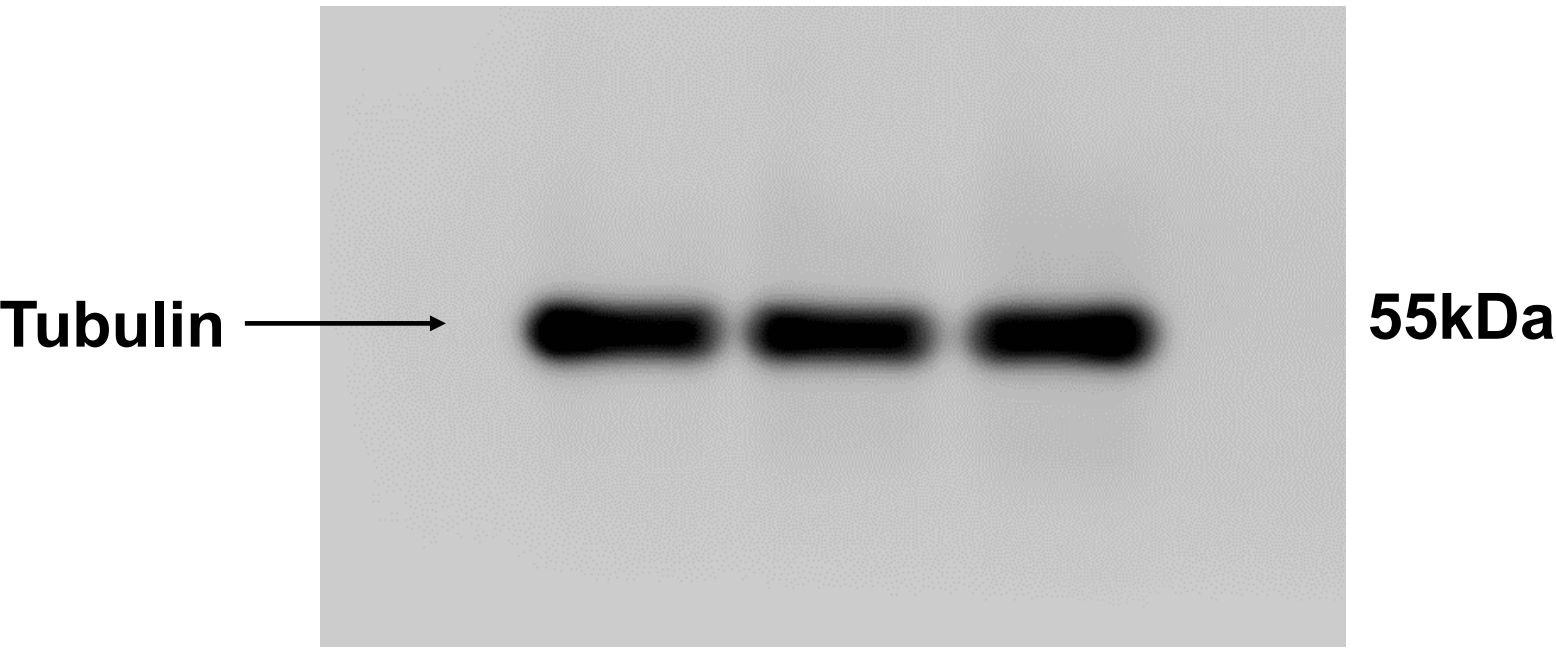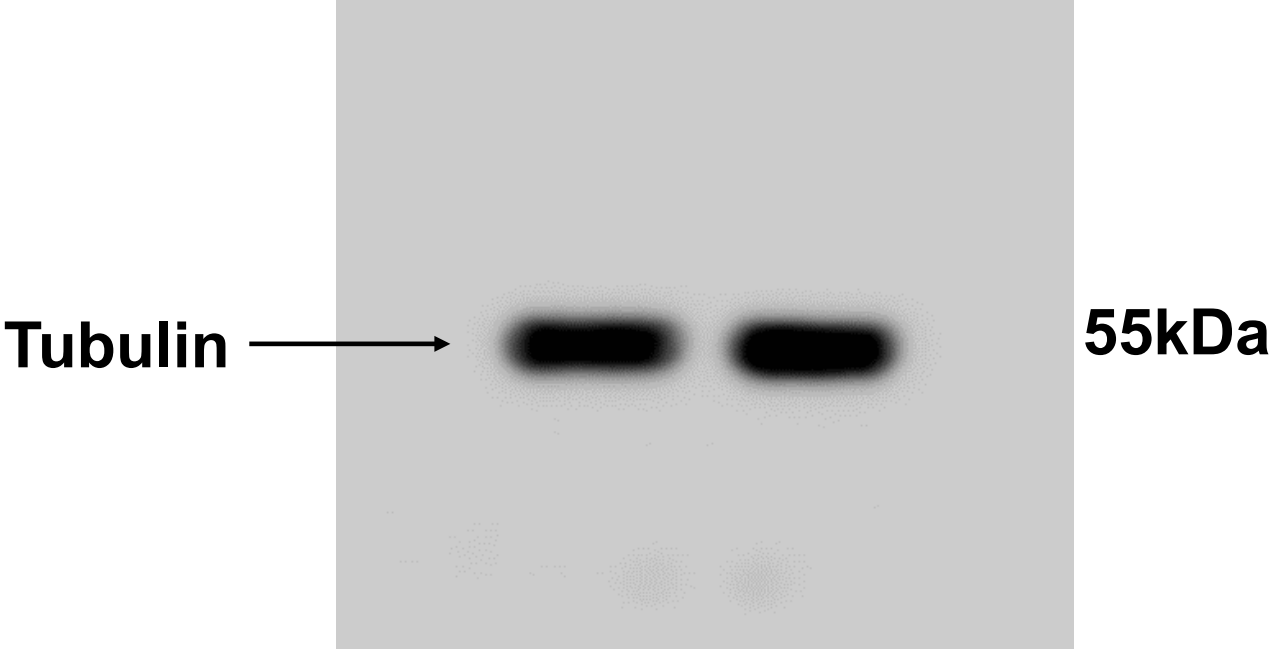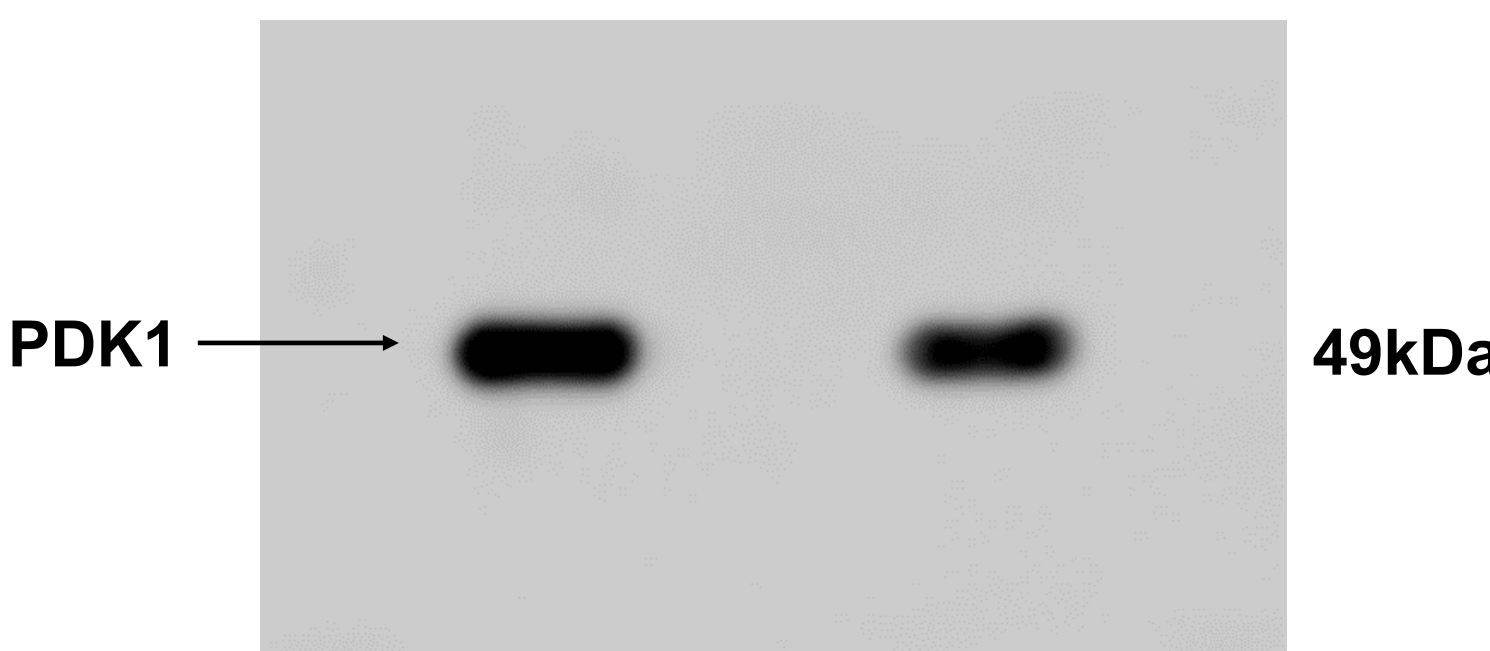

Full and uncropped western blot for Figure 6

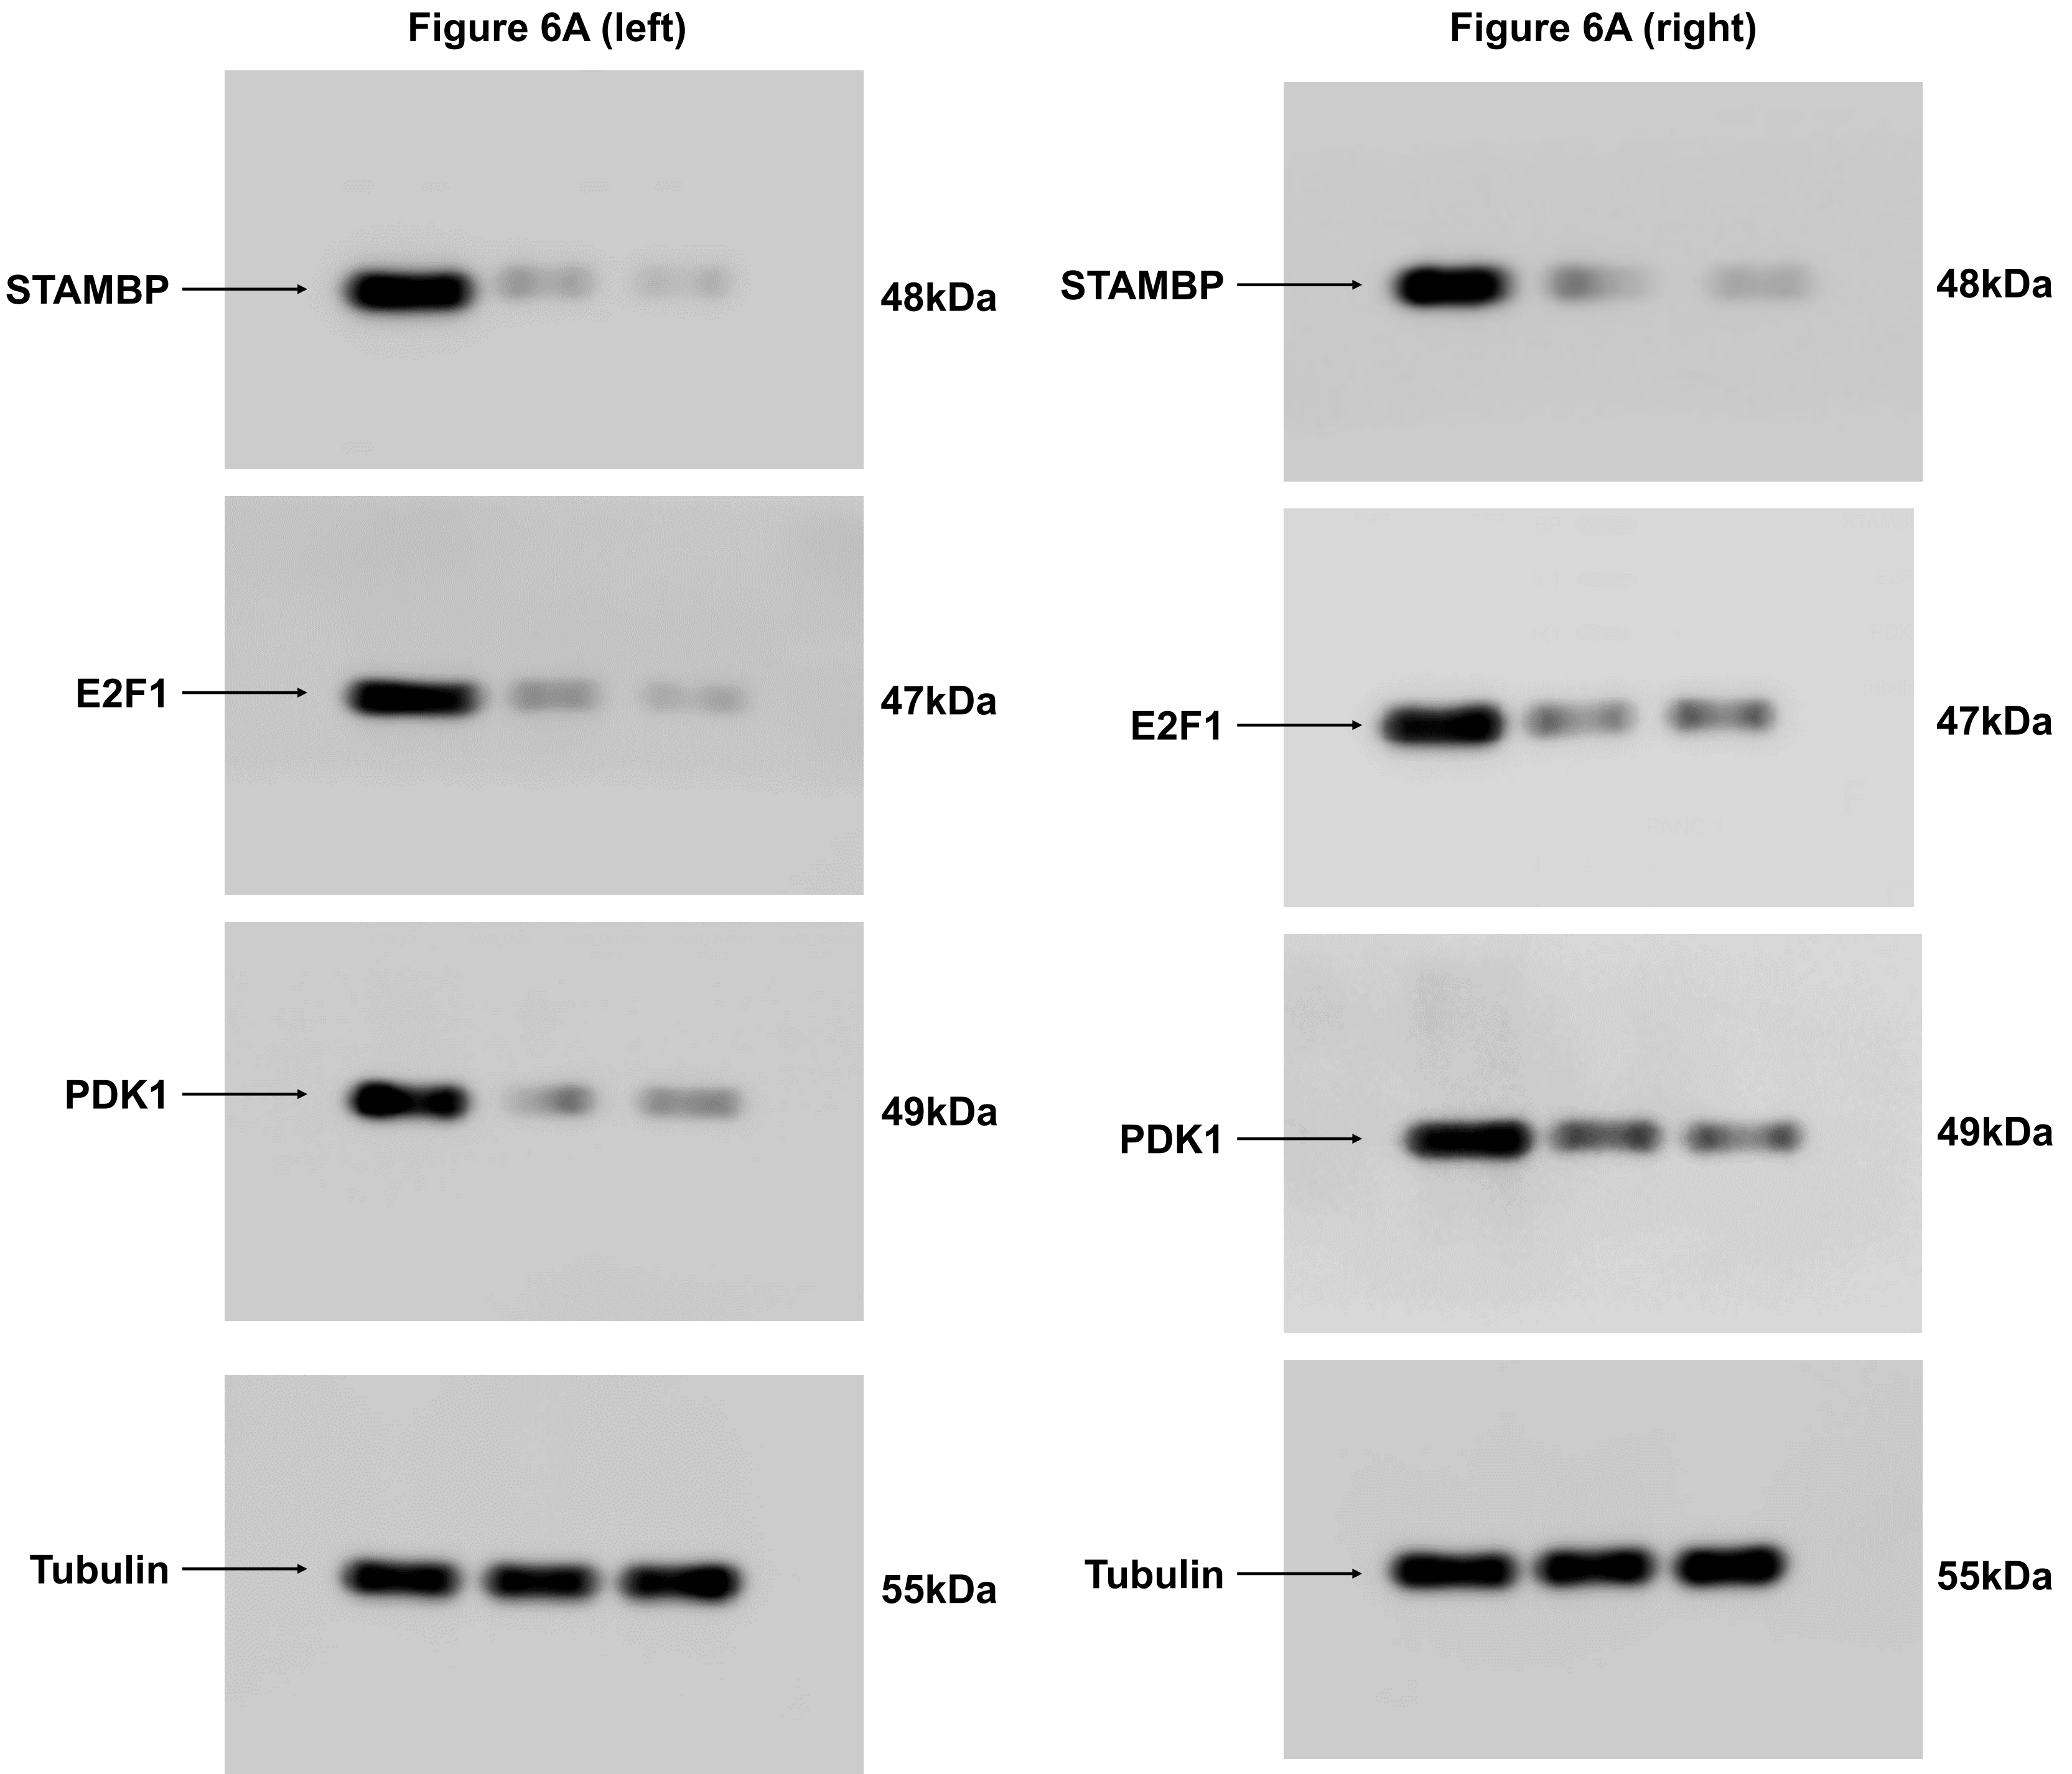



Full and uncropped western blot for Figure 6

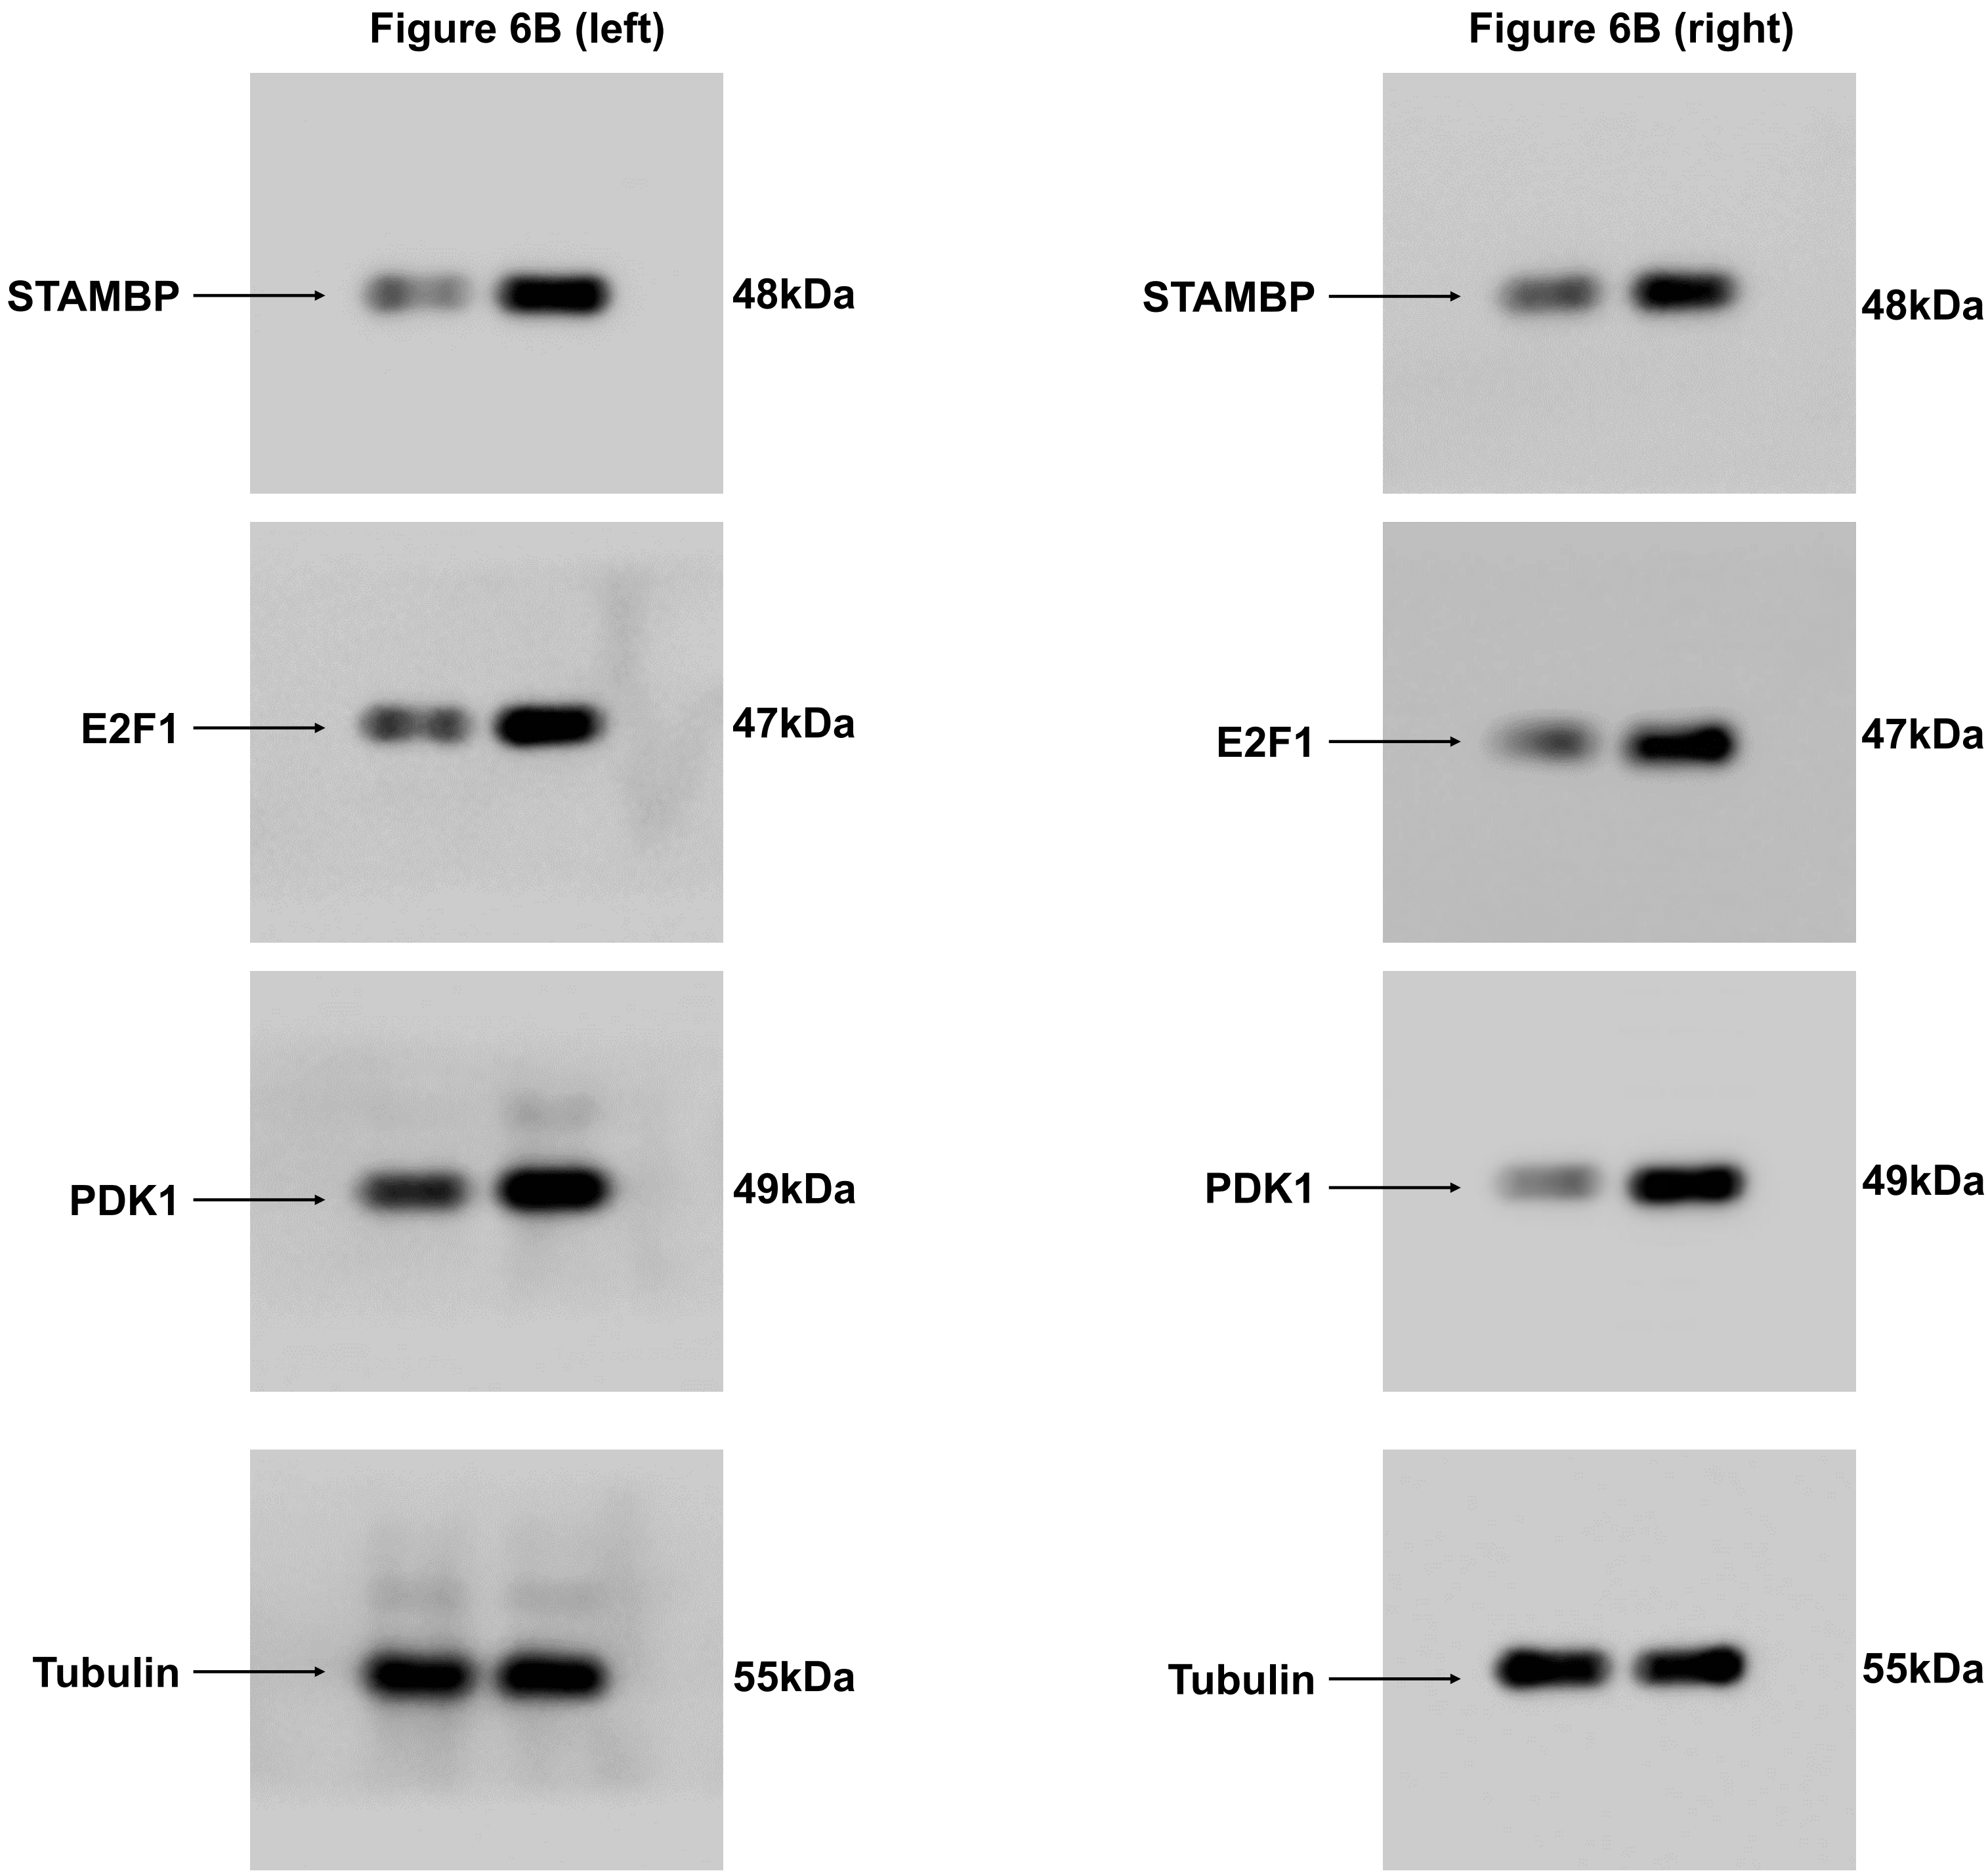



Full and uncropped western blot for Figure 6

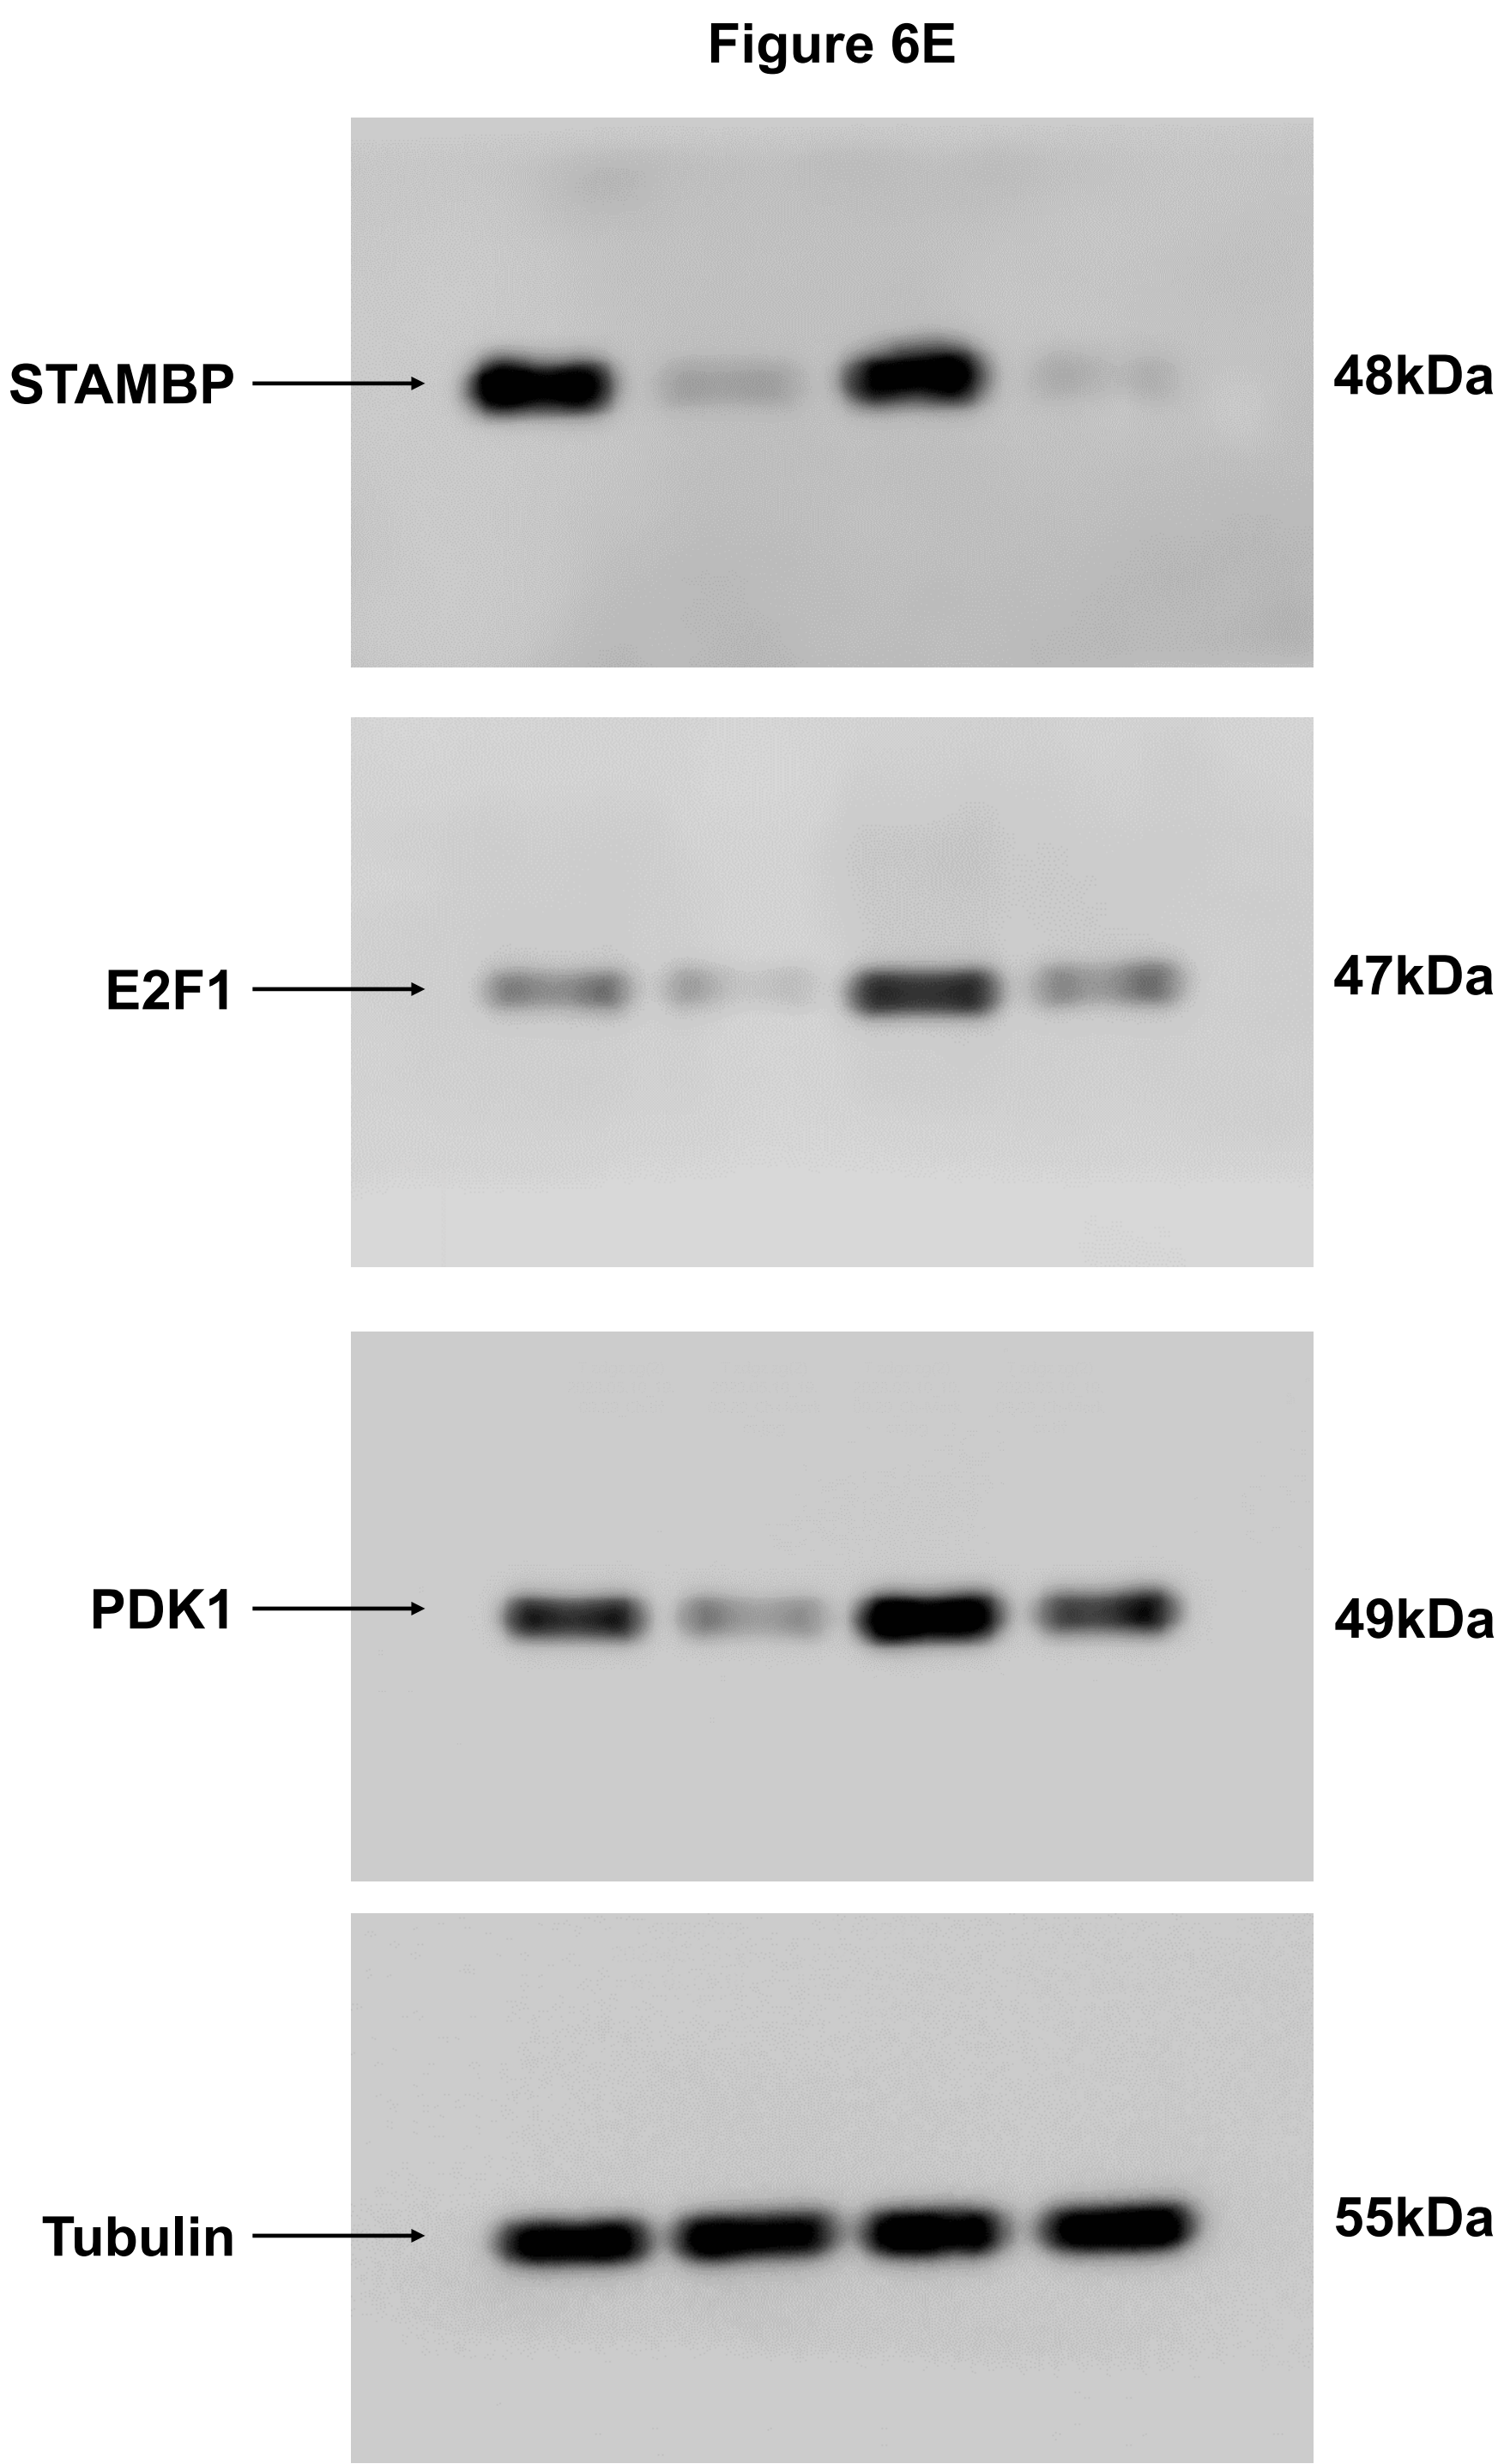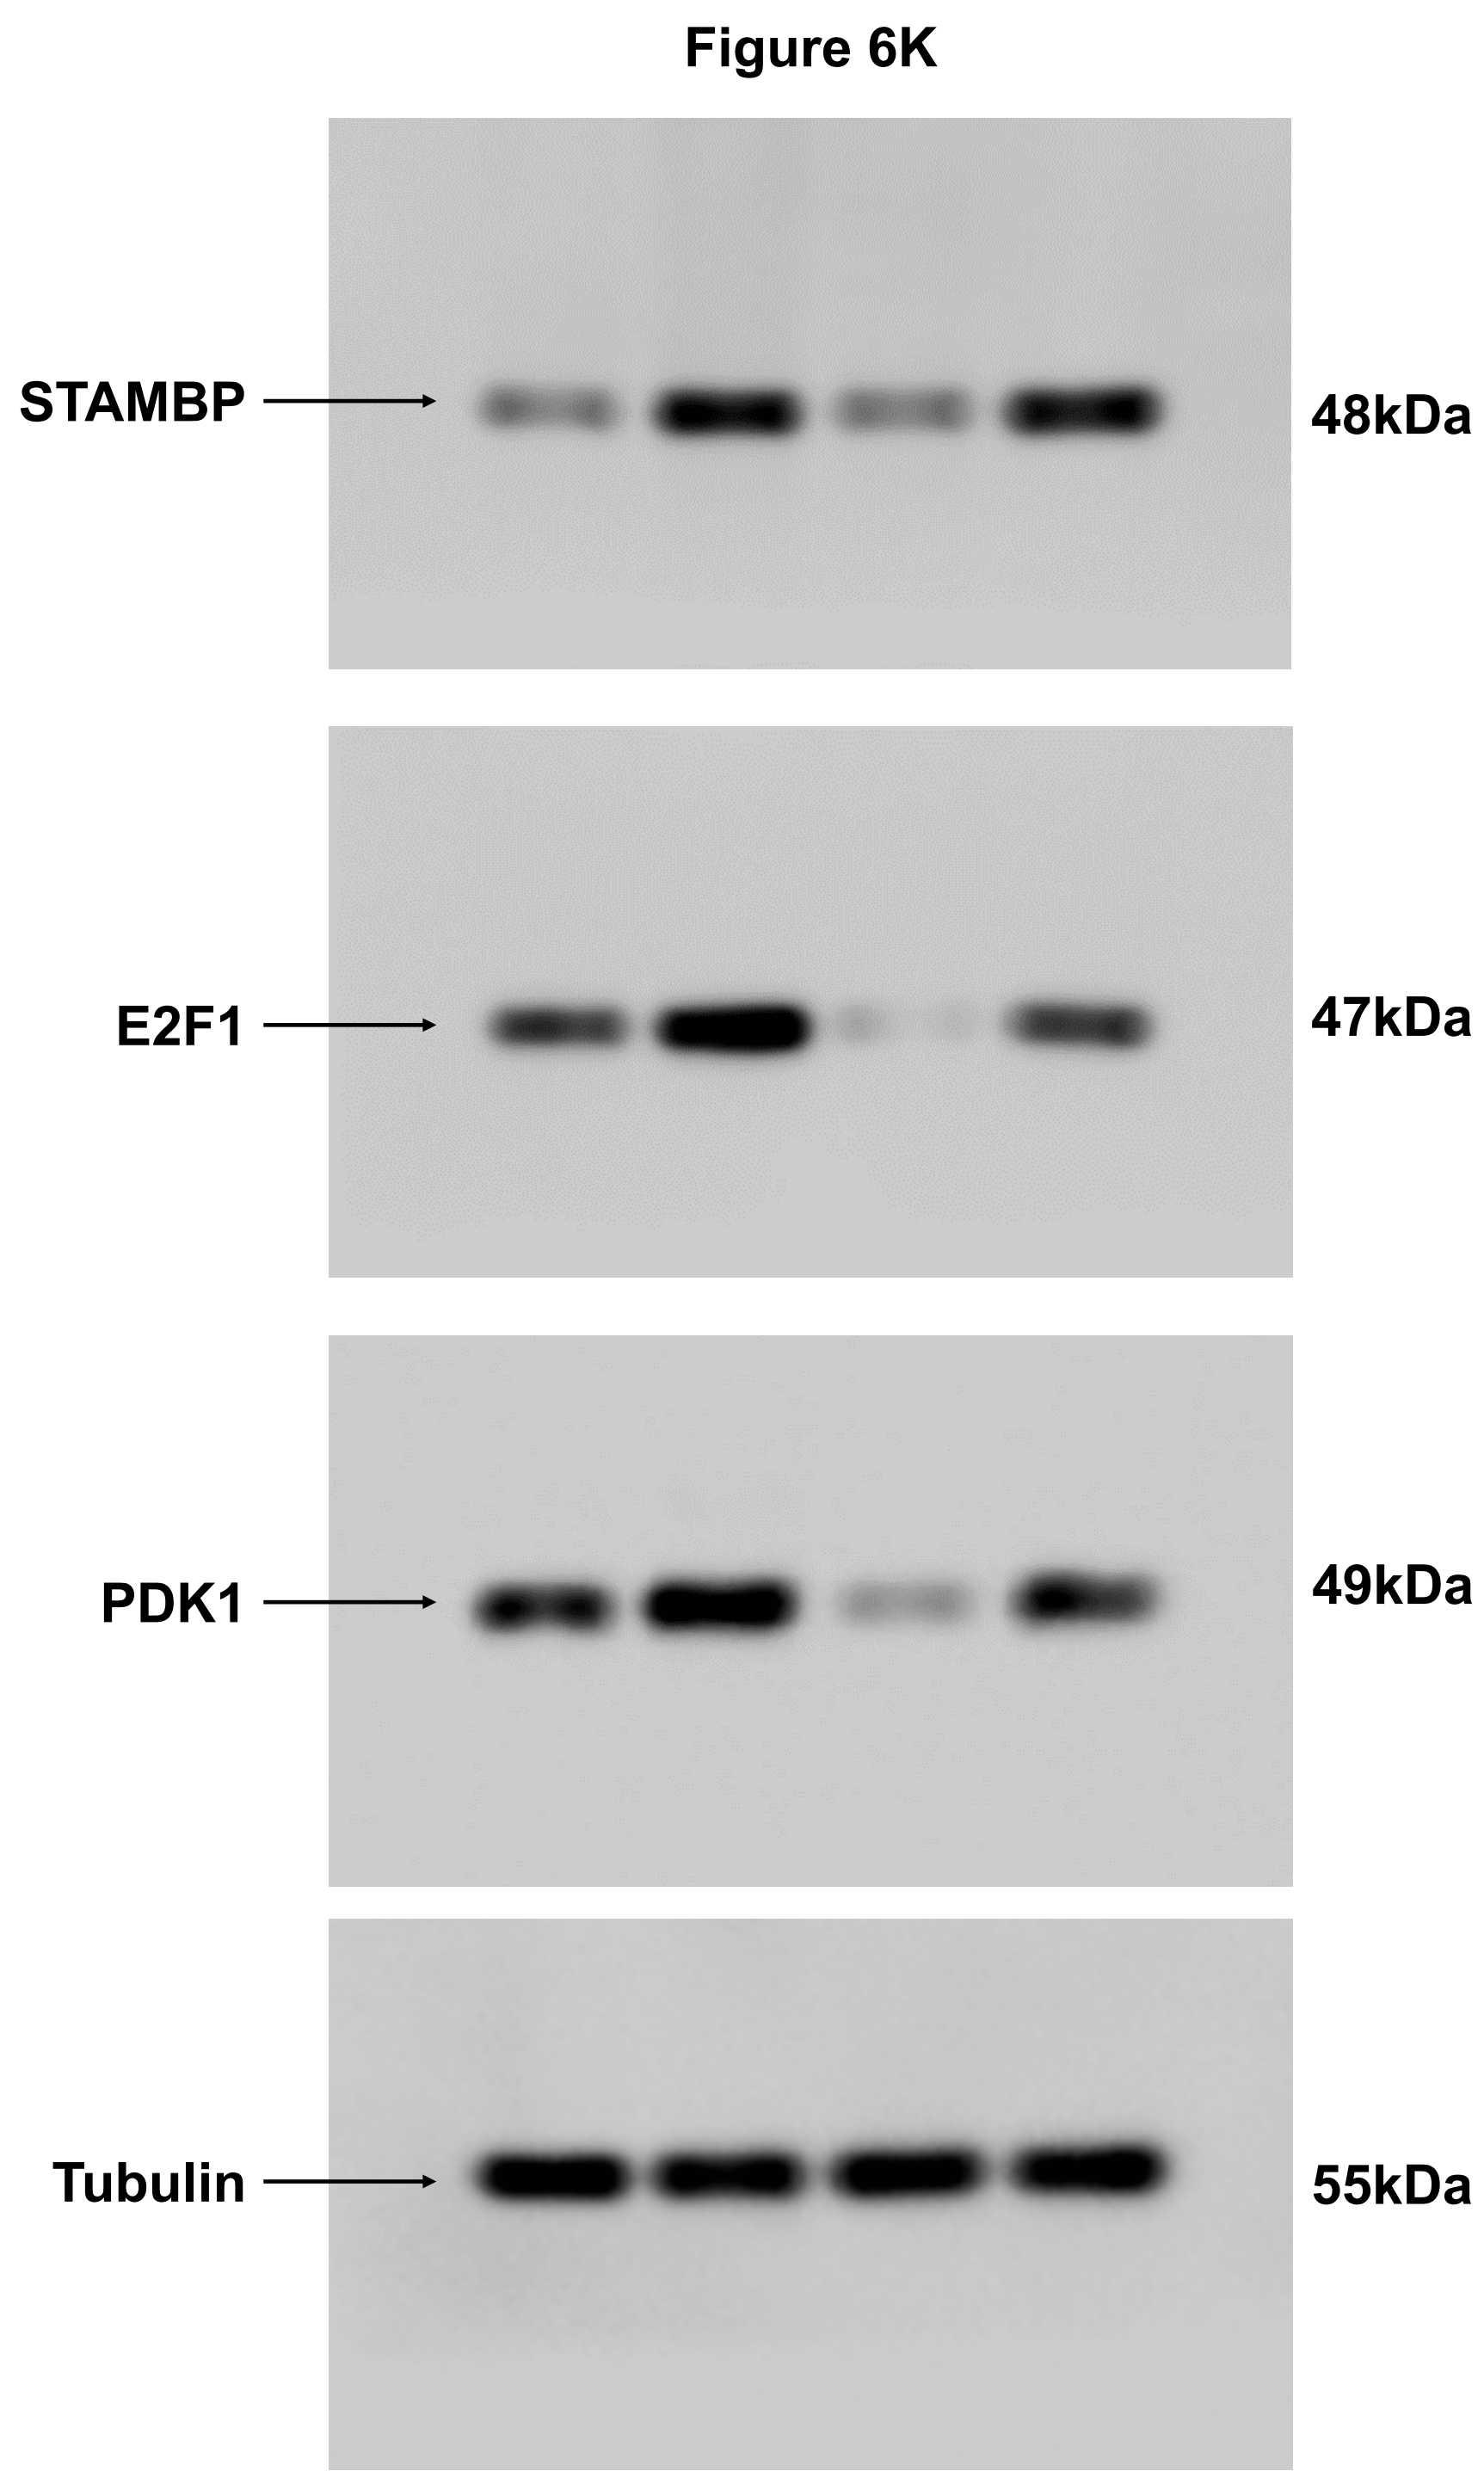



Full and uncropped western blot for Figure 7

Figure 7A (left)

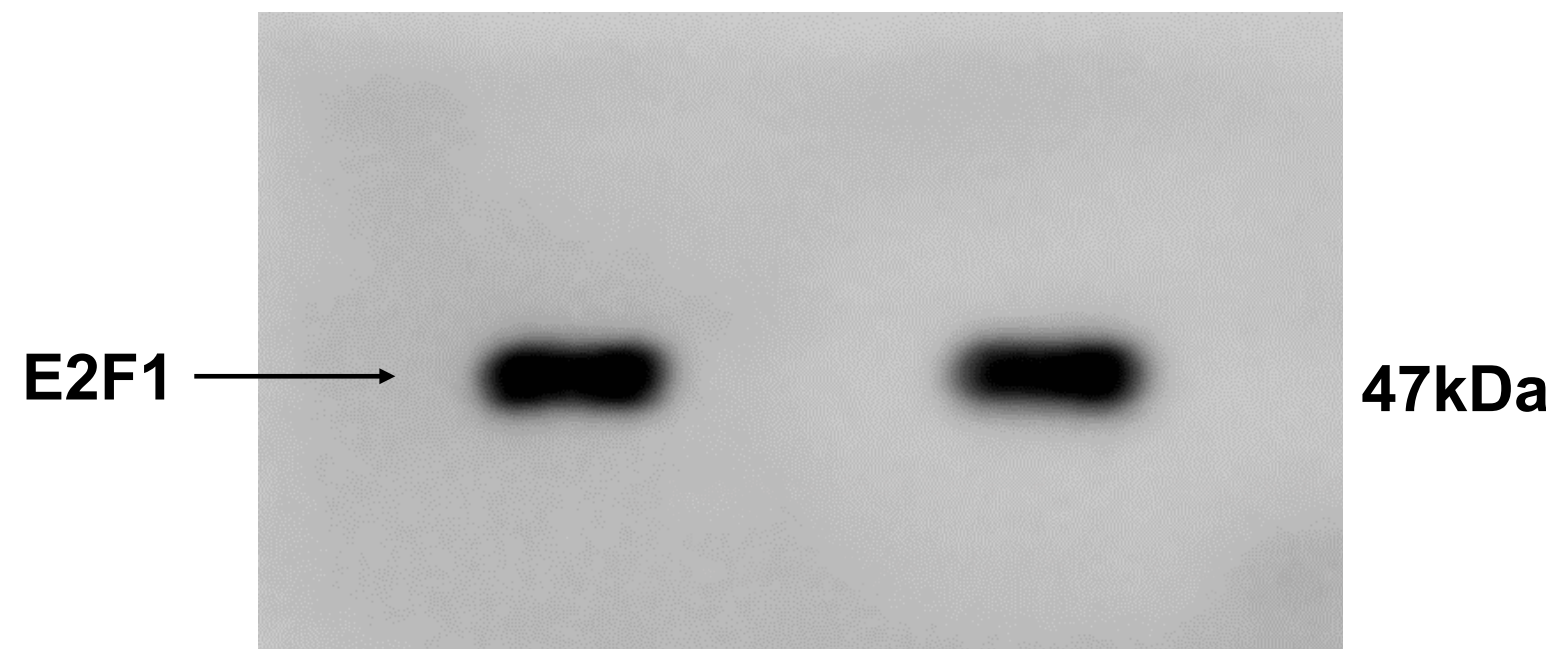

Figure 7A (right)

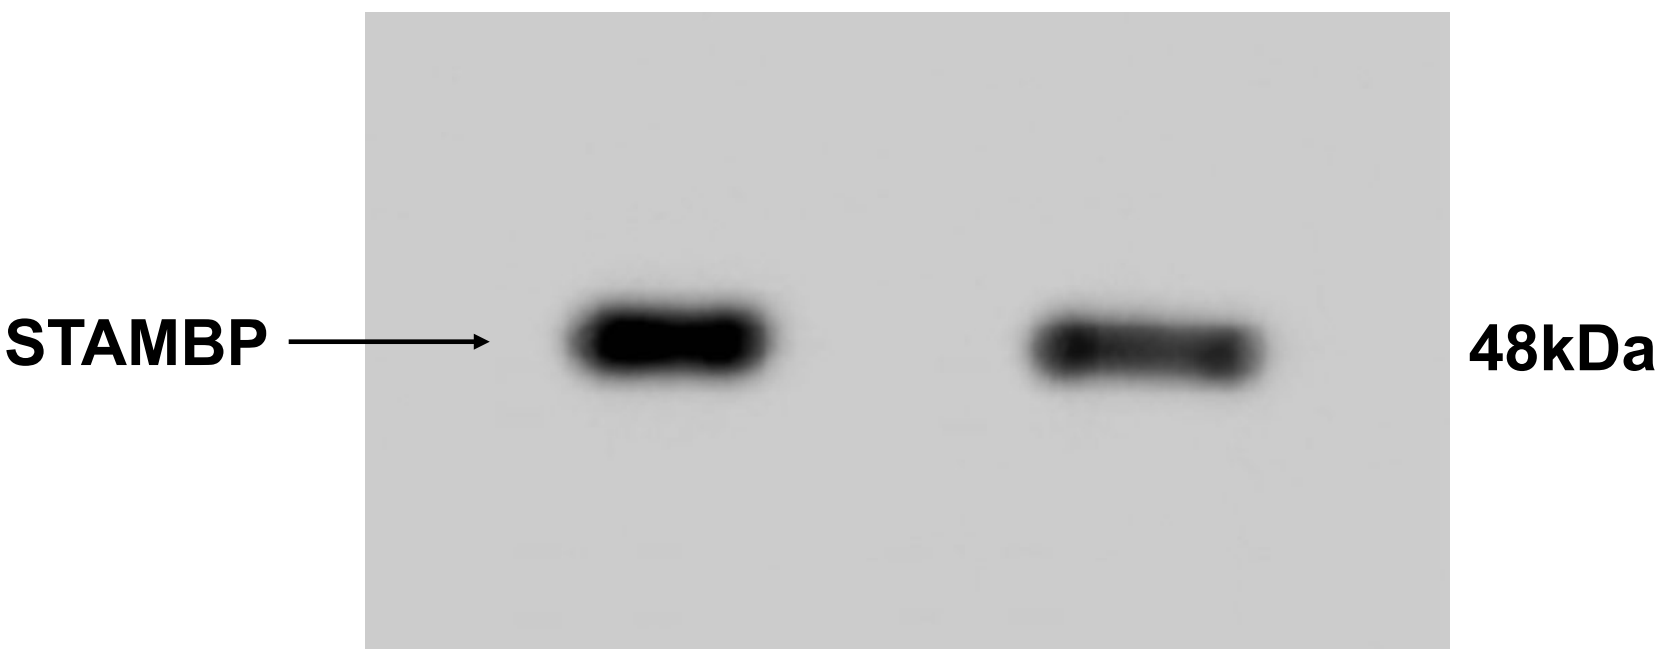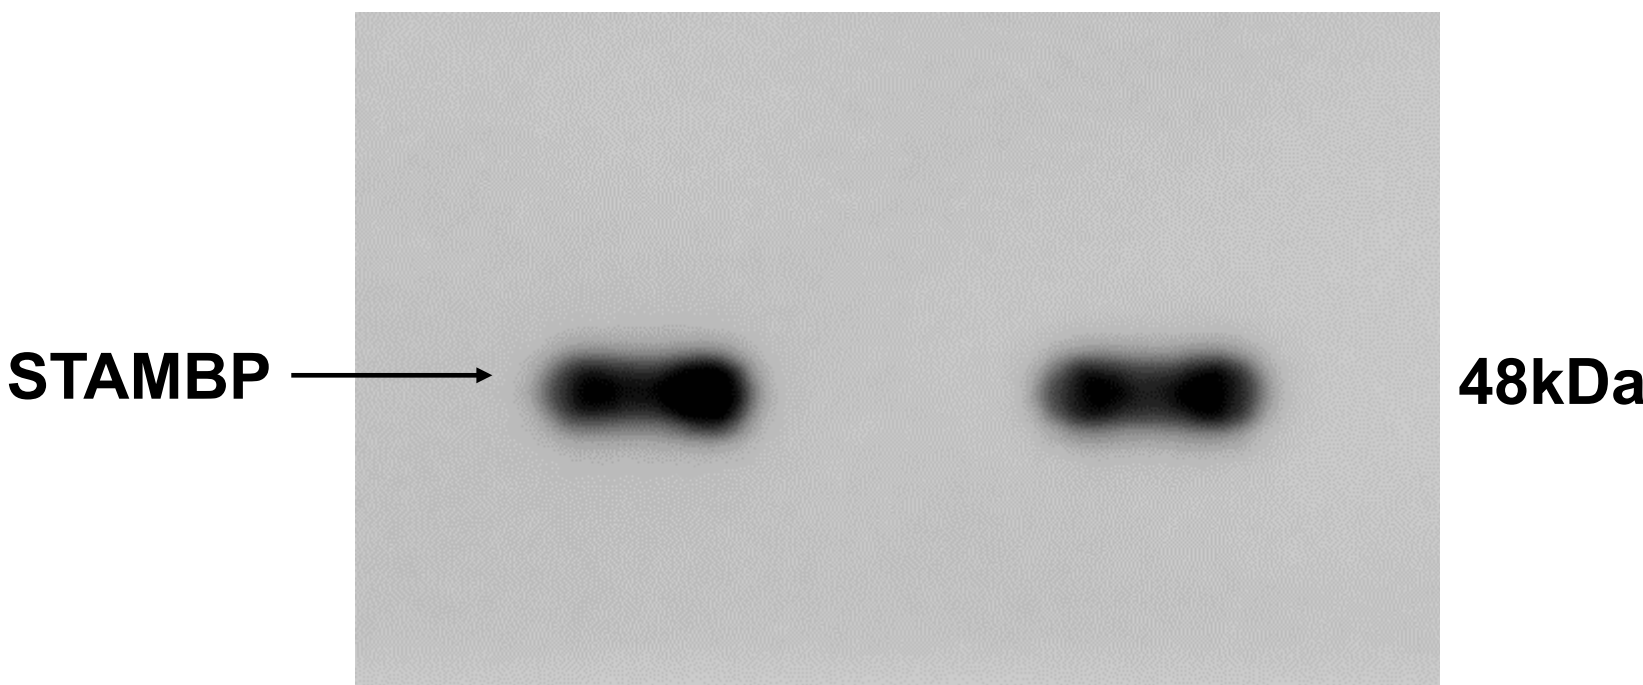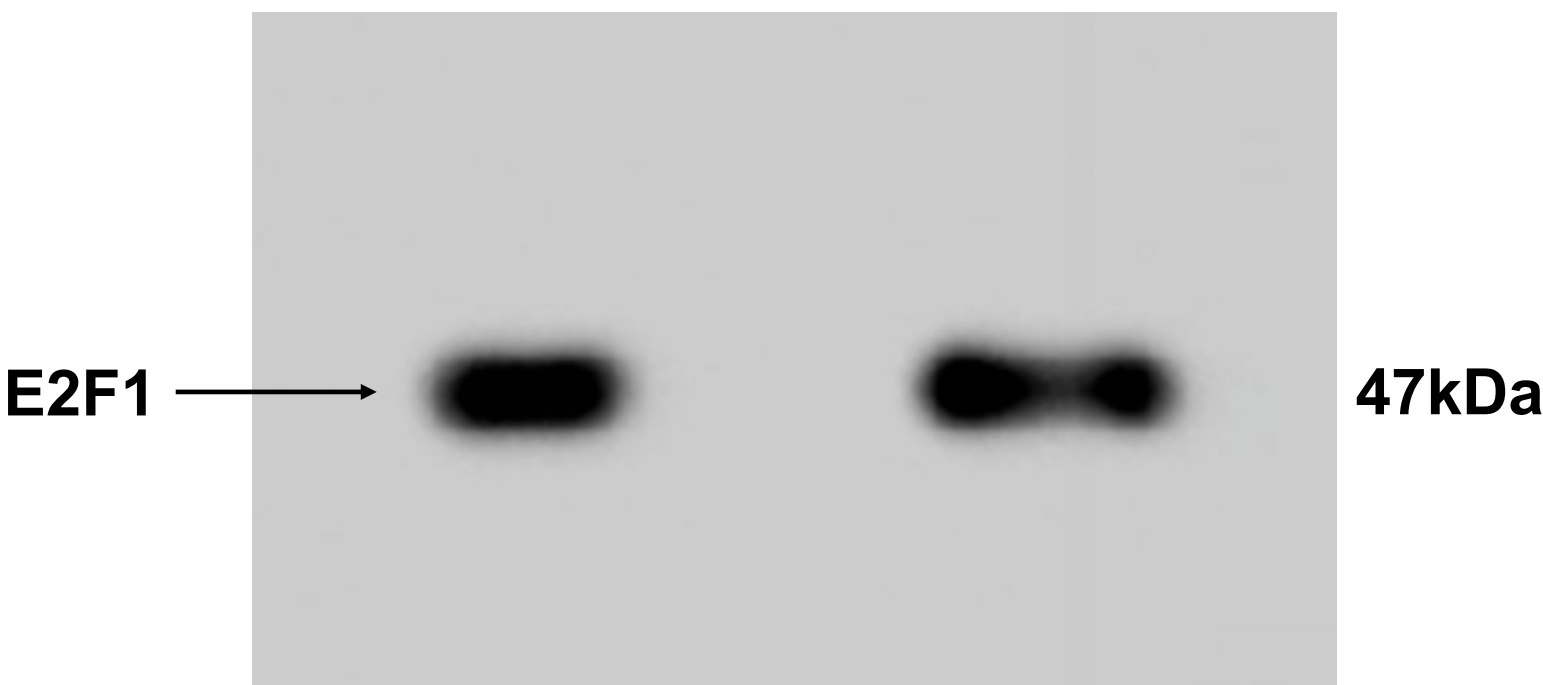

Figure 7B (left)

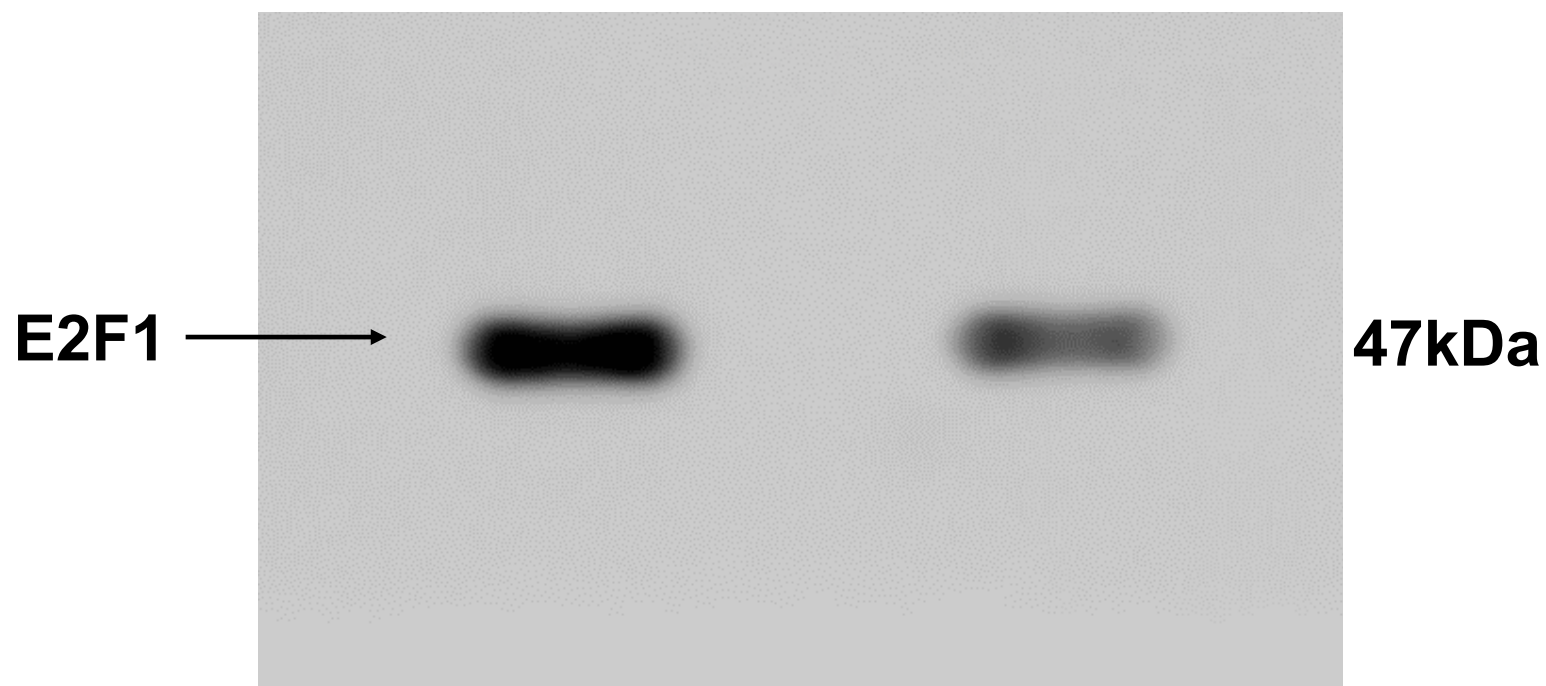

Figure 7A (right)

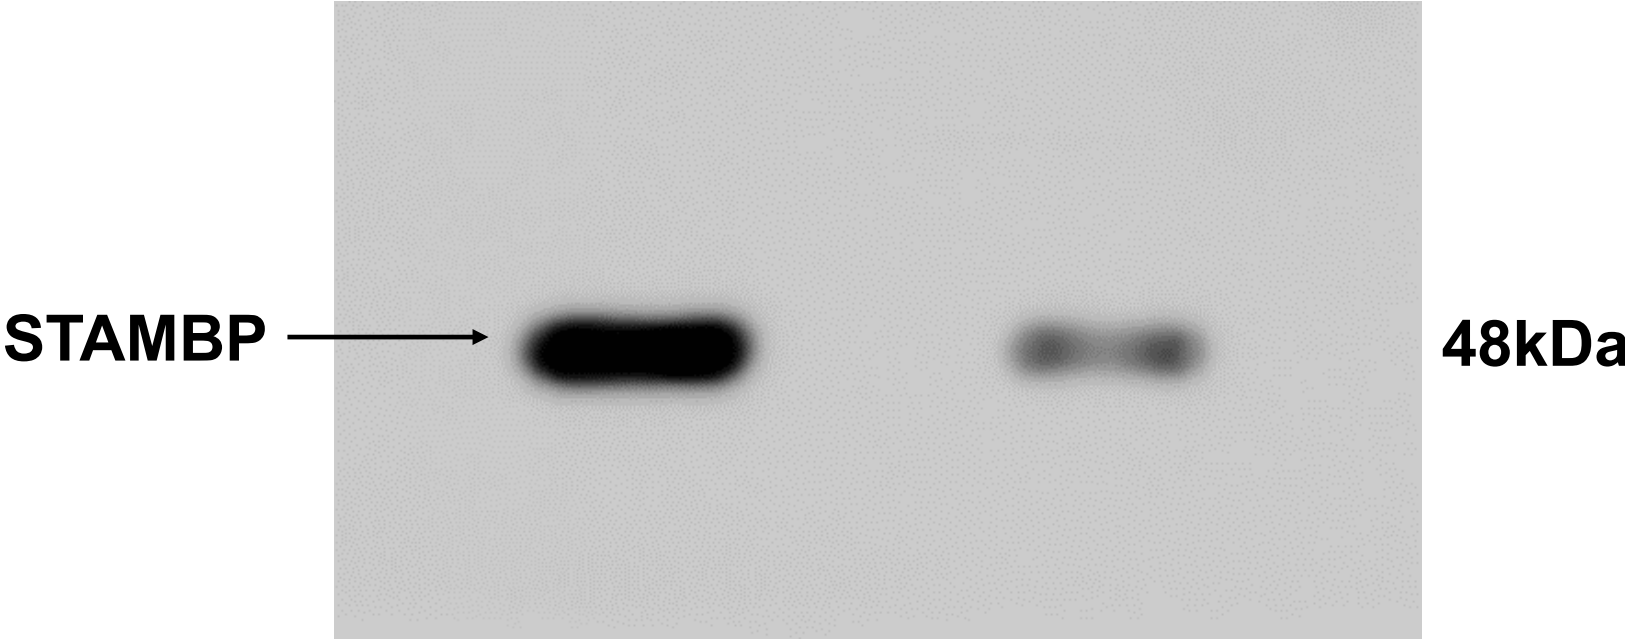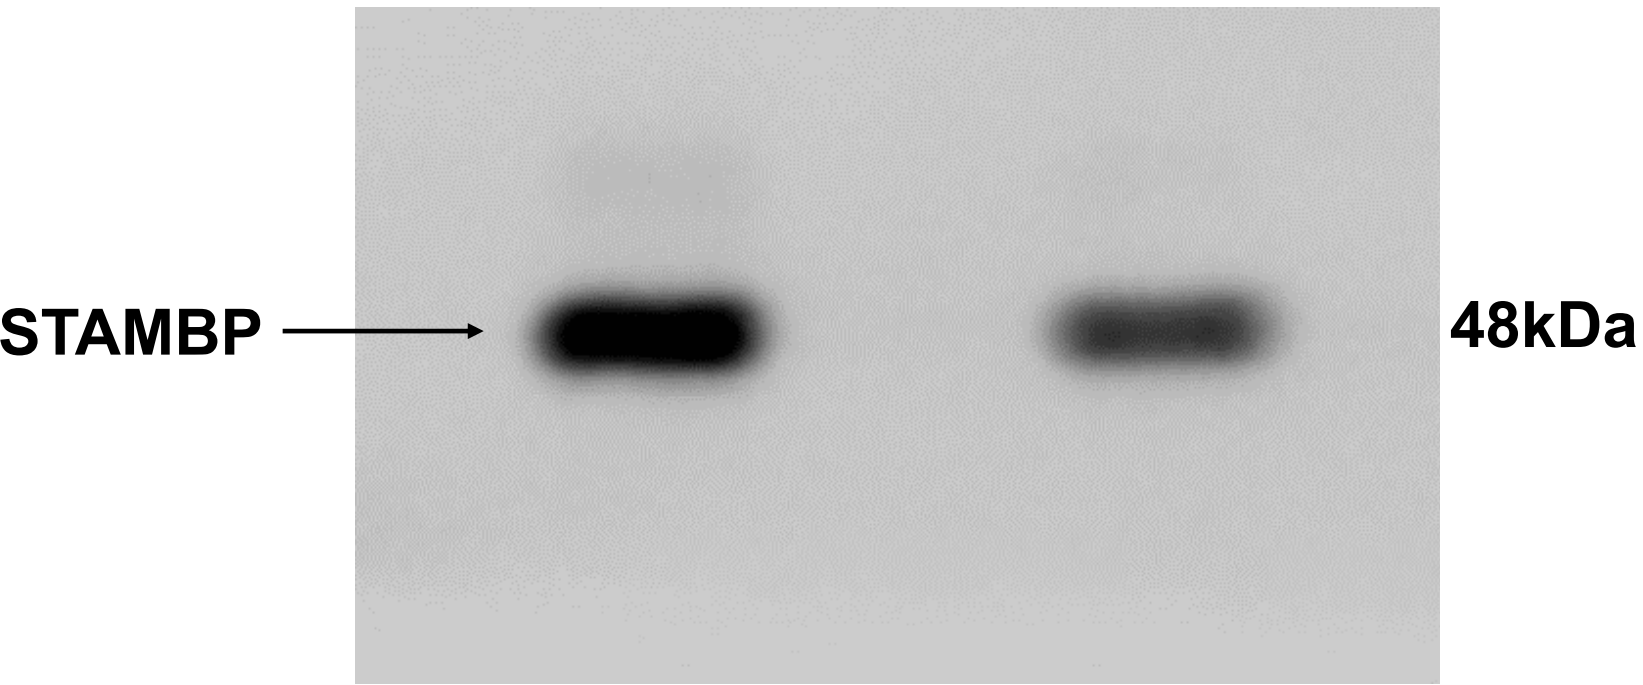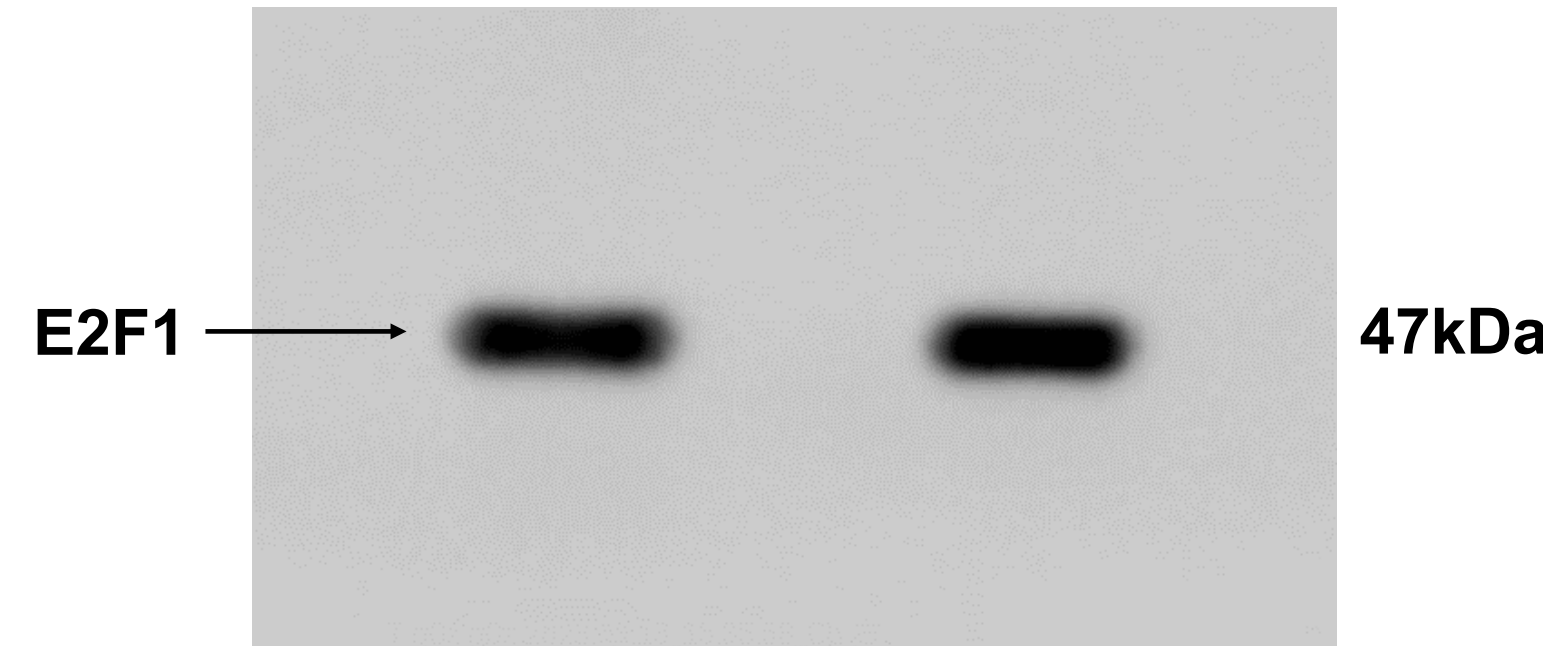



Full and uncropped western blot for Figure 7

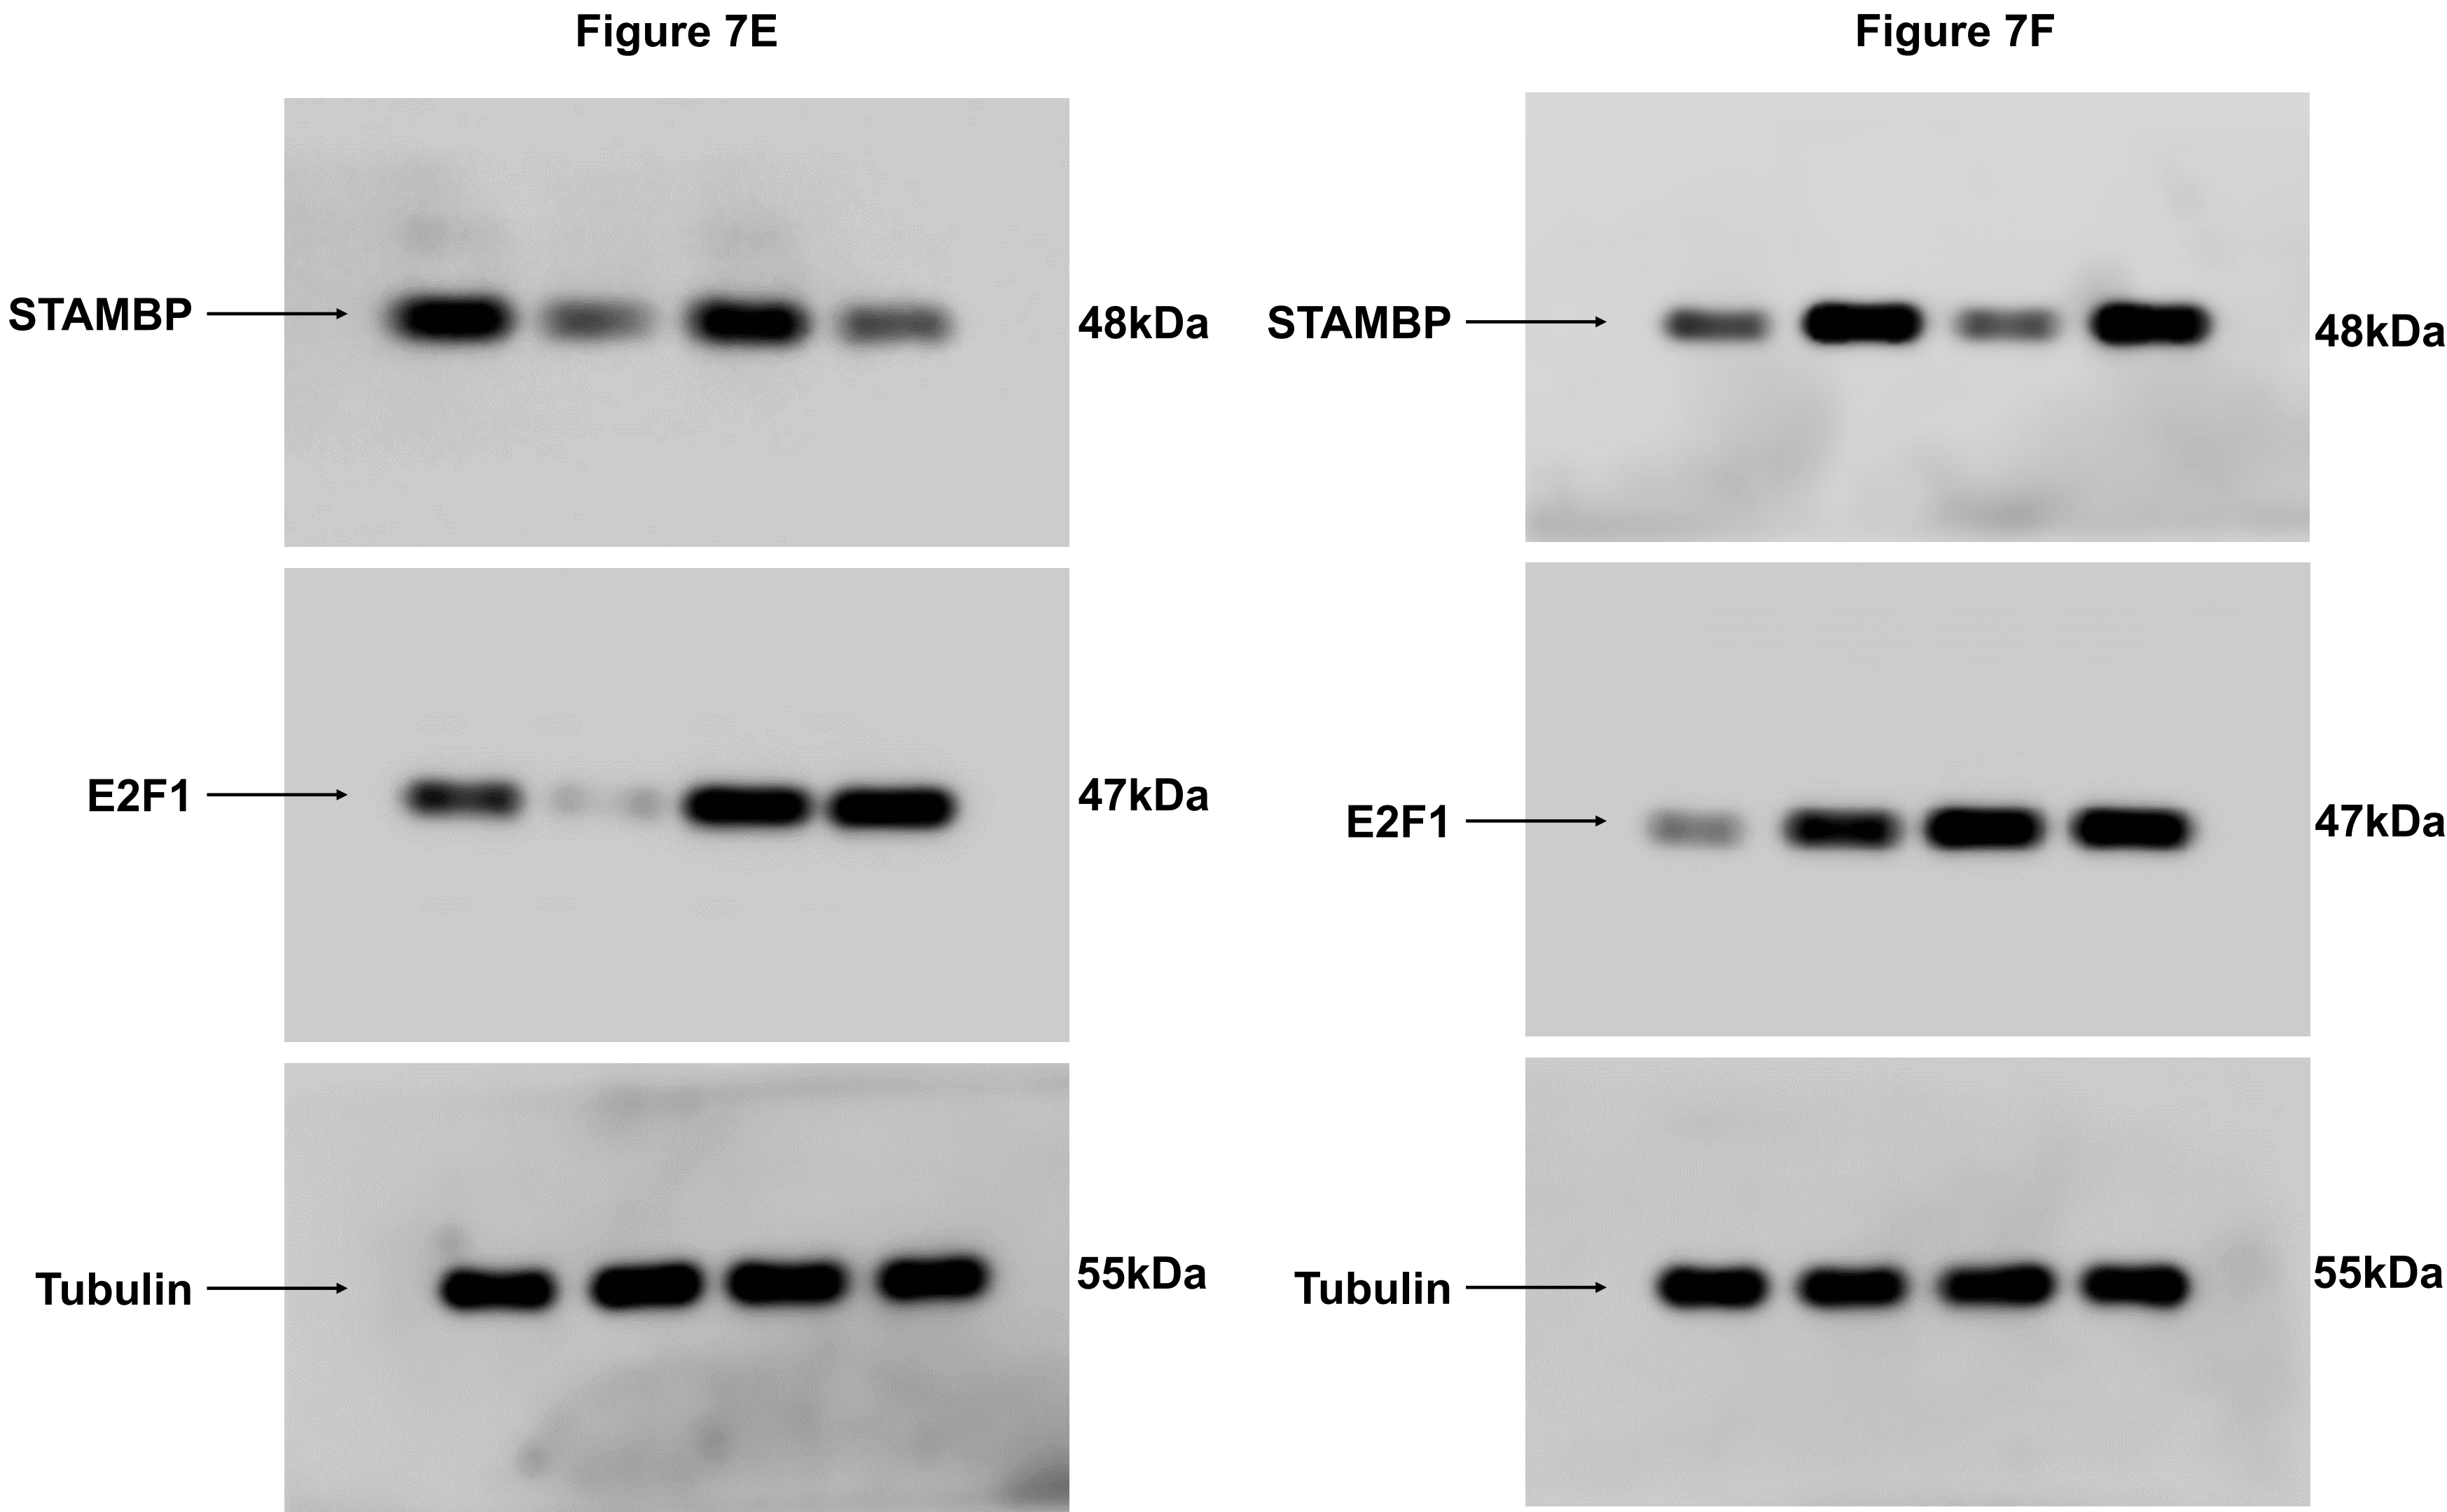



Full and uncropped western blot for Figure 7

Figure 7G

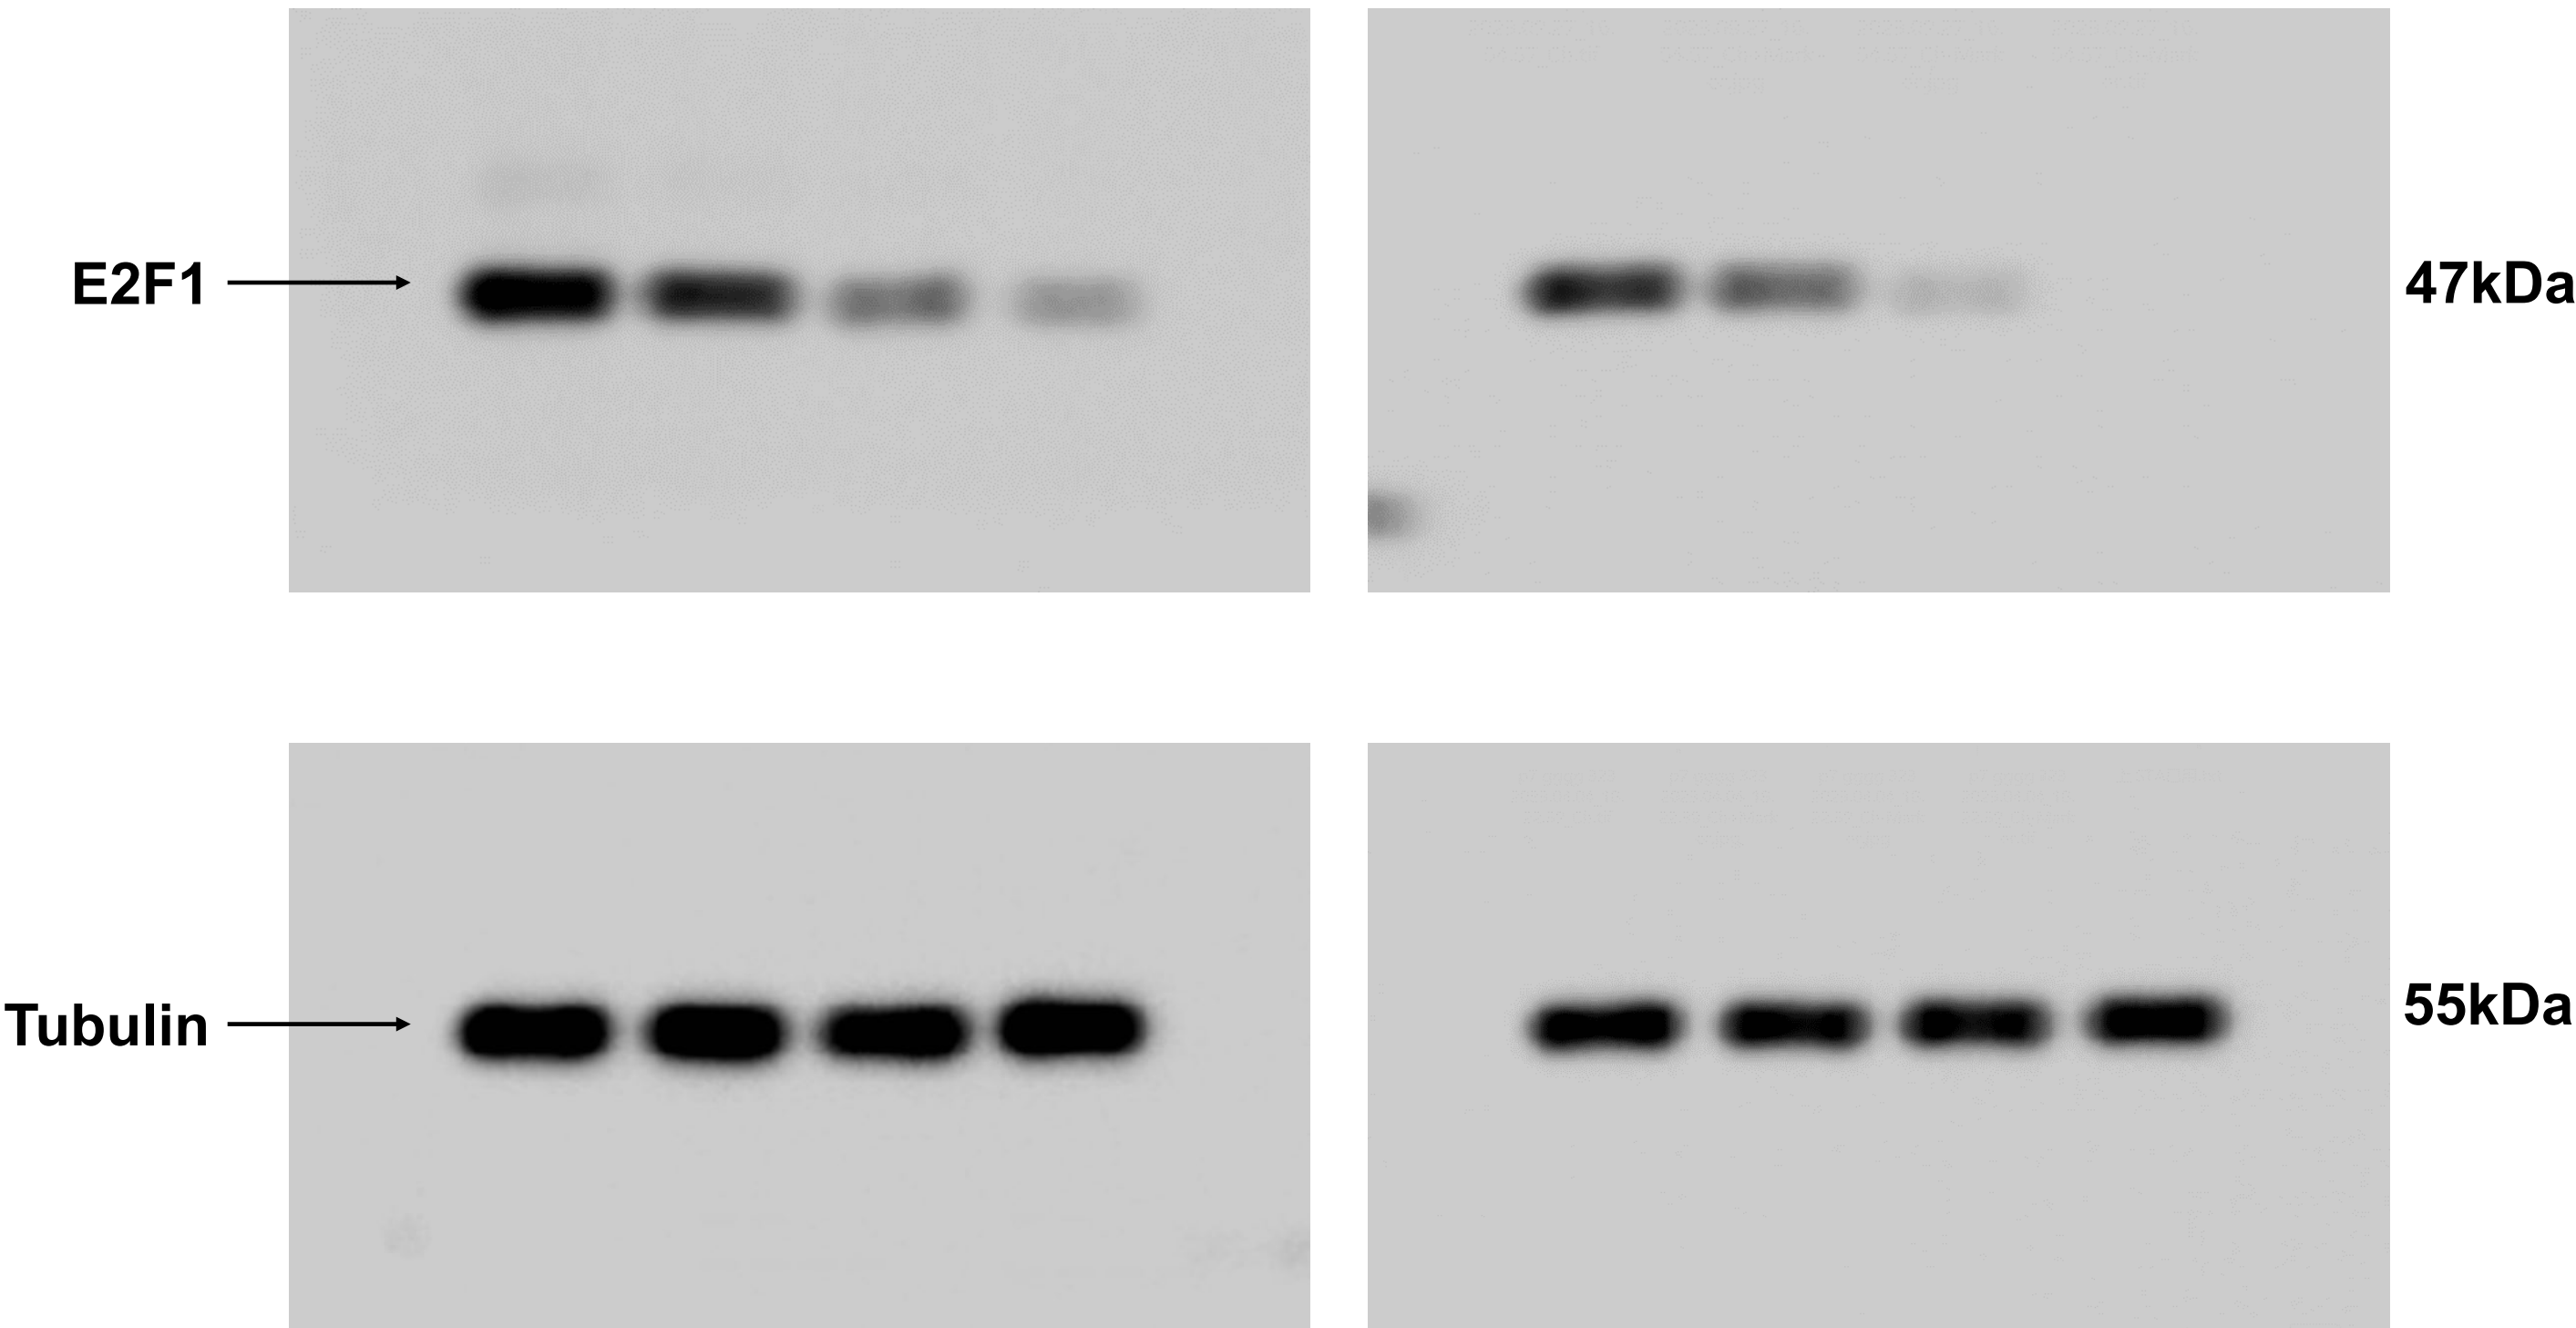

Figure 7I (left)

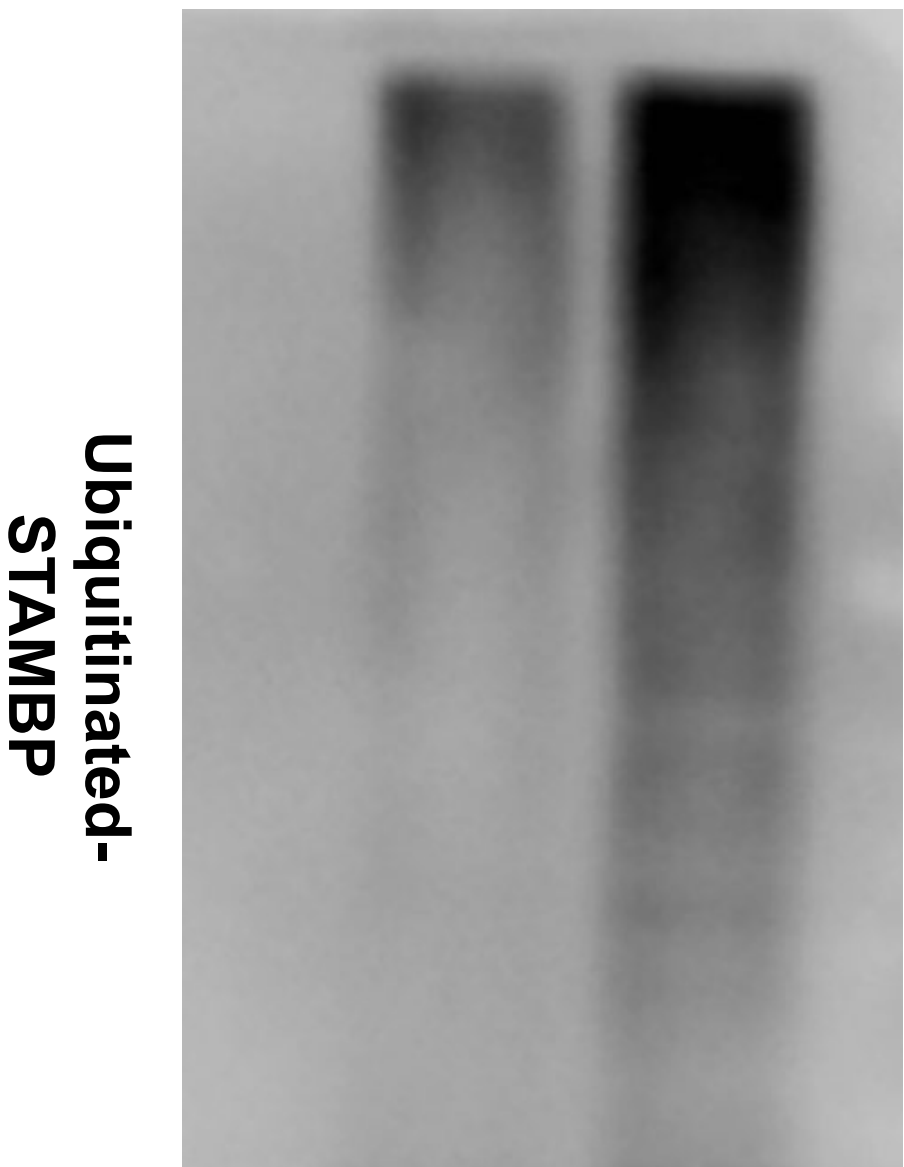

Figure 7H

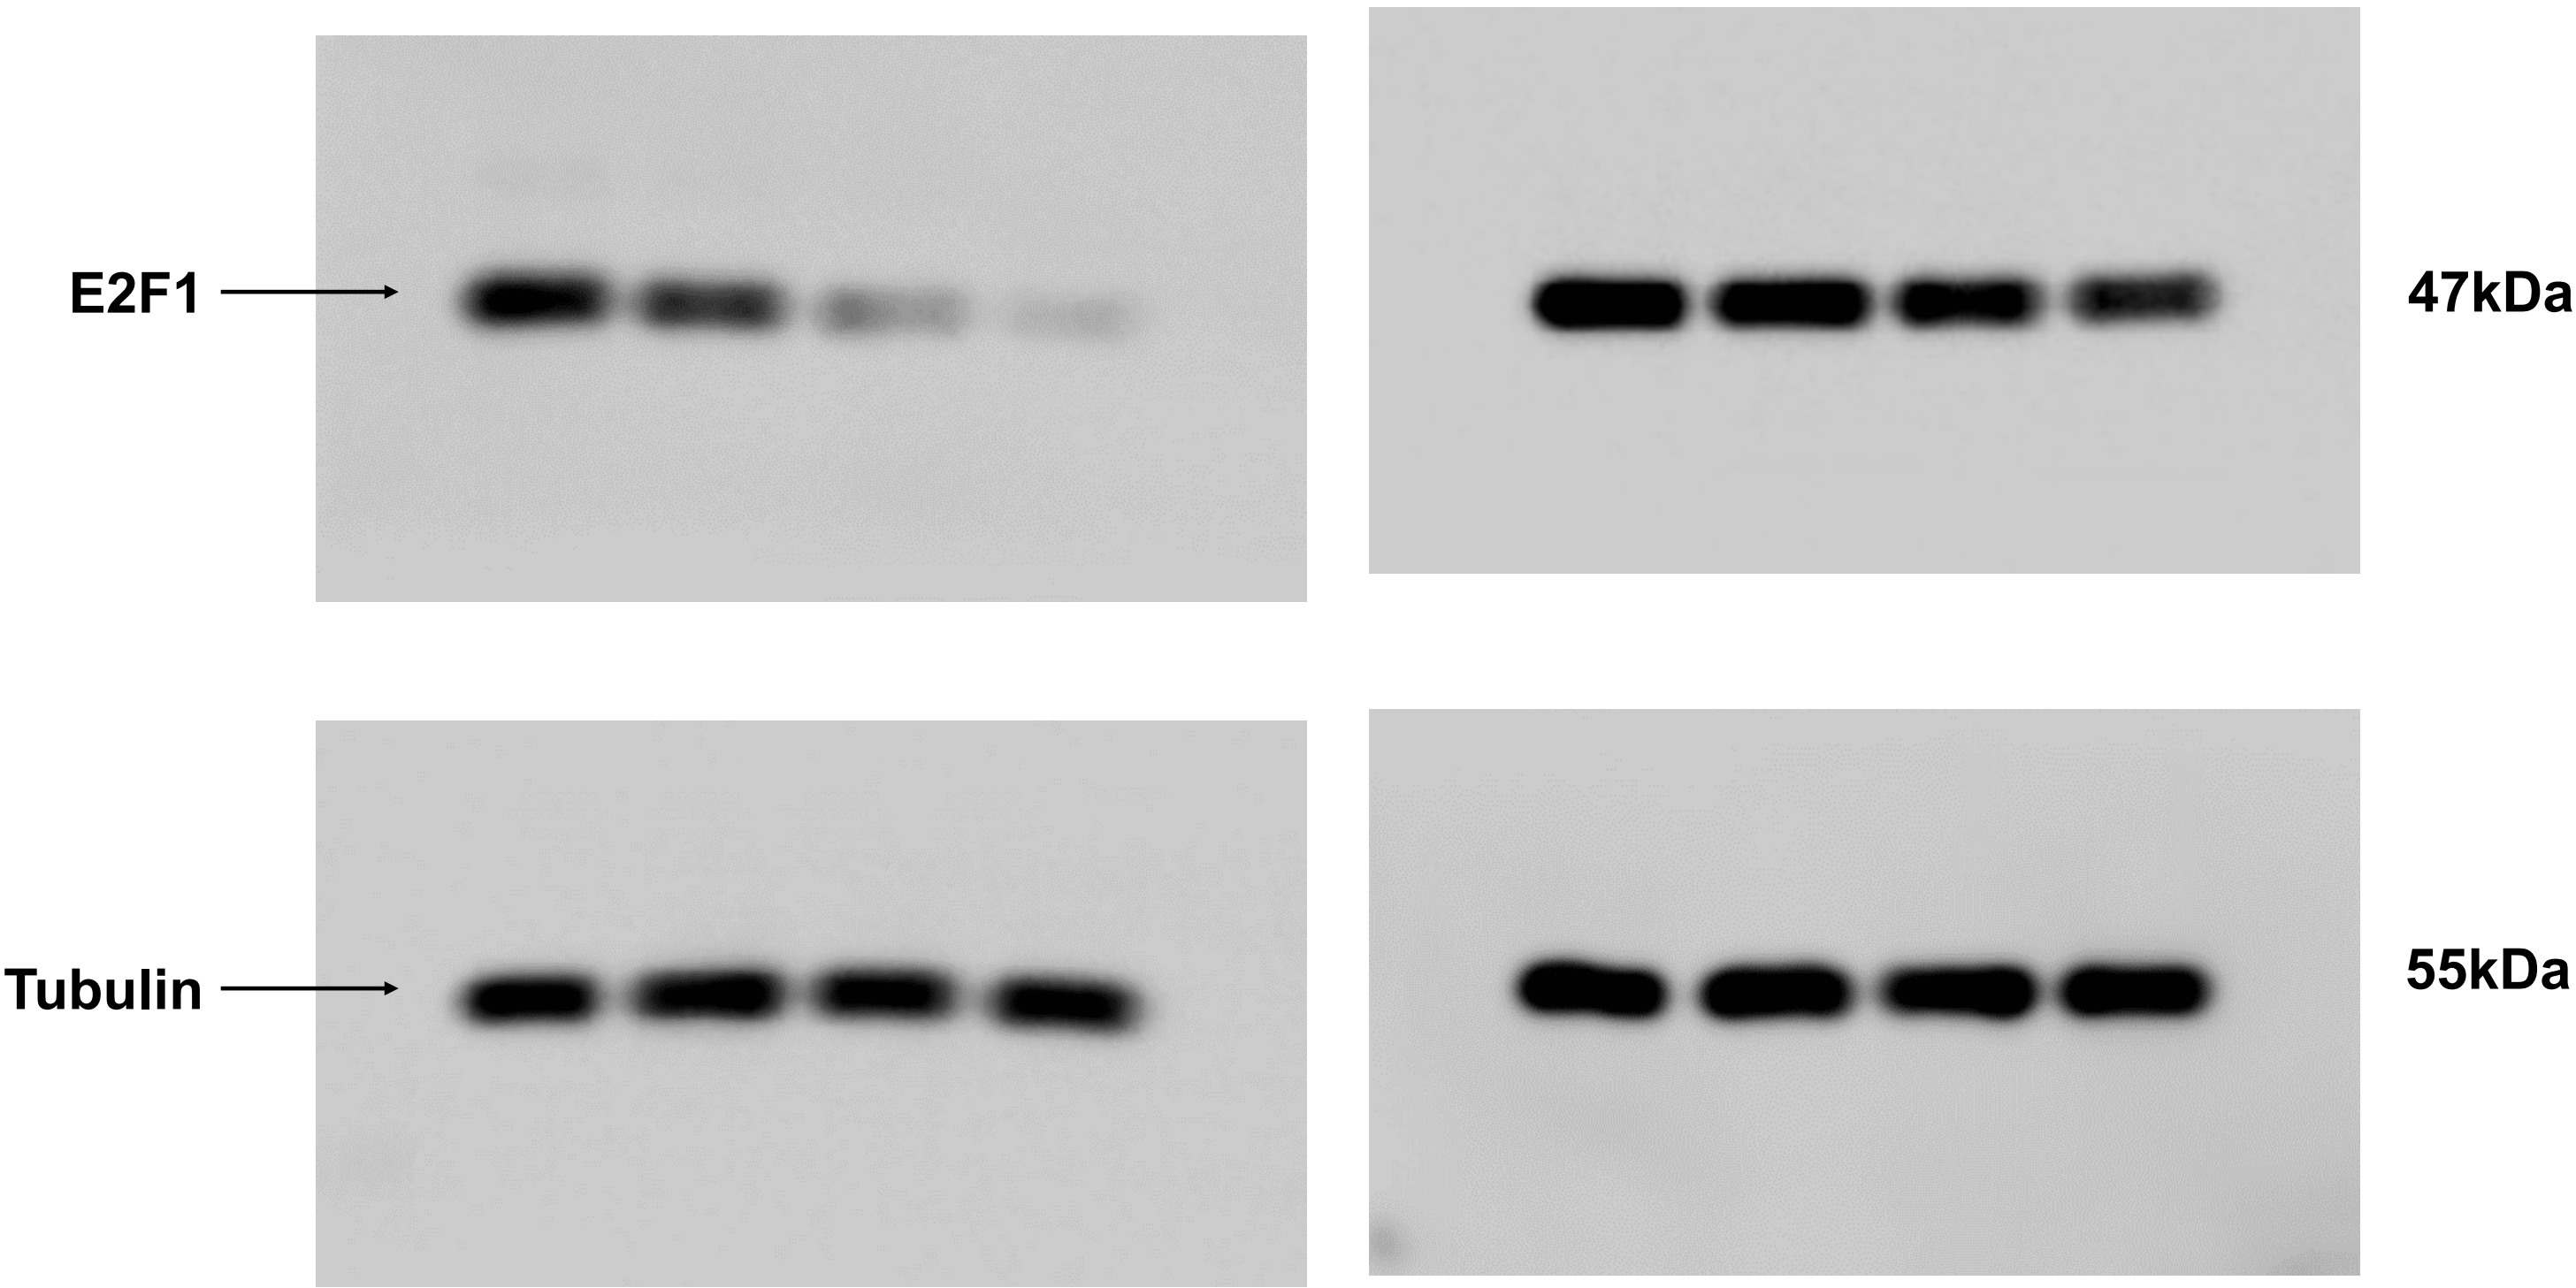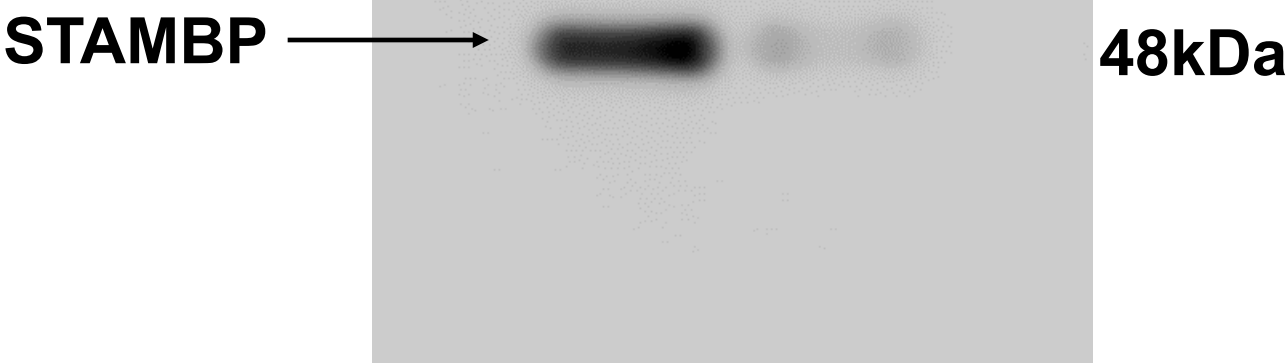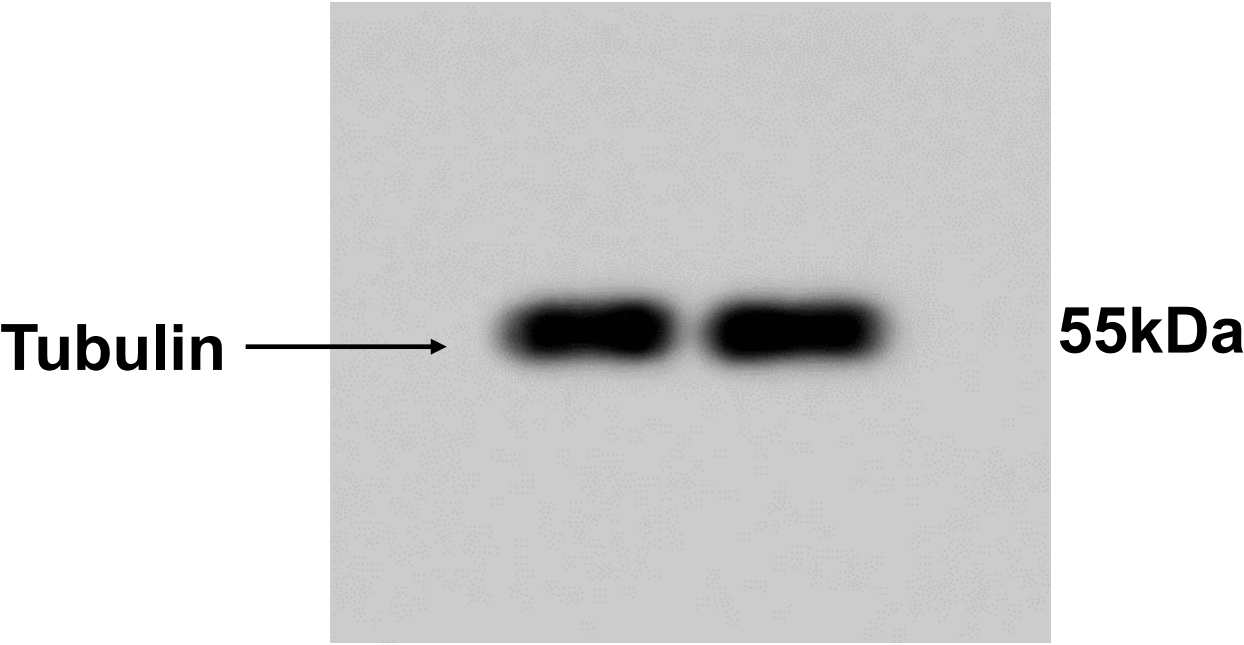



Full and uncropped western blot for Figure 7

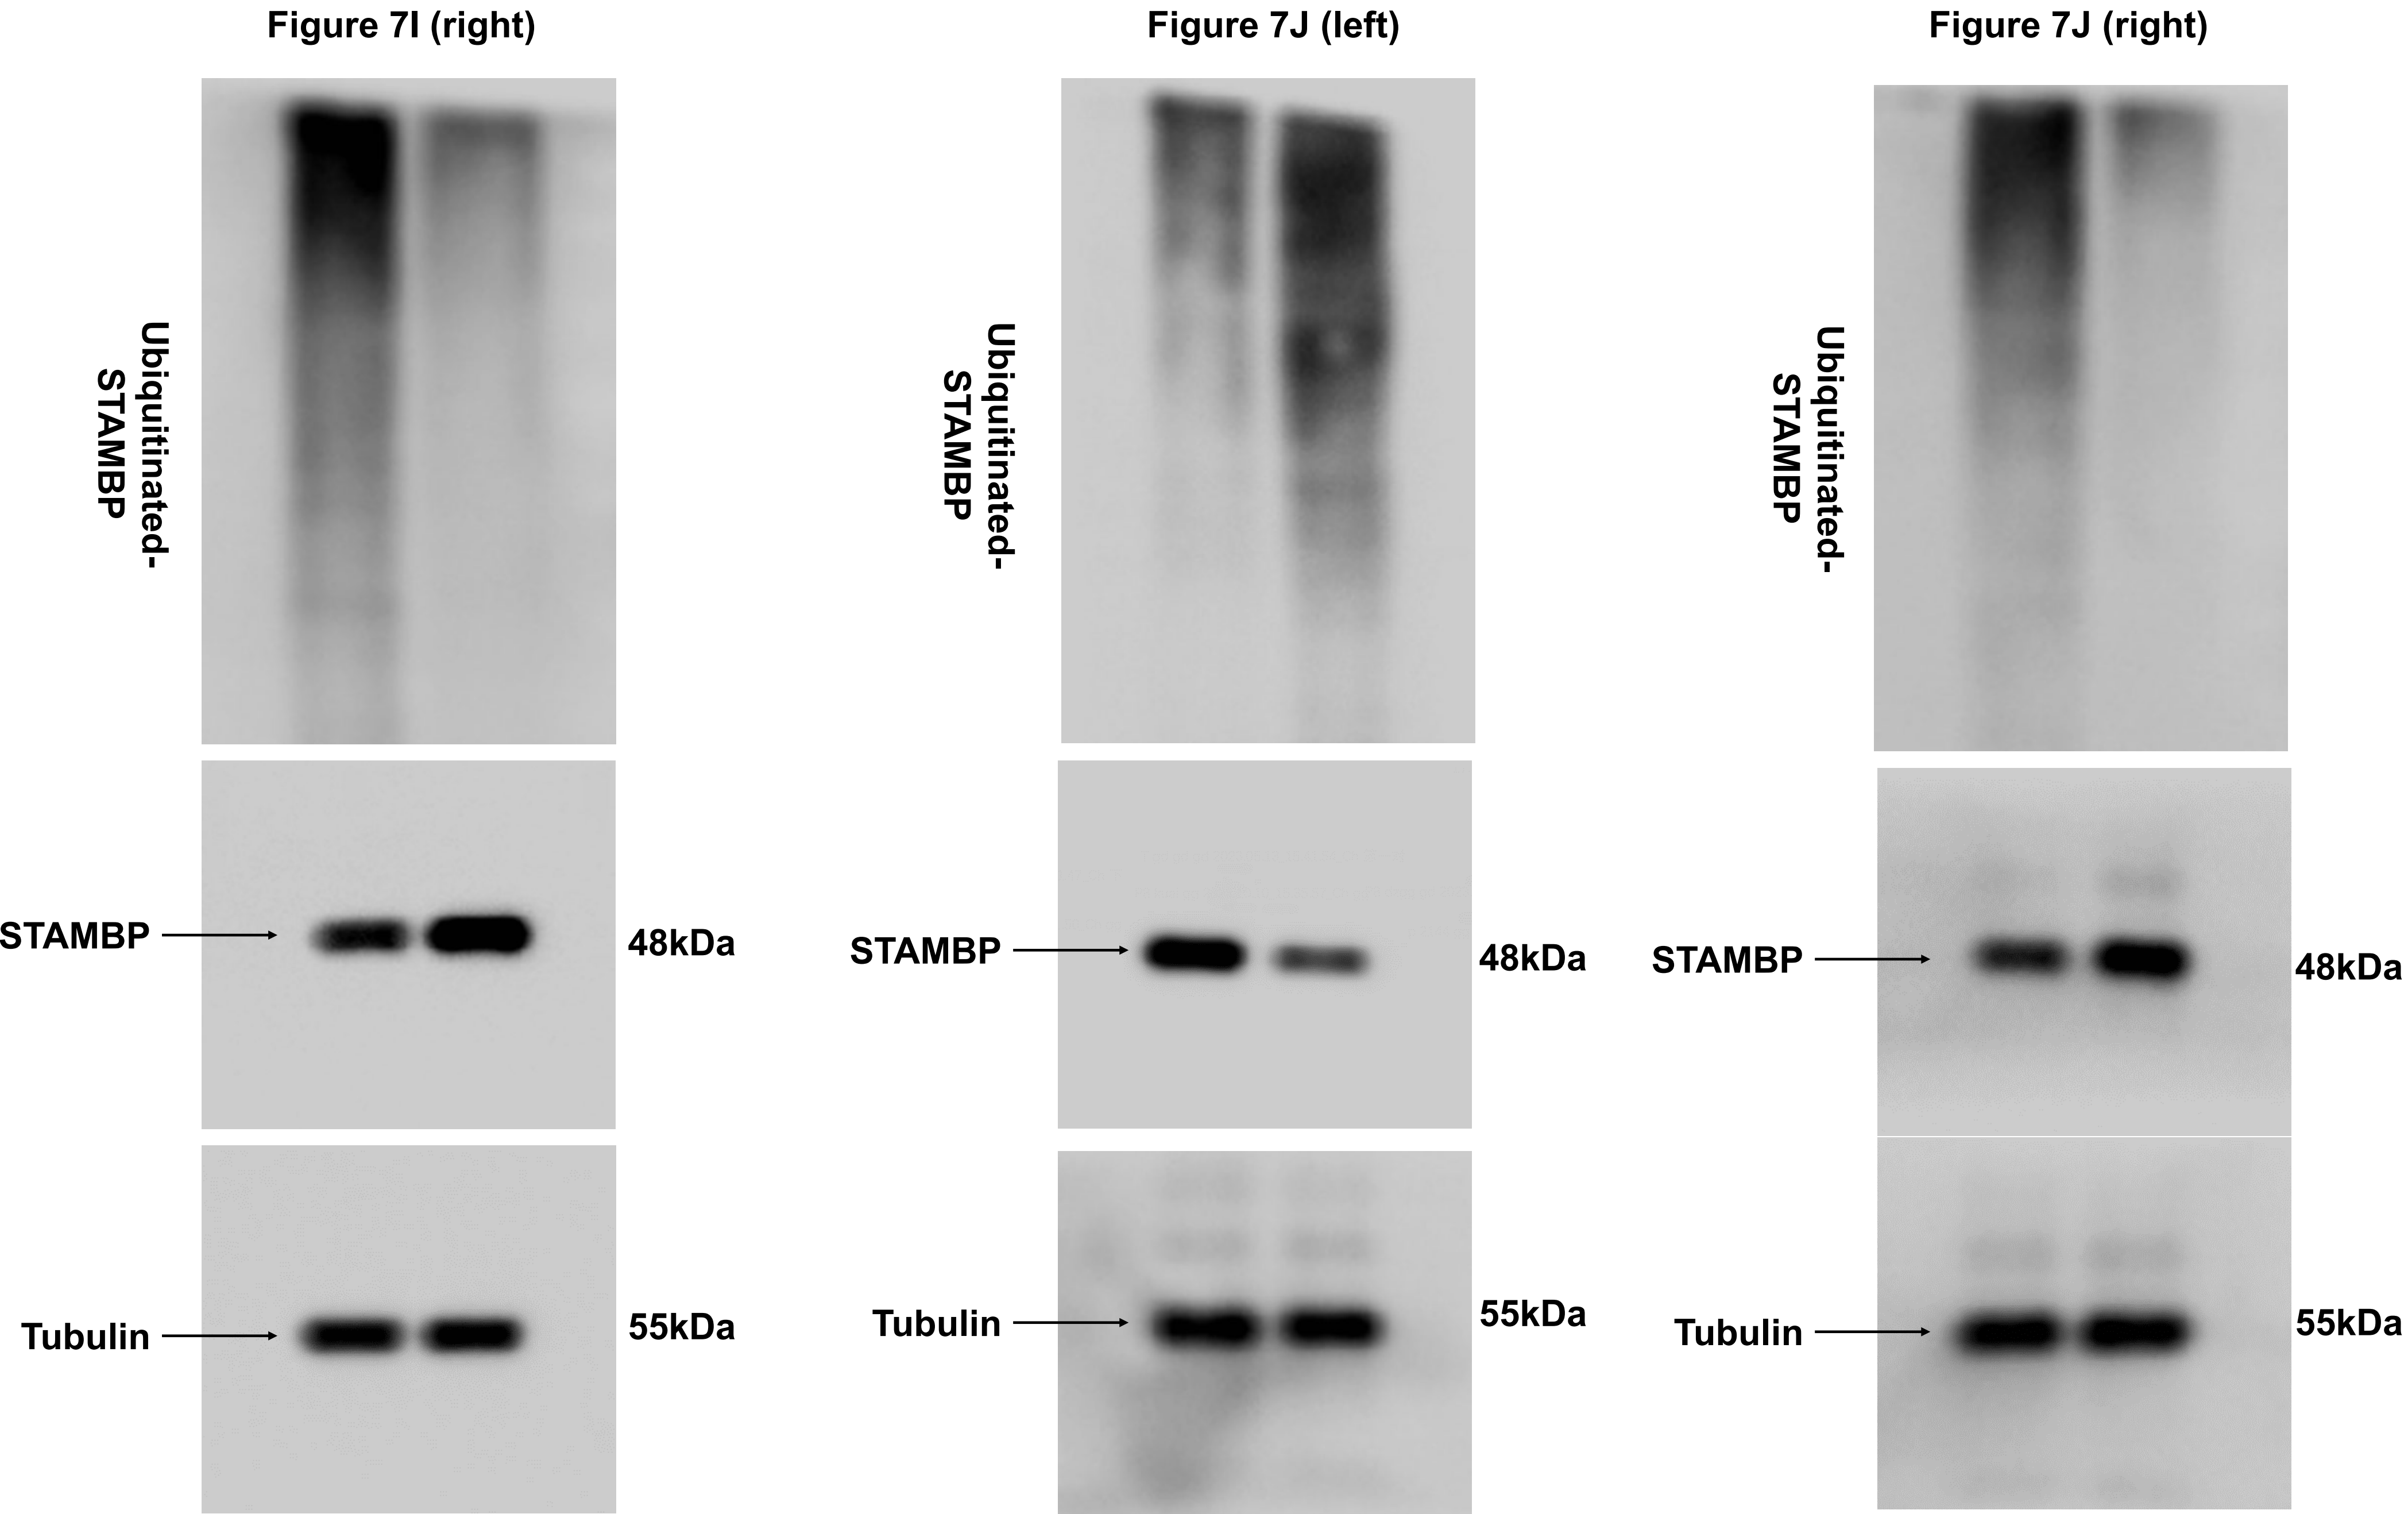



Full and uncropped western blot for Figure 8

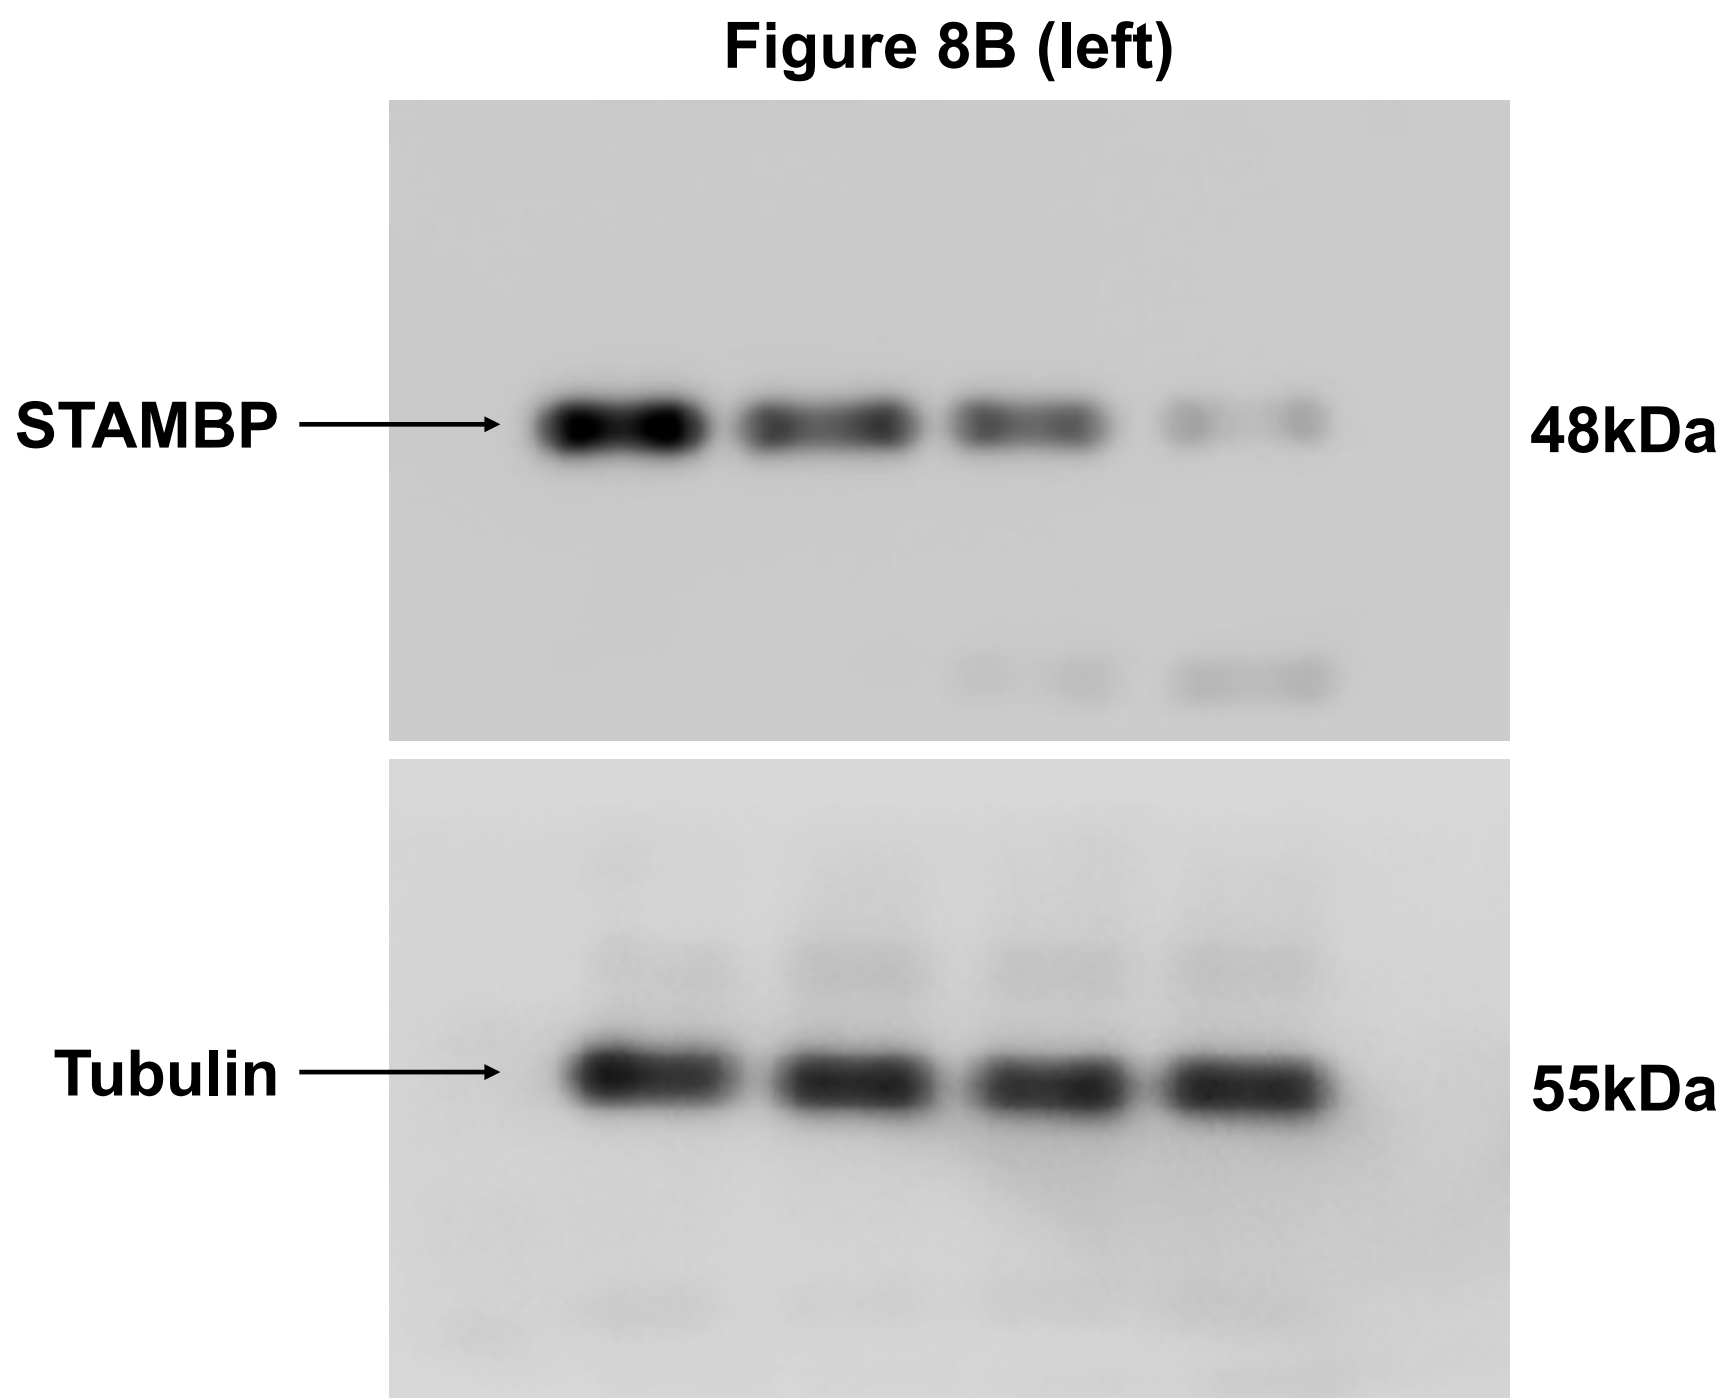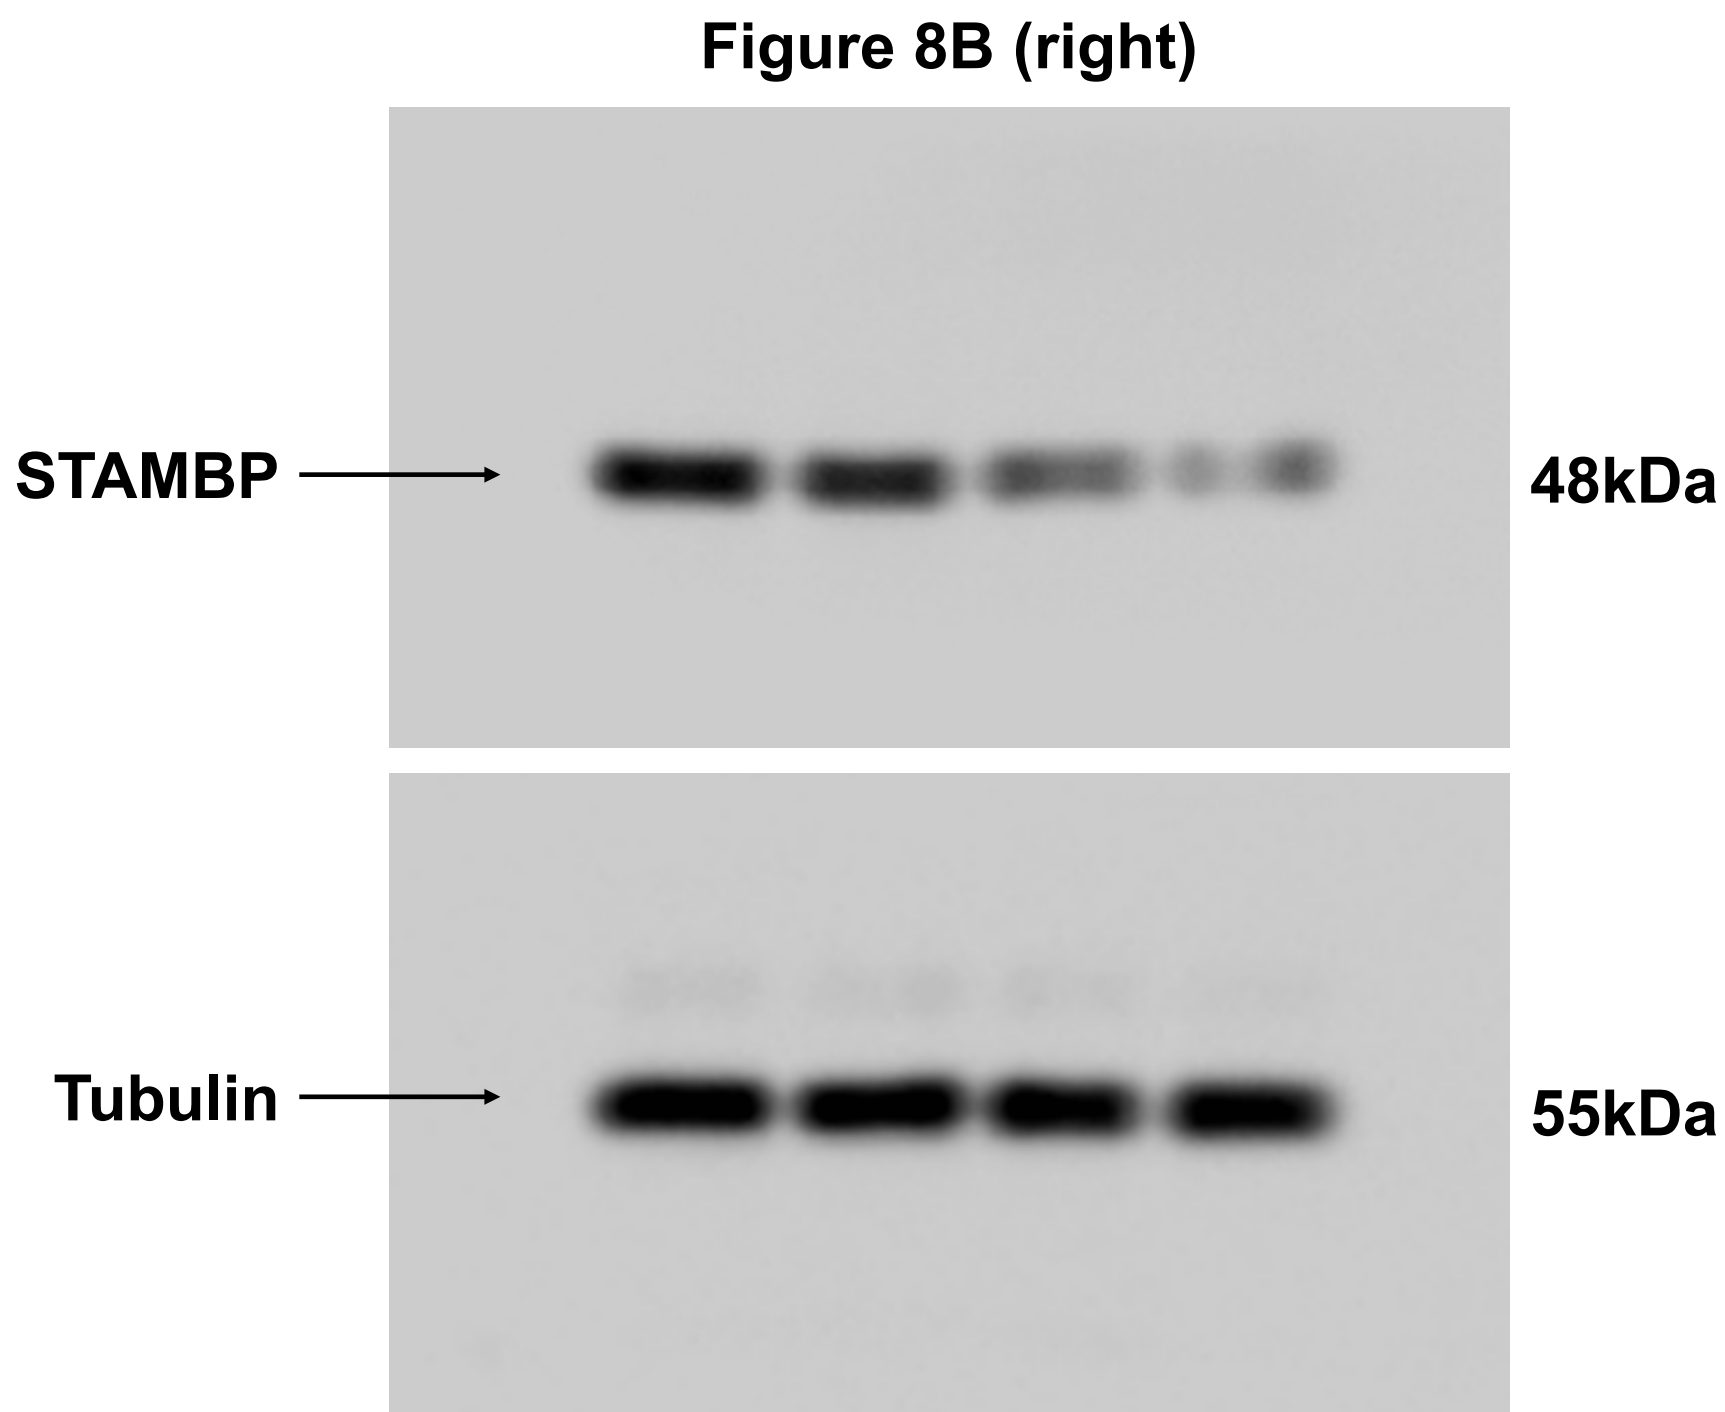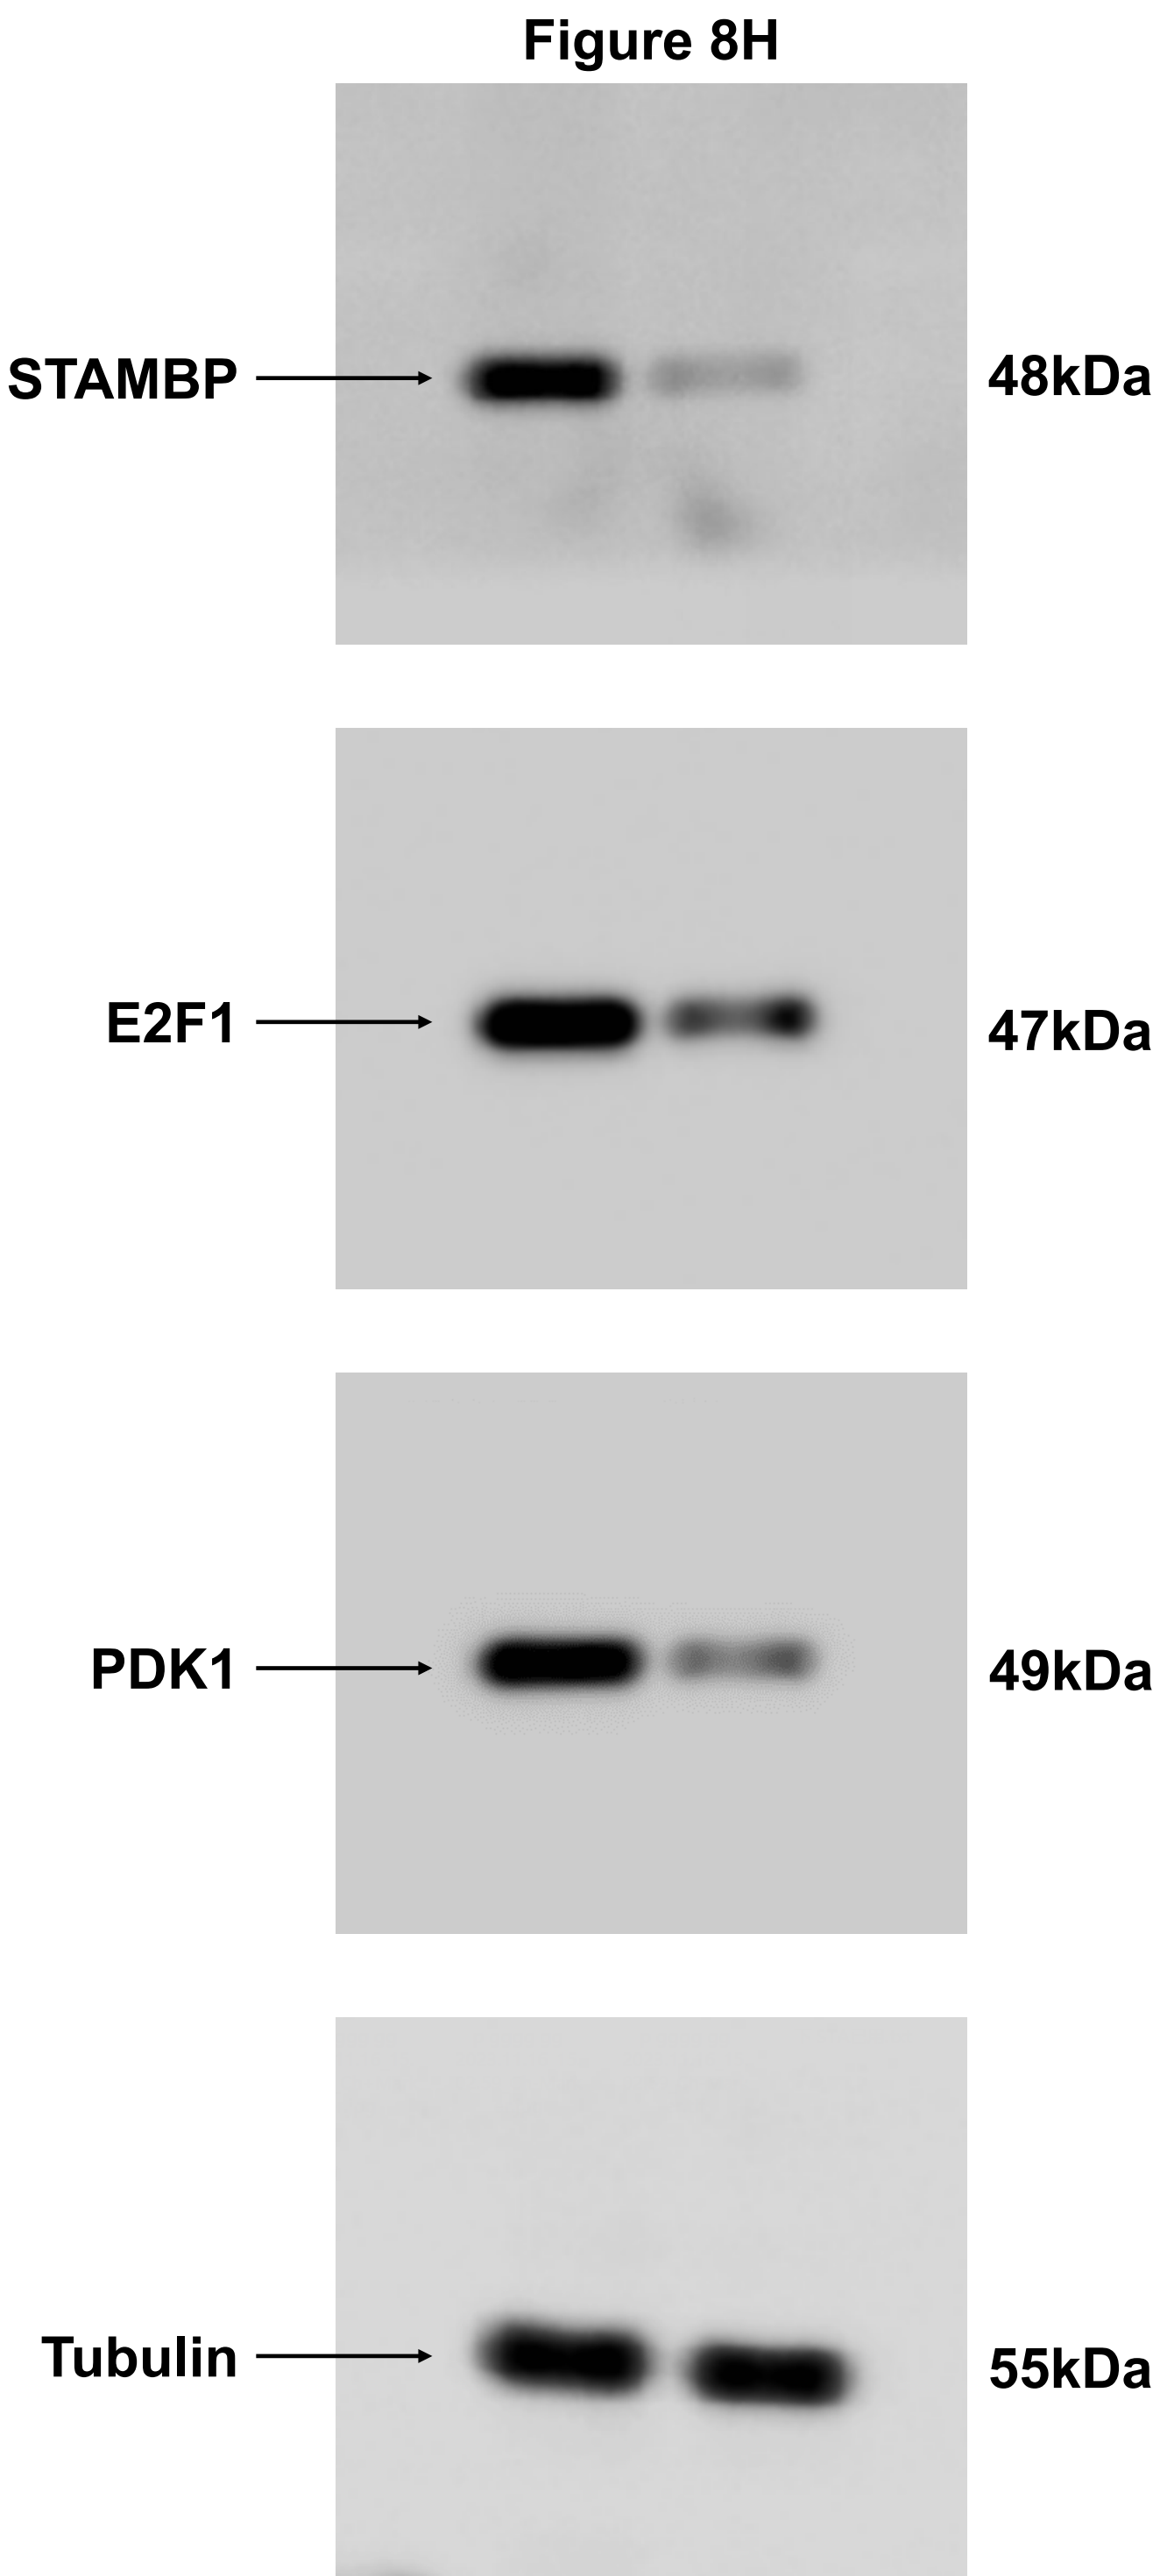



Full and uncropped western blot for Figure 9

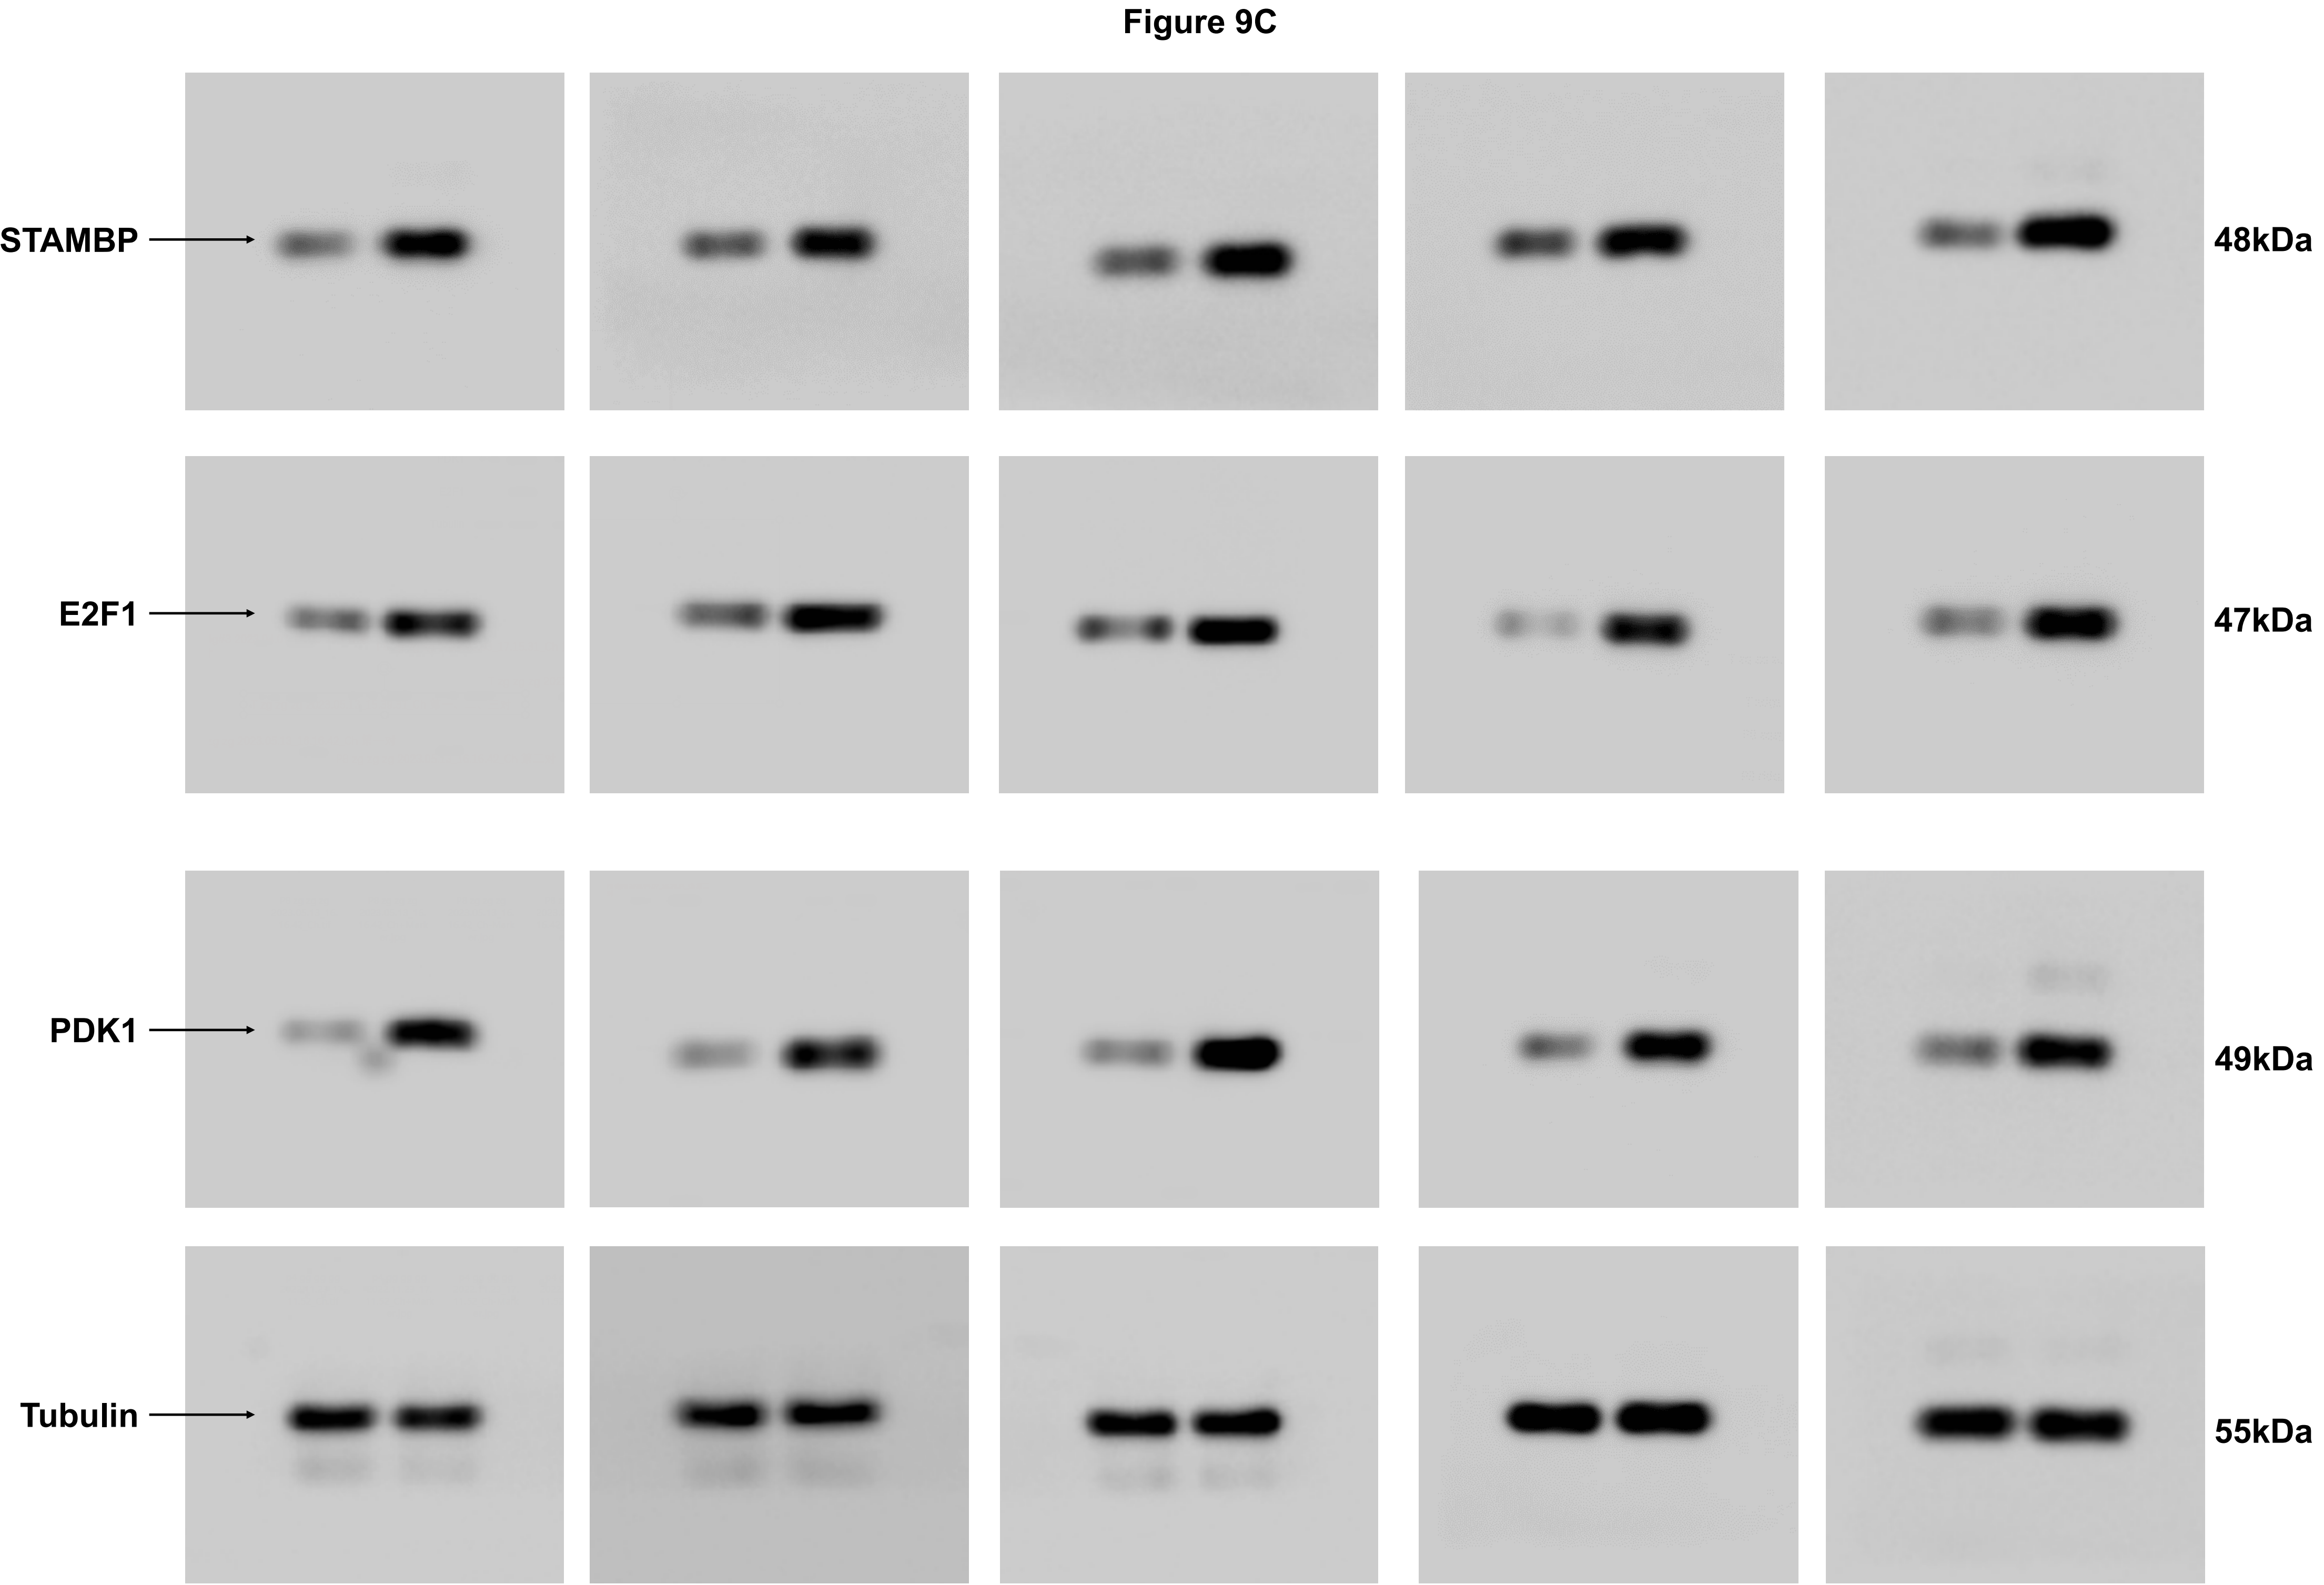



Full and uncropped western blot for Supplementary Figure 2

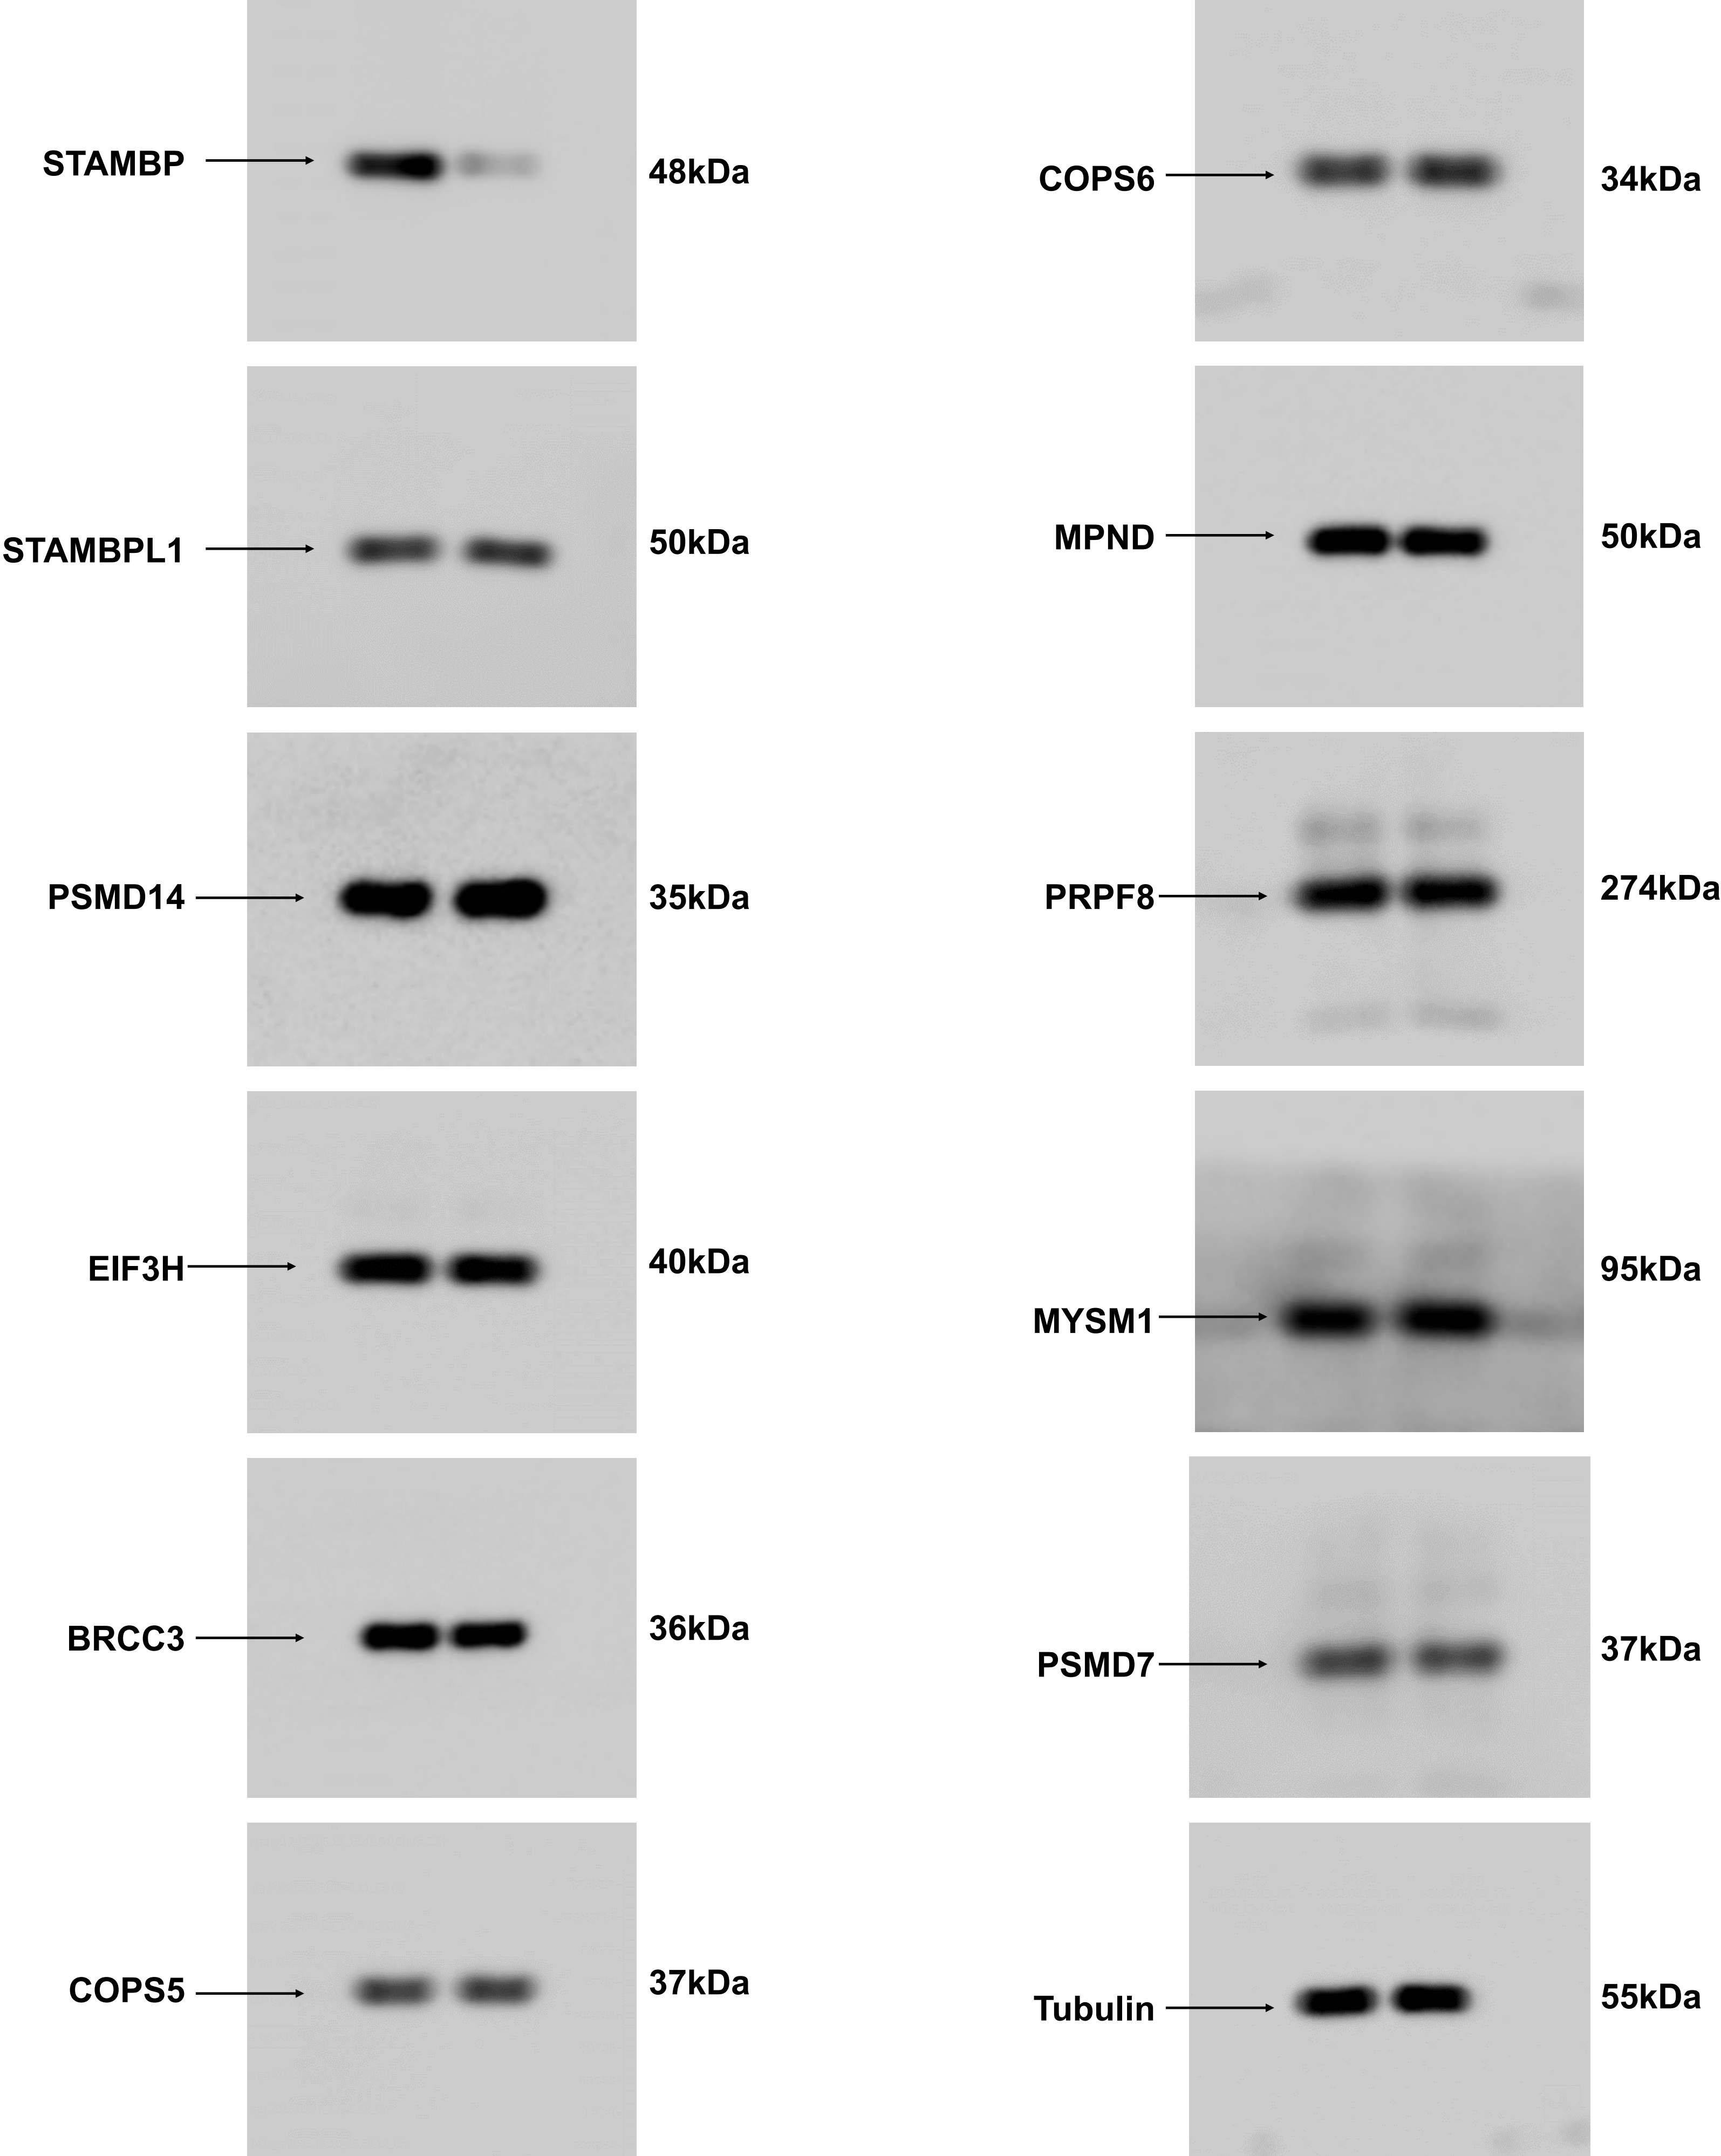



## Full and uncropped western blot for Supplementary Figure 3

Figure S3A

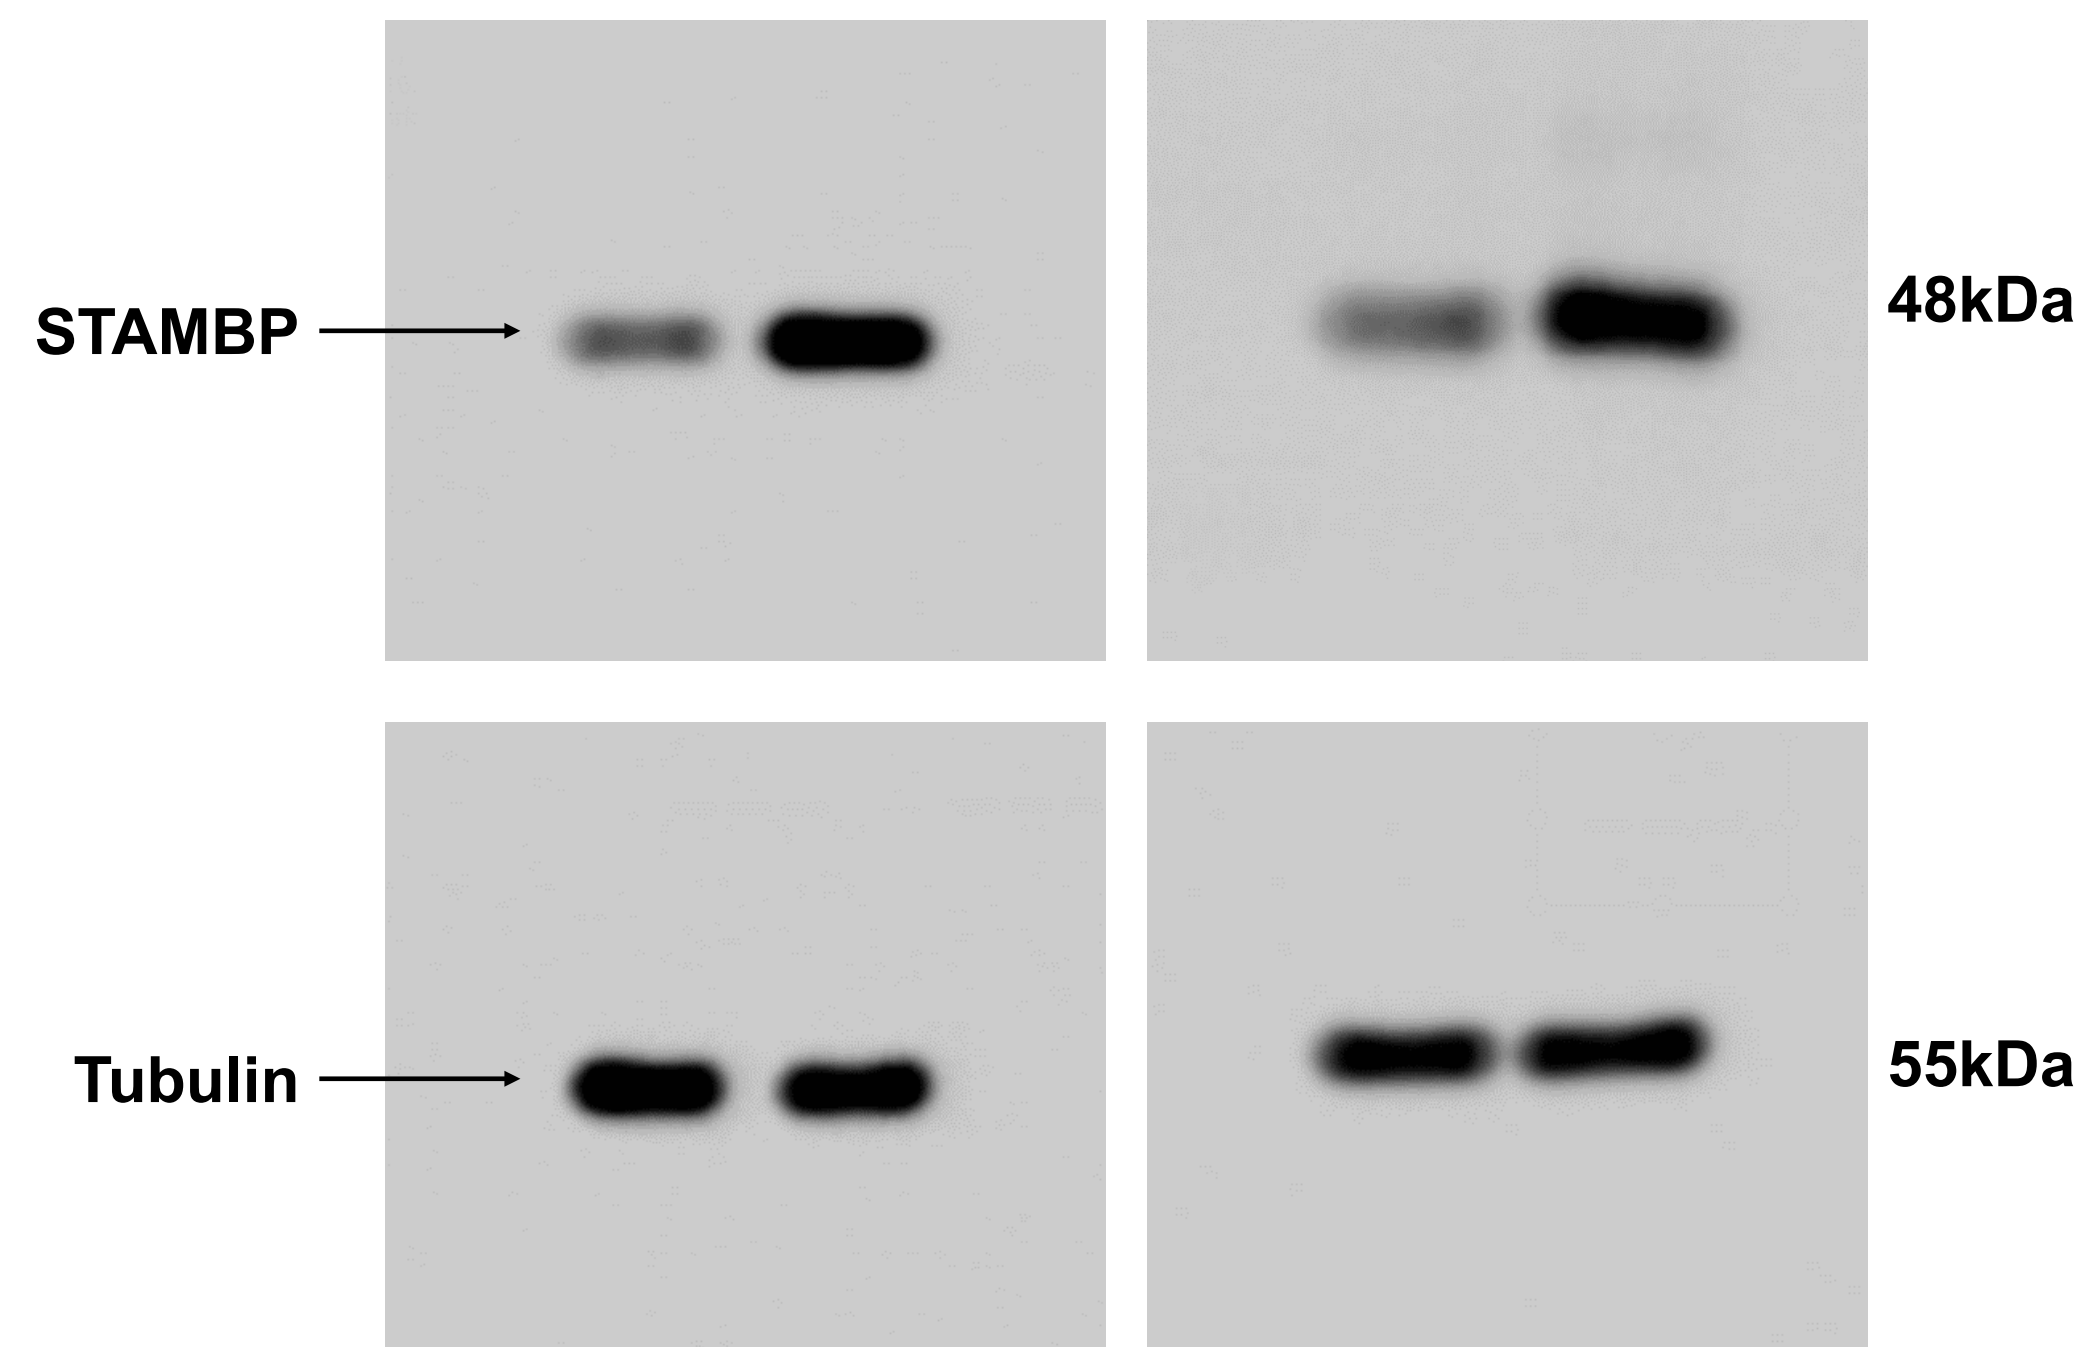

# Full and uncropped western blot for Supplementary Figure 5

Figure S5A (top)

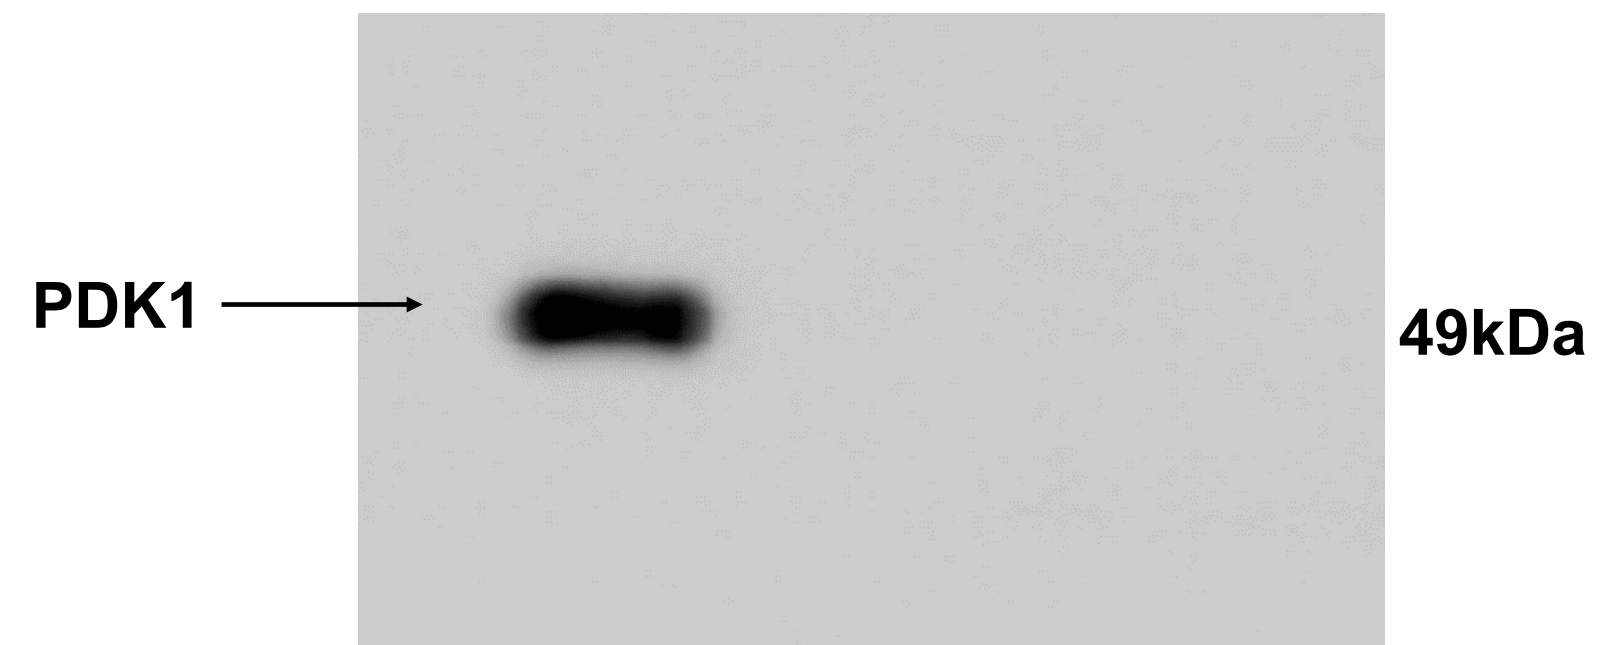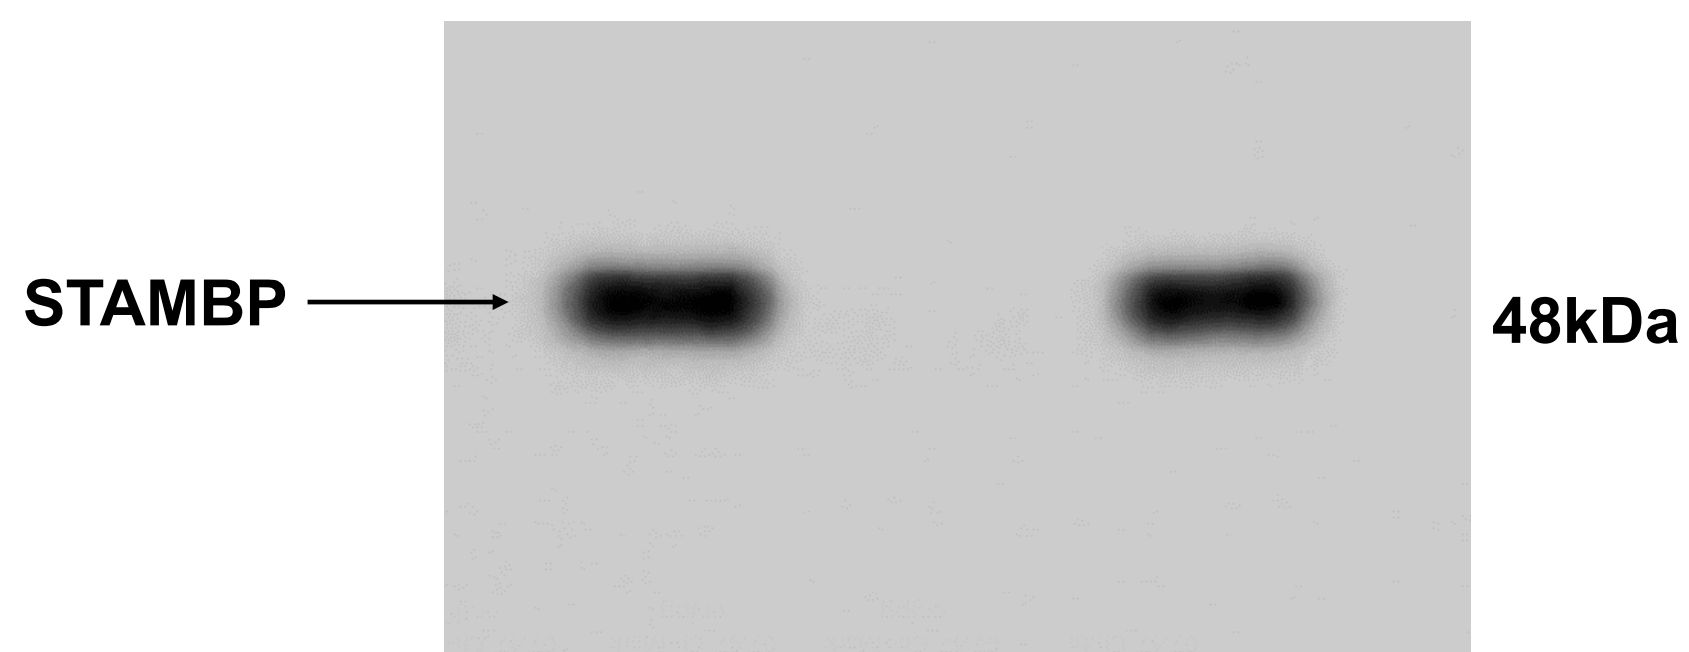

Figure S5A (bottom)

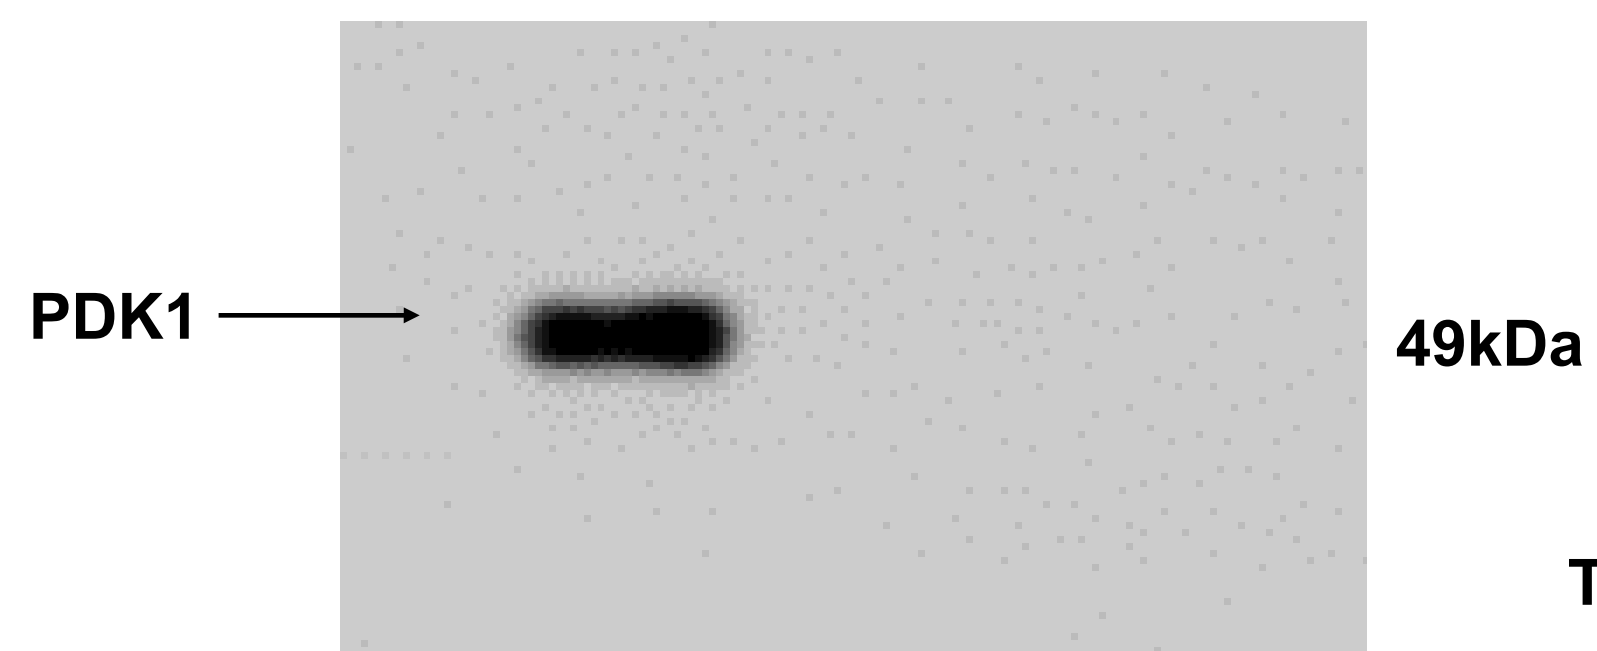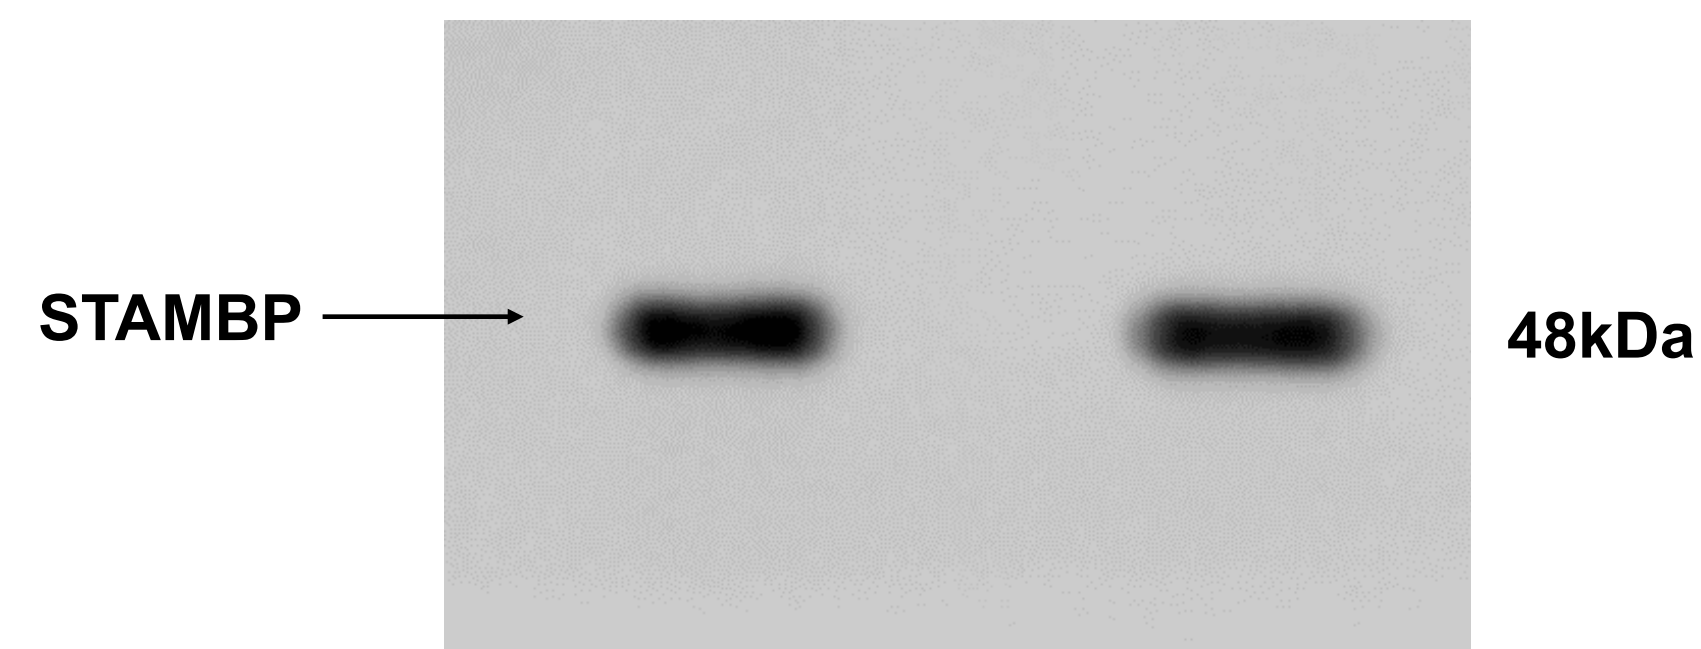

Figure S5C

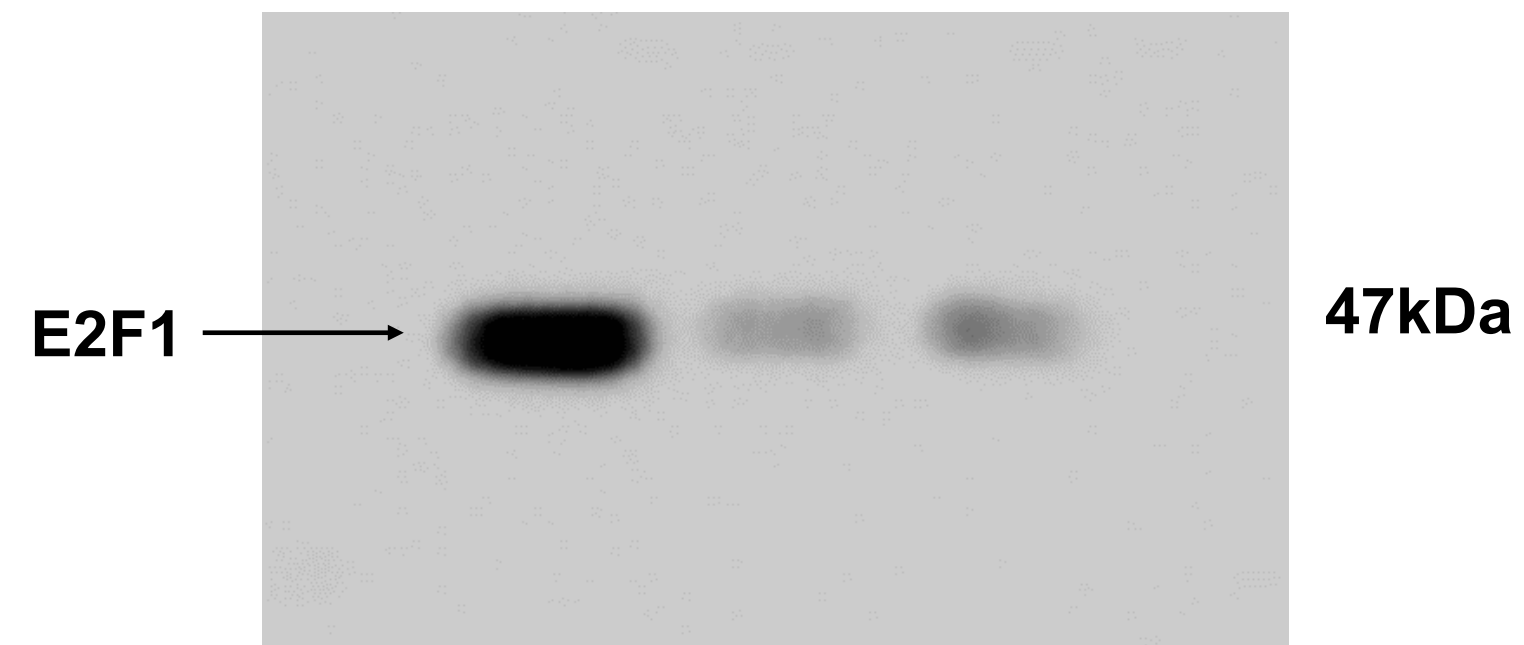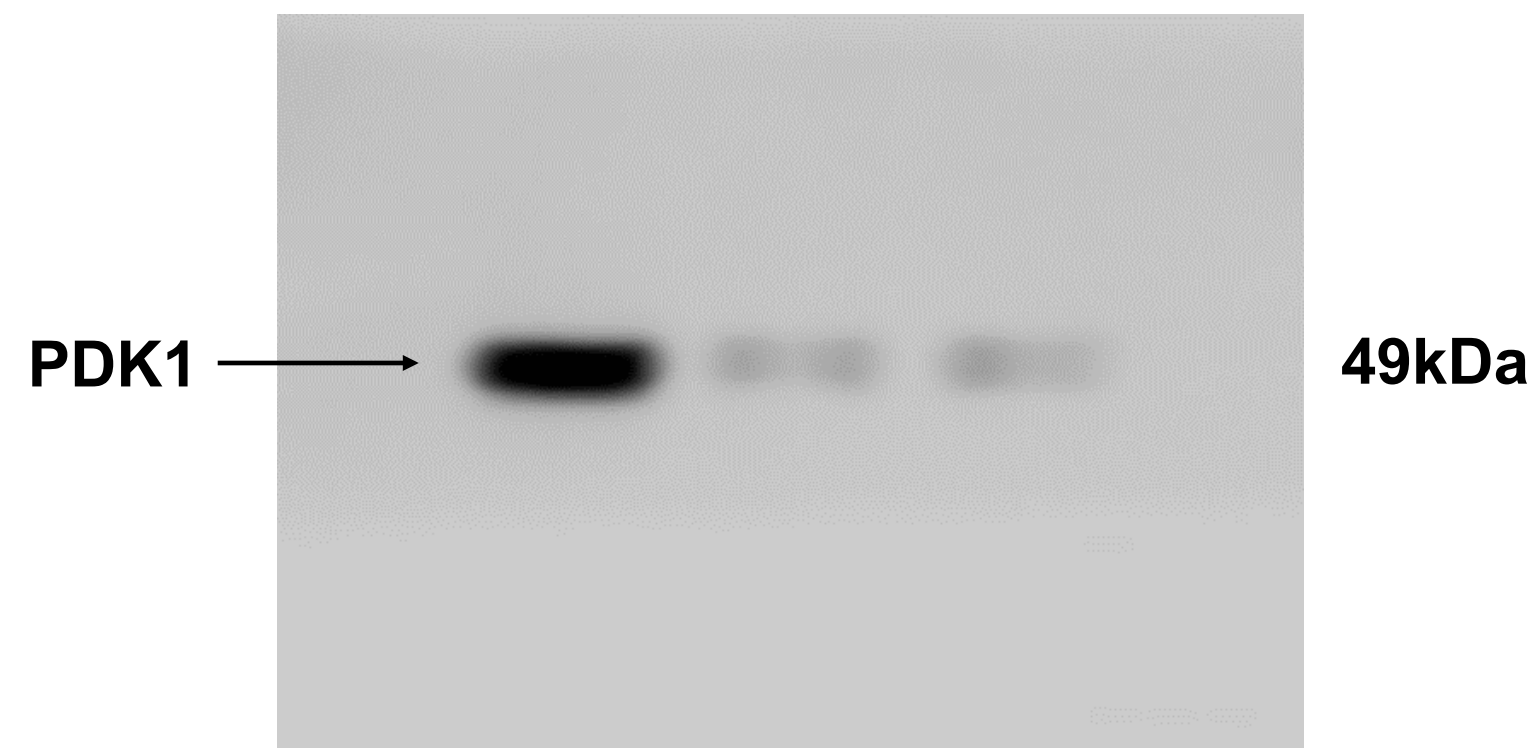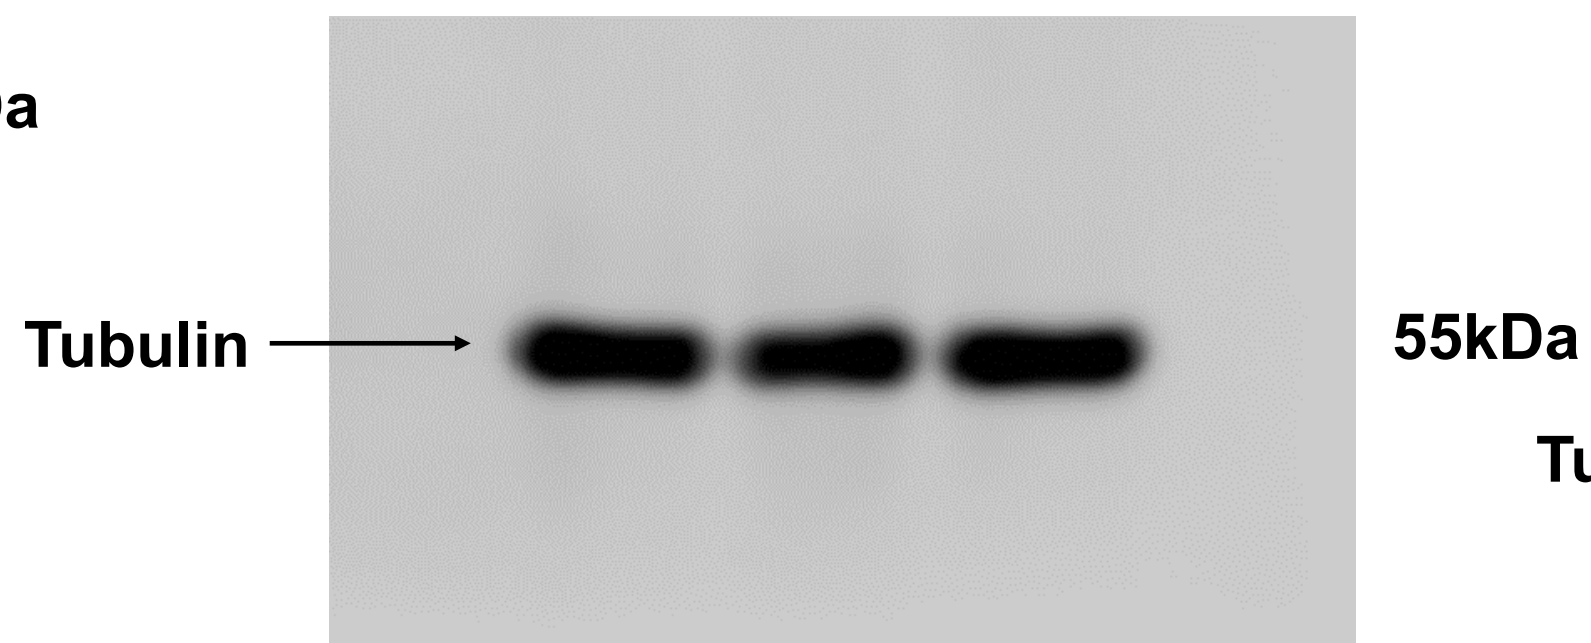

Figure S5E

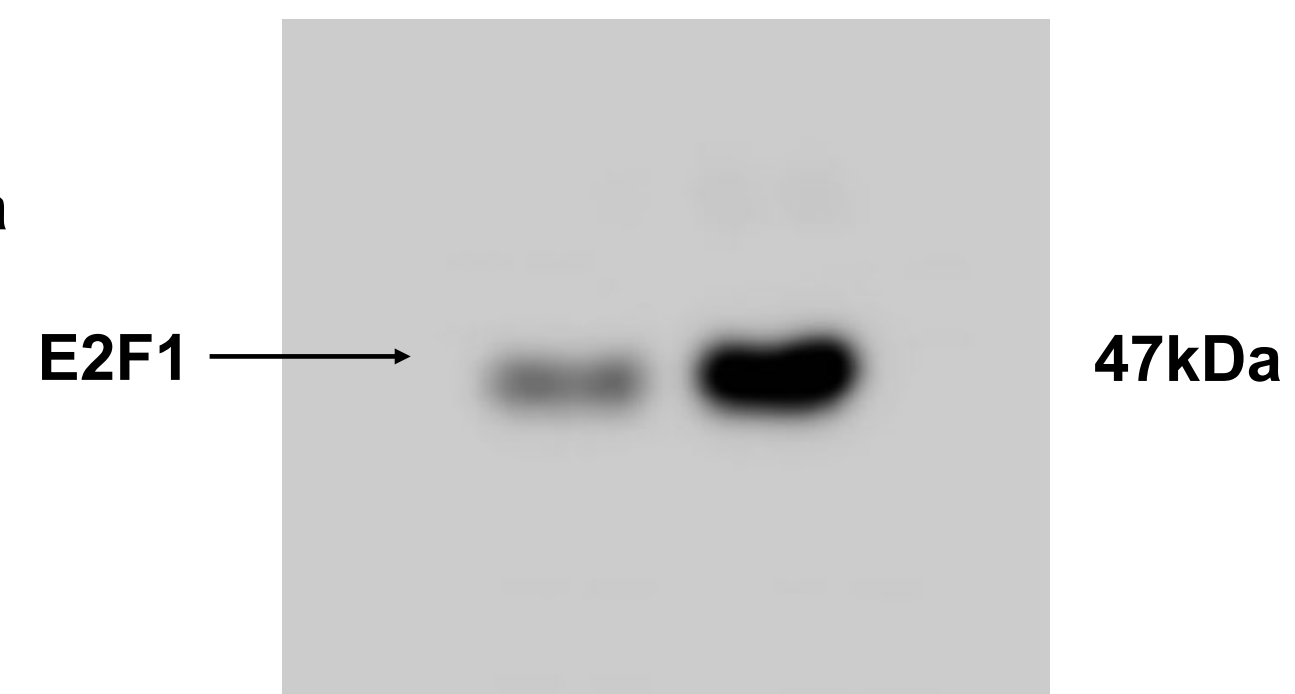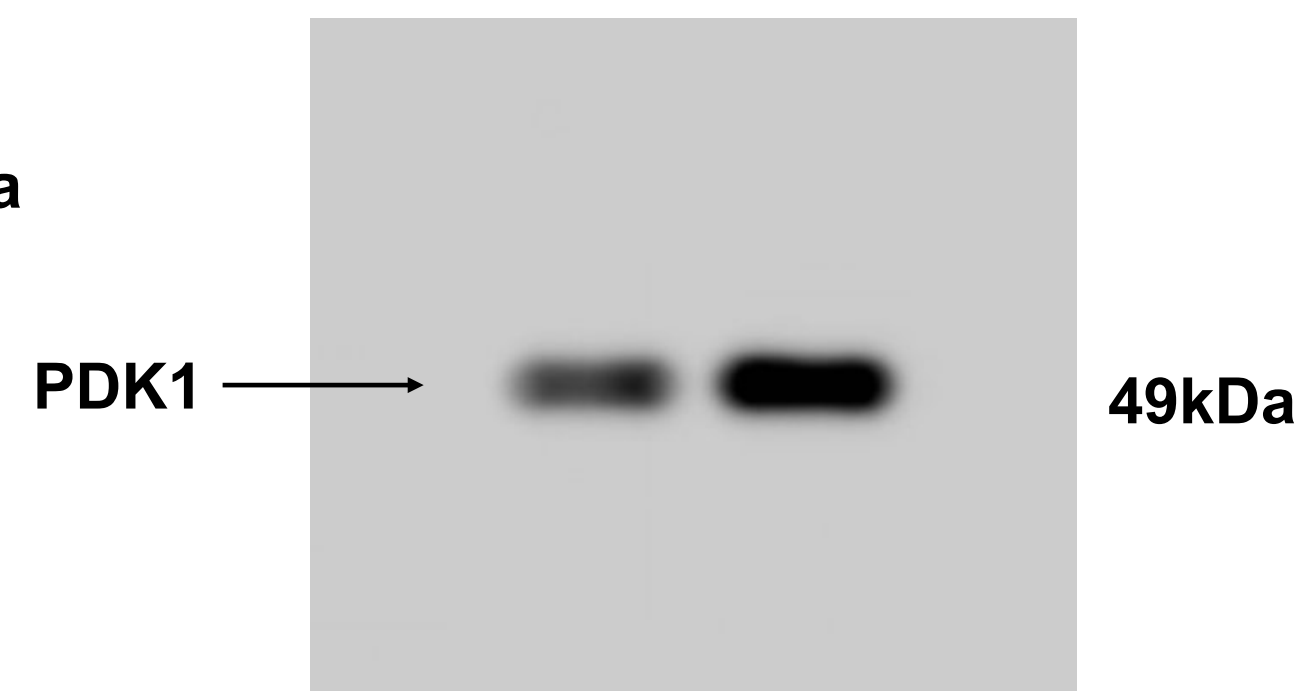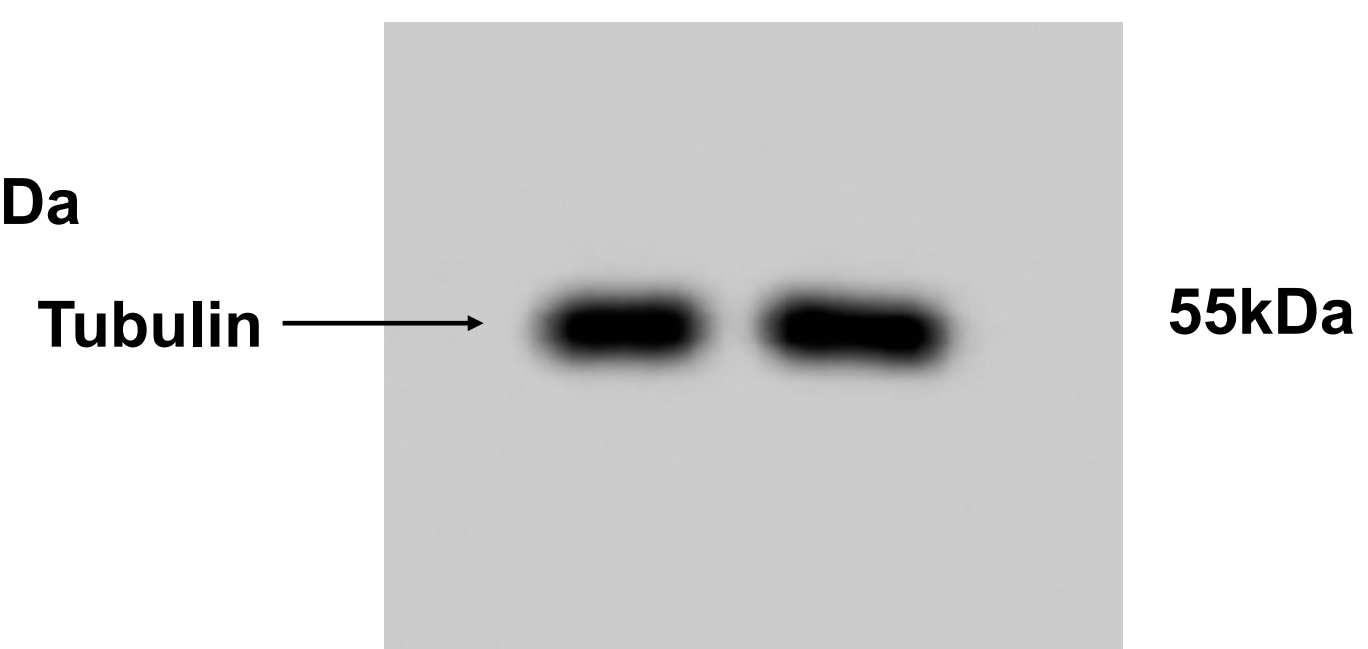



Full and uncropped western  
blot for Supplementary Figure 7

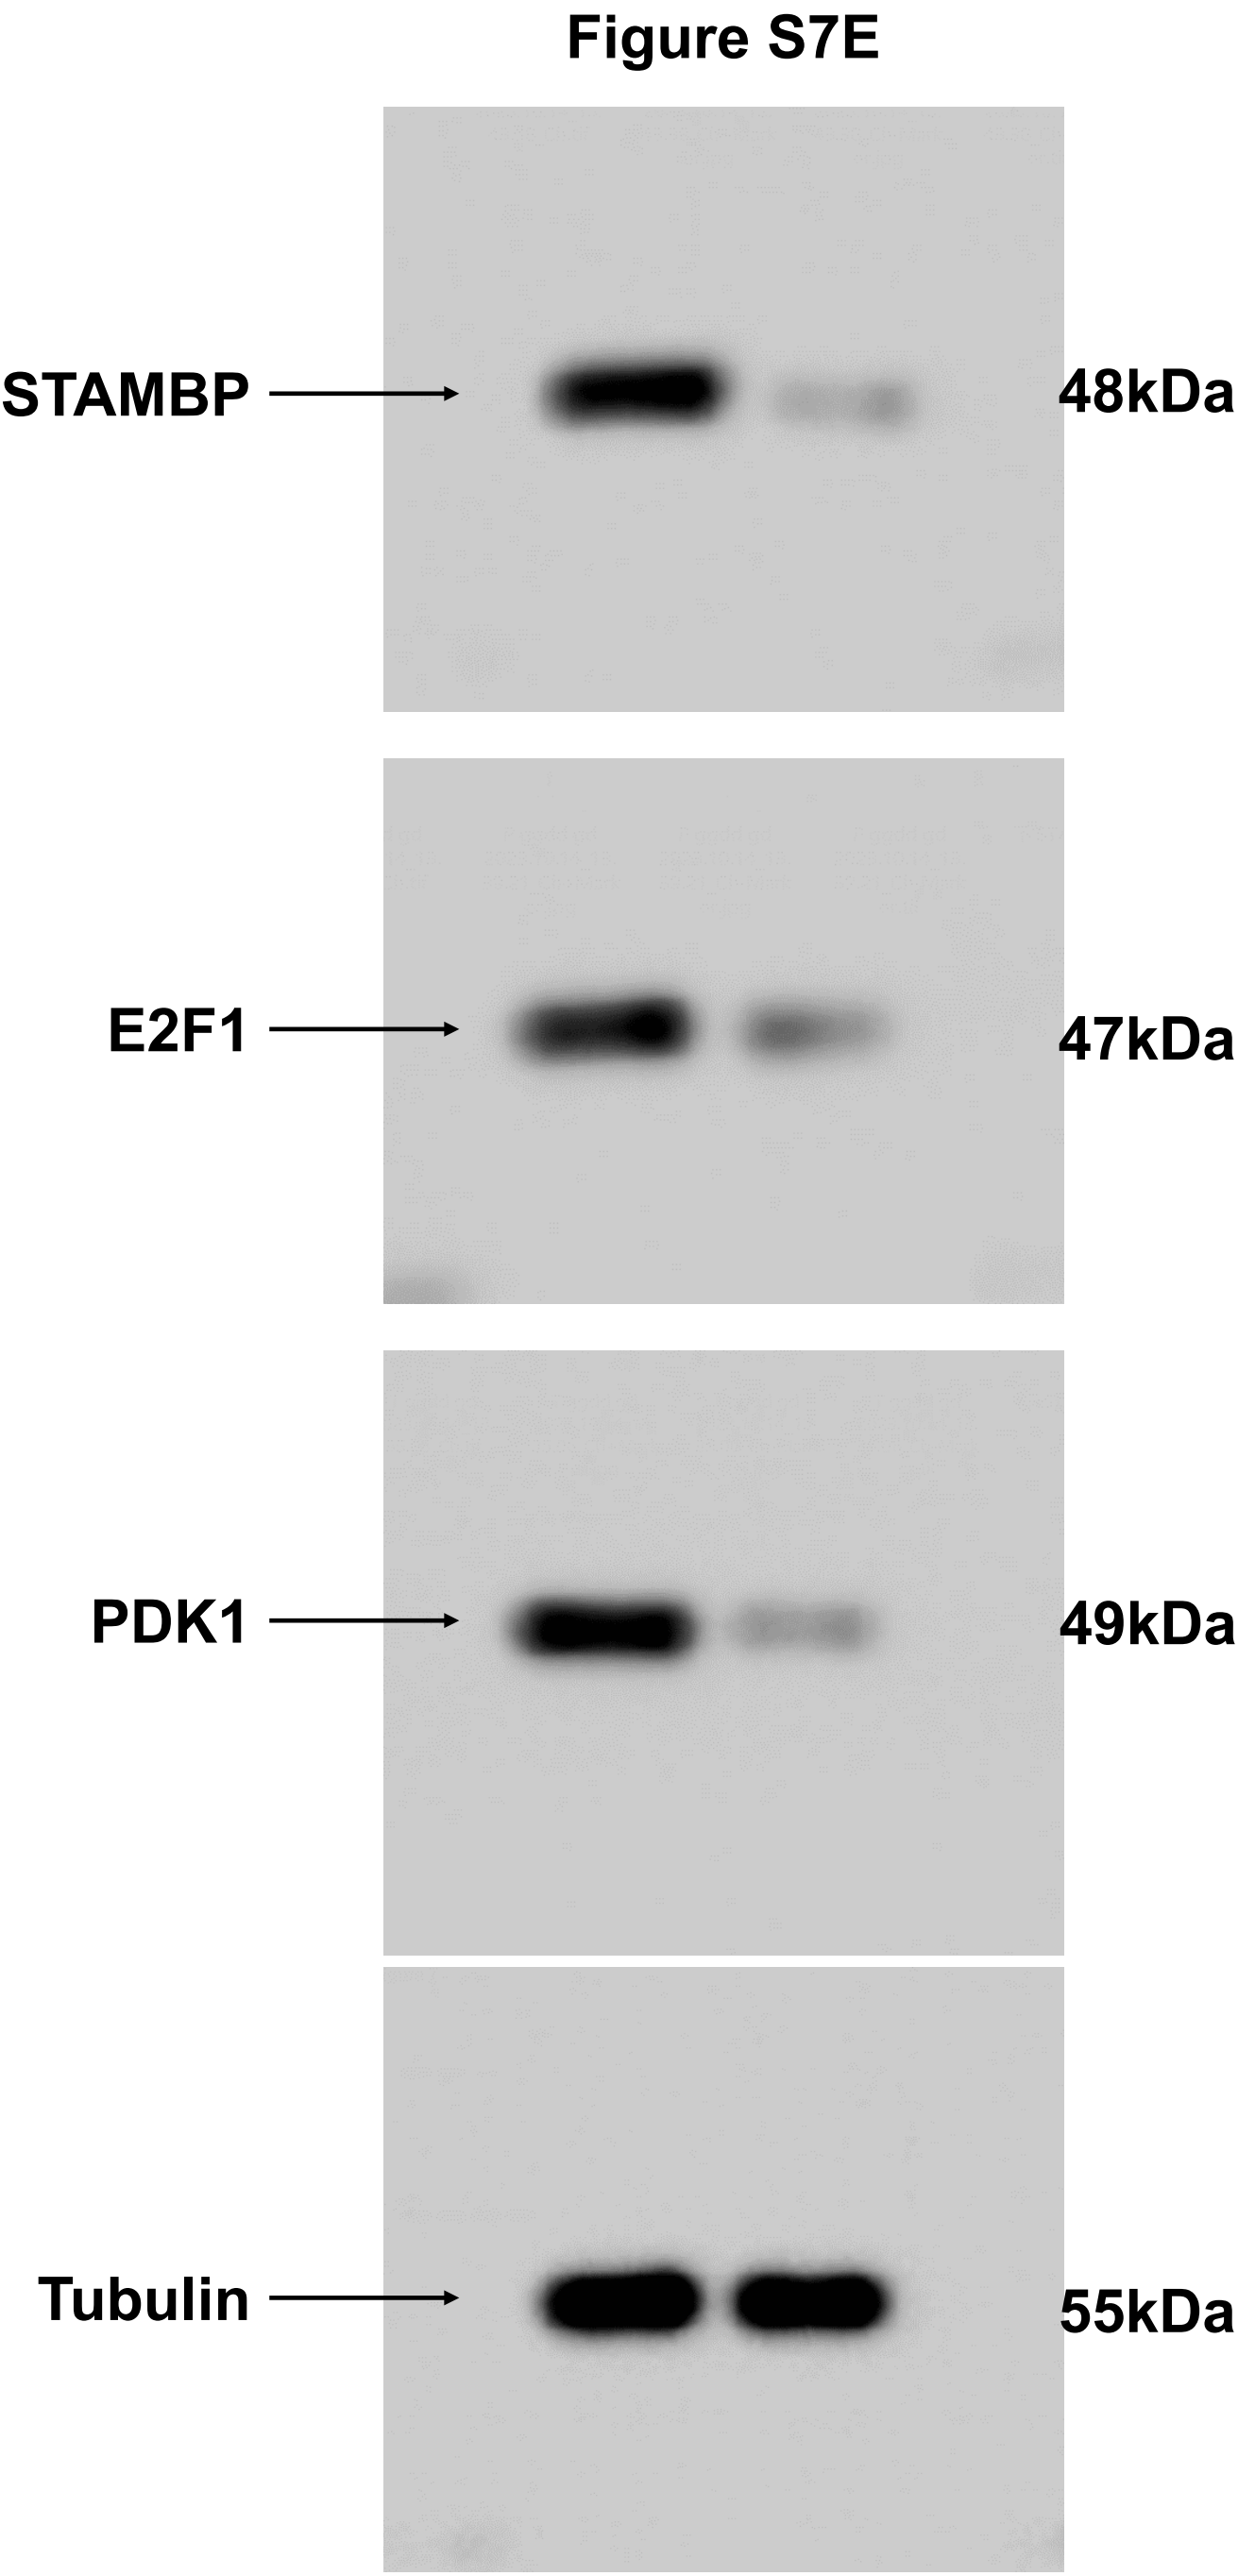

Supplement: MOESM2 [file 41419_2024_7048_MOESM2_ESM.pdf]
